# Supplementary material for: Effect of remote patient monitoring for patients with chronic kidney disease who perform dialysis at home: a systematic review
Source: PubMed Central journal article supplement — BMJ Open. 2022 Dec 7;12(12):e061772. doi: 10.1136/bmjopen-2022-061772 (PMC9730362; doi:10.1136/bmjopen-2022-061772), 2022-12-07
Supplement: bmjopen-2022-061772.draft_revisions.pdf [file bmjopen-2022-061772.draft_revisions.pdf]

# BMJ Open

BMJ Open is committed to open peer review. As part of this commitment we make the peer review history of every article we publish publicly available.

When an article is published we post the peer reviewers' comments and the authors' responses online. We also post the versions of the paper that were used during peer review. These are the versions that the peer review comments apply to.

The versions of the paper that follow are the versions that were submitted during the peer review process. They are not the versions of record or the final published versions. They should not be cited or distributed as the published version of this manuscript.

BMJ Open is an open access journal and the full, final, typeset and author-corrected version of record of the manuscript is available on our site with no access controls, subscription charges or pay-per-view fees (<http://bmjopen.bmj.com>).

If you have any questions on BMJ Open's open peer review process please email [info.bmjopen@bmj.com](mailto:info.bmjopen@bmj.com)

# BMJ Open

## Effect of remote patient monitoring for patients with chronic kidney disease who perform dialysis at home: a systematic review

|                               |                                                                                                                                                                                                                                                                                               |
|-------------------------------|-----------------------------------------------------------------------------------------------------------------------------------------------------------------------------------------------------------------------------------------------------------------------------------------------|
| Journal:                      | <i>BMJ Open</i>                                                                                                                                                                                                                                                                               |
| Manuscript ID                 | bmjopen-2022-061772                                                                                                                                                                                                                                                                           |
| Article Type:                 | Original research                                                                                                                                                                                                                                                                             |
| Date Submitted by the Author: | 07-Feb-2022                                                                                                                                                                                                                                                                                   |
| Complete List of Authors:     | Nygård, Henriette; Norwegian Institute of Public Health, Health; University of Tromso Department of Community Medicine<br>Nguyen, Lien; Norwegian Institute of Public Health<br>Berg , Rigmor C ; Norwegian Institute of Public Health; University of Tromso Department of Community Medicine |
| Keywords:                     | Telemedicine < BIOTECHNOLOGY & BIOINFORMATICS, Dialysis < NEPHROLOGY, End stage renal failure < NEPHROLOGY, Adult nephrology < NEPHROLOGY, Chronic renal failure < NEPHROLOGY, Health informatics < BIOTECHNOLOGY & BIOINFORMATICS                                                            |
|                               |                                                                                                                                                                                                                                                                                               |

SCHOLARONE™  
Manuscripts

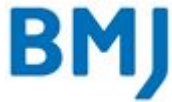

I, the Submitting Author has the right to grant and does grant on behalf of all authors of the Work (as defined in the below author licence), an exclusive licence and/or a non-exclusive licence for contributions from authors who are: i) UK Crown employees; ii) where BMJ has agreed a CC-BY licence shall apply, and/or iii) in accordance with the terms applicable for US Federal Government officers or employees acting as part of their official duties; on a worldwide, perpetual, irrevocable, royalty-free basis to BMJ Publishing Group Ltd ("BMJ") its licensees and where the relevant Journal is co-owned by BMJ to the co-owners of the Journal, to publish the Work in this journal and any other BMJ products and to exploit all rights, as set out in our [licence](#).

The Submitting Author accepts and understands that any supply made under these terms is made by BMJ to the Submitting Author unless you are acting as an employee on behalf of your employer or a postgraduate student of an affiliated institution which is paying any applicable article publishing charge ("APC") for Open Access articles. Where the Submitting Author wishes to make the Work available on an Open Access basis (and intends to pay the relevant APC), the terms of reuse of such Open Access shall be governed by a Creative Commons licence – details of these licences and which [Creative Commons](#) licence will apply to this Work are set out in our licence referred to above.

Other than as permitted in any relevant BMJ Author's Self Archiving Policies, I confirm this Work has not been accepted for publication elsewhere, is not being considered for publication elsewhere and does not duplicate material already published. I confirm all authors consent to publication of this Work and authorise the granting of this licence.

**Title**

Effect of remote patient monitoring for patients with chronic kidney disease who perform dialysis at home: a systematic review

**Corresponding author**

Henriette Tyse Nygård, Buggemyra 1, 5378 Klokkevik, Norway. [hettny@gmail.com](mailto:hettny@gmail.com)

**Authors**

Henriette Tyse Nygård, Norwegian Institute of Public Health, Oslo, Norway, University of Tromsø, Tromsø, Norway, and Haukeland University Hospital, Bergen, Norway

Lien H. Nguyen, Norwegian Institute of Public Health, Oslo, Norway

Rigmor C Berg, Norwegian Institute of Public Health, Oslo, Norway, and University of Tromsø, Tromsø, Norway

**Acknowledgements:** We are grateful to Elisabet Hafstad, Norwegian Institute of Public Health, for peer review of the systematic search strategies

**Word count:** 3759

## Abstract

**Objective:** The purpose of the systematic review was to assess the effectiveness of remote patient monitoring (RPM) follow-up compared to standard care, for patients with chronic kidney disease (CKD) who perform dialysis at home.

**Methods:** We conducted a systematic review in accordance with international guidelines. We performed systematic searches for publications from 2015-2021 in five databases (e.g. Medline, Cinahl, Embase) and a search for grey literature in reference lists. Included effect measures were quality of life, hospitalisation, technical failure as the cause for transfer to a different dialysis modality, infections, and time patients use for travel. Screening of literature, data extraction, risk of bias assessment, and certainty of evidence assessment (using the Grading of Recommendations Assessment, Development, and Evaluation approach) were done by two researchers. We conducted metaanalyses when possible.

**Results:** Seven studies met the inclusion criteria, of which two were randomised controlled trials and five were retrospective cohort studies with control groups. The studies included 9,975 participants from five countries, who were a good representation of dialysis patients in high- and upper-middle-income countries. The patients were on peritoneal dialysis (six studies) or home hemodialysis (one study). There was low to very low certainty of evidence for all of the outcomes. No studies included data for time patients used for travel.

**Conclusion:** We found low to very low evidence that indicate there may be positive effects of RPM follow-up, in comparison to standard care only, for adult patients with CKD who perform dialysis at home. Offering RPM follow-up for home dialysis patients as an alternative or supplement to standard care appears to be safe and provide health benefits, but future implementation should be coupled with robust, high quality evaluations.

**Protocol:** Pre-registered in PROSPERO (CRD42021281779).

### Strength and limitations of this study

- To our knowledge, this is the first systematic review to assess the effectiveness and safety of remote patient monitoring follow-up for adult patients with dialysis-dependent chronic kidney disease on home dialysis (hemodialysis and peritoneal dialysis).

- Our systematic review was conducted in line with guidelines from the Cochrane and Grade working group. The researchers specialise in systematic review research, one researcher is a registered nurse with long and diverse nephology experience, and the searches were conducted by a search specialist.
- Due to study heterogeneity, inconsistent measurement and reporting, our ability to conduct metaanalyses was limited.

## Introduction

Chronic kidney disease (CKD) is a significant public health concern, with 8-16% of the world's population affected.<sup>1</sup> It is characterised by a need for close monitoring, poor health outcomes, and a high economic burden for society as well as for the individual.<sup>2</sup> The world's population is growing older, and with CKD prevalence rising parallel with age,<sup>2</sup> an increasing number of people will continue to need monitoring and treatment with dialysis. There are two main types of dialysis: Peritoneal dialysis (PD) and hemodialysis (HD). Both are suitable treatment options when the kidneys are unable to filter the blood sufficiently.<sup>3</sup>

With the use of technology, there are encouraging possibilities for thorough patient follow-up, and at the same time, human resource savings.<sup>4-6</sup> Both PD and HD can be performed at home. With home dialysis, the patients receive comprehensive training arranged by staff at a dialysis centre to ensure that they have the skills and knowledge required to perform the treatment at home.<sup>3 7</sup> While dialysis is time-consuming regardless of location, patients on home dialysis are not dependent on hospital service hours and may experience more freedom than patients receiving in-centre dialysis.<sup>8 9</sup> Additionally, for patients on in-centre dialysis, the burden of time spent commuting between home and hospital can be extensive. They often also spend a substantial amount of time waiting for transport and waiting to be assisted by hospital staff for connection and disconnection from HD. Research shows that travel time to dialysis exceeding 60 minutes is associated with significantly decreased health-related quality of life (QoL) and significantly increased mortality risk compared to patients who travel 15 minutes or less.<sup>10</sup> With dialysis at home, it is reasonable to expect considerable time savings for the patients as well as improved health-related QoL.

In healthcare there is increasing interest in utilising technology-based interventions. Telemedicine and e-health are broad terms used when medical treatment, examination, or patient follow-up is done from a distance.<sup>11</sup> Homecare telehealth is another related term, and

1  
2  
3 remote patient monitoring (RPM) is a subcategory thereof. RPM uses computer systems or  
4 software application technology that transfers patient-generated data to healthcare  
5 professionals.<sup>12</sup> Given the intervention considered in this systematic review is internet  
6 dependent, we will use the term RPM. RPM can give the patient quick access to medical  
7 expertise, independent of the distance to a treatment centre, and provides healthcare teams  
8 with valuable information about the patient's condition. Thus, RPM can be a tool to empower  
9 patients in self-care and for healthcare providers to offer support from a distance.<sup>11</sup>

10 Qualitative studies from the U.K. and Norway suggest that patients on home dialysis have a  
11 positive attitude towards the use of RPM and believe that this could decrease anxiety and  
12 make it easier for more patients to choose home dialysis.<sup>13 14</sup> In a recent pilot study from Italy,  
13 patients overcame physical, cognitive, and psychological barriers to PD by RPM follow-up.<sup>15</sup>

14 Strategies to switch more patients to home dialysis may have positive impacts on the  
15 patients' daily life,<sup>14 16</sup> decrease mortality,<sup>17</sup> and offer economic savings for the patients as  
16 well as for society.<sup>16 18</sup> RPM holds much promise for enhancing follow up of CKD patients on  
17 dialysis and it is critical to determine whether and which strategies are effective at improving  
18 outcomes. RPM patient follow-up is seemingly already expanding its reach. Our Google  
19 Scholar search in December 2021 showed that there has been a 200% increase in records  
20 about e-health home dialysis from 2018 to 2021. Although interest in nephrology and e-  
21 health, including RPM, is increasing, to date, there are no systematic reviews about the  
22 effectiveness and safety of RPM follow-up including adult patients with dialysis-dependent  
23 CKD on home dialysis (HD and PD). We aimed to conduct a systematic review on the  
24 effectiveness of RPM follow-up compared to standard care, for adult patients with CKD who  
25 perform dialysis at home.

## 26 **Methods**

27 We conducted this systematic review in accordance with guidelines set forth in the Cochrane  
28 Handbook for Systematic Reviews of Interventions version 6.2.<sup>19</sup> The pre-specified protocol  
29 was registered in PROSPERO (CRD42021281779) and we report in line with the Preferred  
30 Reporting for Systematic Reviews and Metaanalyses (PRISMA) statement.<sup>20</sup>

### 31 *Search strategy and selection*

32 The reviewers (HN, RB) prepared the search strategy in collaboration with a research  
33 librarian (LN), and a second research librarian peer-reviewed the search strategy. The  
34 librarian (LN) conducted searches in August 2021 in CINAHL (EBSCO), EMBASE (OVID),  
35 Medline (OVID), Cochrane Database of Systematic Reviews, and CENTRAL. The search  
36  
37  
38  
39  
40  
41  
42  
43  
44  
45  
46  
47  
48  
49  
50  
51  
52  
53  
54  
55  
56  
57  
58  
59  
60

1  
2  
3 included both subject headings (e.g. MeSH in Medline) and text words. Available  
4 Supplemental Appendix 1. In addition, the two reviewers conducted hand searches in the  
5 reference lists of the included studies.  
6  
7

8  
9 The basis for the search was the inclusion criteria. We applied the (S)PICO model,  
10 which directs attention to the study design, population, intervention, comparison, and  
11 outcomes.<sup>21</sup> Eligible study designs were primary intervention studies with a control group.  
12 That is, randomised controlled trials (RCTs), non-randomised controlled studies, controlled  
13 before-after studies, and cohort studies with a control group. Study participants needed to be  
14 18 years or older, with dialysis dependent CKD who performed dialysis at home (HD or PD).  
15 The patients could perform dialysis independently or with assistance of family or other carers.  
16 CKD did not have to be the only disease of the study participant. This is because patients with  
17 CKD are known to have a higher burden of comorbidities than the average population.<sup>22</sup> The  
18 eligible intervention was RPM, understood as internet dependent technology used to transfer  
19 treatment data from the patient's home to a healthcare institution.<sup>12</sup> This included video  
20 consultations, applications installed on the patient's phone, computer, or a tablet as well as  
21 technology that transferred treatment data directly from the dialysis machine to healthcare  
22 providers.<sup>12</sup> RPM that was not directly treatment related was excluded. This included, but was  
23 not limited to, apps for lifestyle changes, interventions for blood pressure control, and  
24 interventions for diabetes management. The comparator was standard care, understood as  
25 patients performing dialysis in-centre or at home and having regular in-person consultations at  
26 a HD or PD centre. Included effect measures were QoL (measured with any type of QoL  
27 assessment tool), hospitalisation (all-cause, disease-specific, and number of hospitalisation  
28 days), technical failure as the cause for transfer to a different dialysis modality, hospital  
29 registered infections not requiring hospitalisation, and time patients use for travel. Lastly,  
30 studies had to be published in a Scandinavian or English language, in 2015-2021 because we  
31 wanted to identify all studies relevant to the question and today's clinical situation, being  
32 cognisant that technology is rapidly improving.  
33  
34  
35  
36  
37  
38  
39  
40  
41  
42  
43  
44  
45  
46  
47  
48  
49

50  
51 We imported all records from the searches into an EndNote library and removed all  
52 duplicate entries. Two researchers (HN, RB) independently screened all titles and abstracts  
53 from the literature searches in accordance with the predetermined inclusion and exclusion  
54 criteria. All abstracts that appeared to fit the inclusion criteria or did not provide enough  
55 information, were promoted to full text screening. At each level, we evaluated the identified  
56 records independently of one another using a pre-developed inclusion form. The final  
57  
58  
59  
60



1  
2  
3 determination to include or exclude was made together and any disagreements were solved by  
4 discussion.  
5

#### 6 7 *Risk of bias assessment and data extraction* 8

9 To assess the included studies for risk of bias (RoB) we used two different instruments: The  
10 Newcastle-Ottawa scale for cohort studies,<sup>23</sup> and Cochrane Risk of Bias Tool for RCTs.<sup>19</sup>  
11 Two researchers (HN, RB) conducted independent risk of bias assessments and then agreed  
12 on a final RoB evaluation, with disagreements solved by discussion.  
13  
14  
15

16 One researcher (HN) created a standard extraction form and extracted data from all  
17 included studies. The information extracted from the studies was: title, authors, publication  
18 details, study design, aim of the study, study setting (location and time the study was  
19 conducted), characteristics of included participants (age, gender etc.), characteristics of the  
20 intervention, study setting, outcomes, and results. Whenever information was available,  
21 dichotomous and continuous data for all eligible outcomes were extracted. HN contacted  
22 several authors for additional data, but did not receive a reply. RB assessed the extracted data  
23 for completeness and accuracy and any disagreements were solved by further inspection of  
24 the publication and discussion.  
25  
26  
27  
28  
29  
30  
31

#### 32 33 *Analysis and assessment of the certainty of the evidence (GRADE)* 34

35 We extracted crude outcome data for all eligible outcomes when postscores for both  
36 intervention and control groups were available and, when such data were available, adjusted  
37 outcome data (adjusted comparison (effect) estimates and their standard errors or 95%  
38 confidence intervals, CI). We provide dichotomous outcomes as the number of events and  
39 number of people in groups as proportions, risk ratio (RR), incident RR (IRR) or odds ratio  
40 (OR) as appropriate. Continuous outcomes are shown as mean difference (MD) and standard  
41 deviations (SD), or the most appropriate presentation based on the available data in the  
42 included studies.  
43  
44  
45  
46  
47  
48

49 We evaluated the characteristics of the studies' (S)PICO and when they were  
50 considered sufficiently similar, and data were available, we conducted metaanalyses. The  
51 judgments about whether metaanalyses were appropriate were based on recommendations in  
52 the Cochrane Handbook.<sup>19</sup> We used Mantel-Haenszel random effects metaanalysis for  
53 dichotomous outcomes and we presented the relative risks and their corresponding 95% CI (it  
54 was not possible to metaanalyse any continuous outcomes). We also examined between-study  
55 heterogeneity using visual inspection of CIs, the Chi-square test, and Isquare statistic,  
56  
57  
58  
59  
60

quantifying the degree of heterogeneity as described in the Cochrane Handbook.<sup>19</sup> We used RevMan version 5.4, the latest version of the Cochrane metaanalysis software.<sup>24</sup> When the studies' (S)PICOs or results were too heterogeneous to pool statistically, or data were unavailable, we reported the results narratively, in text and tables. We planned to perform a subgroup analysis for the outcome technical failure, but this was not possible due to lack of data.

We assessed the certainty of the evidence using the Grading of Recommendations Assessment, Development and Evaluation (GRADE) framework.<sup>25</sup>

### *Patient and public involvement*

Due to the nature of the study (systematic review), no patients were involved.

## **Results**

The searches returned 451 references after removal of duplicates (Figure 1). We read 24 reports in full text, including one study identified from the hand search in reference lists. The most common primary reasons for exclusion were that there was no control group or it was the wrong participants or outcomes. Seven studies published between 2018-2021 were eligible for inclusion.<sup>26-32</sup>

### *Description of the studies*

The seven included studies consisted of two RCTs and five retrospective cohort studies (Table 1). They were conducted in five different countries. There were two studies each from Columbia and USA, and one study each from China, Italy, and South Korea. Three were set in a single PD centre, four took place in two or more renal care centres and the two largest studies took place in the USA with one including 55 home HD centres and another 931 Fresenius PD clinics.

**Table 1: Description of the included studies (n=7)**

| <b>Author, (country, setting) Study design</b> | <b>Population</b>                        | <b>Intervention and comparator (follow-up time)</b>             | <b>Outcomes</b>                                     | <b>Risk of bias</b> |
|------------------------------------------------|------------------------------------------|-----------------------------------------------------------------|-----------------------------------------------------|---------------------|
| Cao 2018 (China: 1 PD centre) RCT              | N=160, on CAPD<br>Men 58%<br>Mean age 52 | RPM vs SC<br>Instant messaging application<br>(mean 11.4 mo FU) | Hospitalisations<br>Infections<br>Technical failure | Moderate            |
| Chaudhuri 2020 (USA: 931 renal centres) Cohort | N=6343, on PD<br>Men 73%<br>Mean age 57  | RPM vs SC<br>"Patient hub" application<br>(12 mo FU)            | Hospitalisations<br>Technical failure               | Low                 |
| Corzo 2020                                     | N=558, on APD<br>Men 60%                 | RPM vs SC<br>Cloud-based software                               | Technical failure                                   | Low                 |

|                                                               |                                          |                                                           |                                              |                  |
|---------------------------------------------------------------|------------------------------------------|-----------------------------------------------------------|----------------------------------------------|------------------|
| (Columbia: 5 renal centres) Cohort                            | Mean age 54                              | (mean 8.3 mo FU)                                          |                                              |                  |
| Jung 2021 (South Korea: 6 renal centres) RCT                  | N=57, on APD<br>Men 60%<br>Mean age 47   | RPM vs SC<br>Cloud-based software<br>(6 mo FU)            | QoL                                          | Moderate         |
| Milan 2020 (Italy: 1 PD centre) Cohort                        | N=73, on APD<br>Men 75%<br>Median age 60 | RPM vs SC<br>Cloud-based software<br>(6 mo FU)            | Hospitalisations<br>Technical failure<br>QoL | Low/<br>Moderate |
| Sanabria 2019 (Columbia: 28 Baxter renal care centres) Cohort | N=360, on APD<br>Men 66%<br>Mean age 57  | RPM vs SC<br>Cloud-based software<br>(Mean 9 mo FU)       | Hospitalisations<br>Technical failure        | Low              |
| Weinhandl 2018 (USA: 55 HHD centres) Cohort                   | N=2424, on HHD<br>Men 63%<br>Mean age 53 | RPM vs SC<br>Nx2me telehealth platform<br>(Mean 11 mo FU) | Technical failure                            | Low              |

Legend: APD=Automated peritoneal dialysis; CAPD=Continuous peritoneal dialysis; FU=Follow-up; HHD=Home hemodialysis; mo=Months; PD=Peritoneal dialysis; QoL=Quality of life; RCT=Randomised controlled trial; RPM=Remote patient monitoring; SC=Standard care

With respect to the population, all in all, there were 9,975 dialysis-dependent CKD patients in the studies (range 57-6343 patients). In all the studies most patients were male (range 53%-75%) and the mean age of the study participants was about 55. In all studies except one, the patients were on PD, they lived at home, and performed dialysis independently or with the assistance of a carer.

As per our inclusion criteria, the intervention was remote patient monitoring with different types of software that collected treatment data and transferred it to a treatment centre (added by the patients or automatically collected). The follow-up time ranged from 6 to 12 months. Four studies, Corzo et al.,<sup>28</sup> Jung et al.,<sup>29</sup> Milan et al.<sup>30</sup> and Sanabria et al.<sup>31</sup> used the automated PD system from Baxter: Homechoice Claria™, connected to the Sharesource platform. Milan et al.<sup>30</sup> additionally used the sleep-safe harmony home bridge system from Fresenius for half of the patients. Weinhandl & Collins<sup>32</sup> used the Nx2me telehealth platform for home HD patients. The software collects treatment data and transmits it to the healthcare providers, and the prescription can be changed ‘from afar’. Chaudhuri et al.<sup>27</sup> used the “Patient hub” application. The PD patients can see their prescription, laboratory results, and enter treatment data, and the app transmits the patient-entered data to the healthcare providers. Cao et al.<sup>26</sup> used the “kidney cleaning group” instant messaging software. Technical support, nurse support, physician support, and support from fellow patients was available through chat and video. The patients were divided in smaller groups and one experienced PD patient with few complications was the group leader. Educational resources were also available in the platform. In addition, in all studies, all patients had or were likely to receive some level of standard care. This was generally described as in-person follow-up at the hospital. However,

the frequency of standard care ranged from weekly (n=1) to every three months (n=1). Most studies had or were likely to have an in-person review monthly (n=5).

### *Risk of bias of included studies*

The RCTs had moderate risk of bias, while the retrospective cohort studies were rated fair to good methodological quality, i.e. having low to moderate risk of bias (Table 1 and Supplemental Appendix 2).

### *Effect of RPM versus standard care*

Across the studies, there were data on four of our five pre-determined outcomes:

Hospitalisation,<sup>26 27 30 31</sup> infections,<sup>26</sup> technical failure as the cause for transfer to a different dialysis modality,<sup>26-28 30-32</sup> and QoL.<sup>29 30</sup> The results are described in the text below, Table 2, and Figure 2. The GRADE assessments in Table 3 show that there was low to very low certainty of evidence for all of the outcomes. This means that the effects are largely uncertain. No publications included data for the outcome ‘time patients used for travel’.

**Table 2. Study outcomes and effect estimates**

| Study                                                                           | Outcome                                    | Result/Effect estimate (95% CI)                                                                                                          |
|---------------------------------------------------------------------------------|--------------------------------------------|------------------------------------------------------------------------------------------------------------------------------------------|
| <b>Hospitalisations</b>                                                         |                                            |                                                                                                                                          |
| Chaudhuri 2020                                                                  | Hospitalisation days (12 mo)               | Adj. IRR 0.68 (0.55-0.83)                                                                                                                |
| Milan 2020                                                                      | Hospitalisation days (6 mo)                | Median 5 days difference P 0.55                                                                                                          |
| Sanabria 2019                                                                   | Hospitalisation days (9 mo)                | Adj. IRR 0.46 (0.23-0.92)                                                                                                                |
| Cao 2018                                                                        | Hospitalisation all-cause (11 mo)          | RR 0.57 (0.17-1.88)                                                                                                                      |
| Chaudhuri 2020                                                                  | Hospitalisation all-cause (12 mo)          | Adj. IRR 0.74 (0.66-0.83)                                                                                                                |
| Milan 2020                                                                      | Hospitalisation all-cause (11 mo)          | RR 1.33 (0.63-2.81)                                                                                                                      |
| Sanabria 2019                                                                   | Hospitalisation all-cause (9 mo)           | Adj. IRR 0.61 (0.39-0.95)                                                                                                                |
| <b>Infections</b>                                                               |                                            |                                                                                                                                          |
| Cao 2018                                                                        | Infections (11 mo)                         | More peritonitis (60 in RPM group vs 40 in control group per patient month) but less exit site infections with RPM (RR= 0.45, 0.12-1.68) |
| <b>Technical failure as cause for transfer to a different dialysis modality</b> |                                            |                                                                                                                                          |
| Cao 2018                                                                        | Technical failure (11 mo)                  | RR 1.00 (0.26-3.86)                                                                                                                      |
| Chaudhuri 2020                                                                  | Technical failure (12 mo)                  | Adj. HR 0.79 (0.63-1.00)                                                                                                                 |
| Corzo 2020                                                                      | Technical failure (8 mo)                   | IRR 0.88 (0.41-1.74)                                                                                                                     |
| Sanabria 2019                                                                   | Technical failure (subgroup) (9 mo)        | RR 0.97 (0.42-2.25)                                                                                                                      |
| Weinhandl 2018                                                                  | Technical failure (subgroup) (11 mo)       | Adj. HR 0.66 (0.50-0.86)                                                                                                                 |
| <b>Quality of life</b>                                                          |                                            |                                                                                                                                          |
| Jung 2021                                                                       | QoL -Patient satisfaction questions (6 mo) | Mean 75.5 in RPM group vs 73.7 in SC group                                                                                               |
| Milan 2020                                                                      |                                            | Median 83.3 in both groups                                                                                                               |

|                         |                                                                                      |                                                                         |
|-------------------------|--------------------------------------------------------------------------------------|-------------------------------------------------------------------------|
|                         | QoL -Patient satisfaction questions (6 mo)                                           |                                                                         |
| Jung 2021<br>Milan 2020 | QoL -Dialysis staff encouragement (6 mo)<br>QoL -Dialysis staff encouragement (6 mo) | Mean 93.1 in RPM group vs 97.1 in SC group<br>Median 100 in both groups |

Legend: Adj=Adjusted; HR=Hazard ratio; IRR=Incident rate ratio; mo=Months; QoL=Quality of life; RPM=Remote patient monitoring; RR=Relative risk; SC=Standard care

**Table 3: Summary of findings (GRADE)**

For peer review only

**Population:** Patients with CKD

**Countries:** China, Columbia, Italy, South Korea, USA

**Intervention:** RPM

**Comparison:** Standard care

| Outcome,<br>follow-up time             | Anticipated absolute effects* (95% CI)                                                                    |                       | Relative effect (95% CI) | No. of participants (Studies) | Quality of evidence (GRADE)   |
|----------------------------------------|-----------------------------------------------------------------------------------------------------------|-----------------------|--------------------------|-------------------------------|-------------------------------|
|                                        | Assumed risk with control                                                                                 | Assumed risk with RPM |                          |                               |                               |
| <b>Hospitalisations (6-12 months)</b>  |                                                                                                           |                       |                          |                               |                               |
| Days                                   | All 3 cohort studies showed that there were fewer hospitalization days in the RPM group (Table 2)         |                       |                          | 6,736 (3)                     | ⊕⊕○○<br>LOW                   |
| All-cause                              | 3 of 4 studies (1 RCT, 3 cohort) showed that there were fewer hospitalizations in the RPM group (Table 2) |                       |                          | 6,936 (4)                     | ⊕○○○<br>VERY LOW <sup>1</sup> |
| Disease-specific                       | 30/198 (15.2%)                                                                                            | 10/110 (9.1%)         | RR 0.62 (0.31 to 1.24)   | 308 (2 cohort)                | ⊕○○○<br>VERY LOW <sup>2</sup> |
| <b>Infections (11 months)</b>          |                                                                                                           |                       |                          |                               |                               |
|                                        | 1 RCT reported more peritonitis but fewer exit site infections with RPM (Table 2)                         |                       |                          | 160 (1)                       | ⊕○○○<br>VERY LOW <sup>3</sup> |
| <b>Technical failure (6-12 months)</b> |                                                                                                           |                       |                          |                               |                               |
|                                        | 521/2230 (23.4%)                                                                                          | 136/786 (17.3%)       | RR 0.78 (0.66 to 0.93)   | 2856 (3 cohort)               | ⊕○○○<br>VERY LOW <sup>4</sup> |
|                                        | 2 of 3 studies (1 RCT, 2 cohort) reported fewer failures with RPM (Table 2)                               |                       |                          | 7161 (3)                      |                               |
| <b>Quality of life (6 months)</b>      |                                                                                                           |                       |                          |                               |                               |
| Patient satisfaction                   | 1 RCT found higher QoL in the RPM group, 1 cohort found QoL was similar in the two groups (Table 2)       |                       |                          | 130 (2)                       | ⊕○○○<br>VERY LOW <sup>5</sup> |

|                                                                                                                                                                                                                                                                                                                                                                                                                         |                                                                                                     |         |                               |
|-------------------------------------------------------------------------------------------------------------------------------------------------------------------------------------------------------------------------------------------------------------------------------------------------------------------------------------------------------------------------------------------------------------------------|-----------------------------------------------------------------------------------------------------|---------|-------------------------------|
| Dialysis staff encouragement                                                                                                                                                                                                                                                                                                                                                                                            | 1 RCT found higher QoL in the RPM group, 1 cohort found QoL was similar in the two groups (Table 2) | 130 (2) | ⊕○○○<br>VERY LOW <sup>5</sup> |
| <b>Travel time</b>                                                                                                                                                                                                                                                                                                                                                                                                      | 0 studies assess this outcome                                                                       |         | No evidence                   |
| <p>1. Downgraded by 1 level because of moderate risk of bias in 1 study and inconsistency</p> <p>2. Downgraded by 1 level because of imprecision</p> <p>3. Downgraded by 3 levels because of moderate risk of bias, inconsistency, imprecision</p> <p>4. Downgraded by 1 level because of moderate risk of bias in 1 study and imprecision</p> <p>5. Downgraded by 1 level because of inconsistency and imprecision</p> |                                                                                                     |         |                               |
| <p>CI: Confidence interval; RCT: Randomised controlled study; SD: Standard deviation. *The risk in the intervention group (and its 95% confidence interval) is based on the assumed risk in the comparison group and the relative effect of the intervention (and its 95% CI).</p>                                                                                                                                      |                                                                                                     |         |                               |

### Hospitalisations

One RCTs and three observational studies from Italy, Colombia, China, and the USA examined the effect of RPM on hospitalisations.<sup>26 27 30 31</sup> However, the outcome was reported differently across the studies, as hospitalisation days/days admitted, all-cause hospitalisations, and disease-specific hospitalisations (caused by overhydration, access dysfunction, and infections).

**Hospitalisation days.** The three observational studies, Chaudhuri et al.,<sup>27</sup> Milan et al.,<sup>30</sup> and Sanabria et al.<sup>31</sup>, all found fewer hospitalisation days in the RPM group than the control group (Table 2). The results in Sanabria et al.<sup>31</sup> were from a matched sample, as data for the whole sample was not available. This study showed the largest effect with a difference of six hospitalisation days (IRR 0.46, 0.23-0.92).

**All-cause hospitalisations.** One RCT<sup>26</sup> and three observational studies<sup>27 30 31</sup> had data on general, all-cause hospitalisations. While three of the four studies showed that RPM users had less all-cause hospitalisations than patients with standard care only, the fourth study favoured standard care (Table 2).

**Disease-specific hospitalisations.** The results on disease-specific hospitalisations from two observational studies, Milan et al.,<sup>30</sup> and Sanabria et al.<sup>31</sup> could be pooled in a metaanalysis (Figure 2). The non-significant result suggested there were fewer disease-specific hospitalisations in the RPM group than in the control group (RR 0.62, 95% CI 0.31-1.24).

1  
2  
3 Milan et al.<sup>30</sup> defined disease-specific hospitalisations as infections (peritonitis and exit site),  
4 overhydration, and access dysfunction. Sanabria et al.<sup>31</sup> provided numbers for hospitalisations  
5 due to peritonitis and overhydration.  
6  
7

### 8 9 Infections not requiring hospitalisation

10 Only one RCT, from China, examined the effectiveness of RPM follow-up for PD patients on  
11 infections.<sup>26</sup> The result for this outcome was inconclusive, as Cao et al. found more peritonitis  
12 but fewer exit site infections with RPM. It was not specified whether the infections were  
13 treated at home or in the hospital.  
14  
15  
16

### 17 18 Technical failure as the cause for transfer to a different dialysis modality

19 One RCT from China<sup>26</sup> found no difference between the groups while five observational  
20 studies from the USA<sup>27 32</sup>, Colombia<sup>28 31</sup>, and Italy<sup>30</sup> consistently reported less technical  
21 failure as cause for transfer to a different dialysis modality in the RPM group compared to the  
22 control group (Table 2). Three of the cohort studies could be pooled in a metaanalysis; the  
23 result implies benefit of RPM (0.78, 95% CI 0.66, 0.92) (Figure 2). Two of the studies<sup>31 32</sup>  
24 gave data on novice patients with less than three months treatment duration at baseline,  
25 indicating a positive, but non-significant effect of RPM in new patients (Table 2).  
26  
27  
28  
29  
30  
31

### 32 33 Self-reported Quality of Life

34 Both studies, one RCT<sup>29</sup> and one observational study,<sup>30</sup> reporting on quality of life used the  
35 tool 'The short form of kidney disease quality of life' (KDQOL), which is an adaptation of  
36 SF-36.<sup>33</sup> All answers were transformed into pre-coded numeric values with a range from 0-  
37 100, where 100 was the highest QoL.<sup>34</sup> Neither studies offered an overall total score across  
38 the questions/areas, and we selected the two questions/areas that we considered most relevant  
39 (patient satisfaction and dialysis staff encouragement). For both patient satisfaction and  
40 dialysis staff encouragement, Milan et al.<sup>30</sup> found the same score in both groups, while Jung et  
41 al.<sup>29</sup> found a higher score in the RPM group than the control group concerning patient  
42 satisfaction but opposite for dialysis staff encouragement (Table 2).  
43  
44  
45  
46  
47  
48  
49  
50

## 51 **Discussion**

### 52 *Principal findings*

53 This systematic review advances the evidence on the effects of RPM for patients with dialysis  
54 dependent CKD on home dialysis, including home HD and PD. Our findings are in line with  
55 previous research<sup>35 36</sup> and document that there is no conclusive evidence, but that positive  
56 effects of RPM are indicated for clinical outcomes, technical failure, and quality of life.  
57  
58  
59  
60



1  
2  
3 The results consistently suggest that RPM reduces hospitalisations and the number of  
4 days the patient is admitted. It was especially convincing that Milan et al.<sup>30</sup> observed a median  
5 difference of five fewer hospitalisation days in the RPM group over six months, because the  
6 patients on RPM had a worse comorbidity score. Furthermore, except for one study that found  
7 the same number of technical failures in both groups, the other five studies found less  
8 technical failure in the RPM group. In four of the studies measuring this outcome,  
9 prescriptions could be changed from the hospital without in-person consultations. In effect,  
10 RPM allows resolving technical issues early, thus preventing progression of technical failure  
11 to the stage where the patient would need to transfer to a different dialysis modality. Research  
12 has found great advantages with the technology displaying possible causes and solutions to  
13 problems, alarm indicators showing who to contact for guidance (nurse or technician), and  
14 reminders of activities that need to be performed.<sup>13-15</sup> Concerning quality of life, only two  
15 studies assessed this and the results showed the scores were comparable for the patients on  
16 RPM and usual care. Encouragingly, scores for quality of life improved and patient  
17 satisfaction was higher than neutral. This is in line with a study from the U.S. that found that  
18 RPM increased patients' confidence and satisfaction with treatment because they felt more  
19 closely supported.<sup>35</sup> Lastly, no studies assessed time patients use for travel. However, research  
20 suggests that health-related quality of life and time patients use for travel are intertwined<sup>10</sup>  
21 and that dialysis free time and reduction of fatigue are highly valued outcomes by patients.<sup>9 36</sup>  
22  
23  
24  
25  
26  
27  
28  
29  
30  
31  
32  
33  
34  
35  
36  
37  
38  
39  
40  
41  
42  
43  
44  
45  
46  
47  
48  
49  
50  
51  
52  
53  
54  
55  
56  
57  
58  
59  
60

<sup>37</sup> This could reflect positively on quality of life.

Our results mirror two earlier systematic reviews on e-health interventions in PD patients<sup>38</sup> and in people with CKD.<sup>39</sup> Both reviews, with literature searches in 2018-2019, included a wide range of patients and e-health modalities, including mobile or tablet application, text or email messages, electronic monitors, internet/websites, and video or DVD. Consequently, there was minimal overlap in included studies: Only one review<sup>38</sup> included two of our included studies. Both reviews concluded that the quality of evidence for the effectiveness of e-health was low with uncertain effects, but that no adverse effects were indicated. Of note, a recent modelling analysis projected that in a cohort of 100 patients on automated PD over 1 year, RPM would lead to 27 fewer hospitalisations, 518 fewer hospitalization days, 31 additional months free of complications, and six fewer peritonitis episodes.<sup>40</sup>

### *Implications*

Overall, the low to very low certainty of evidence on the effects of RPM for patients with dialysis dependent CKD on home dialysis prevents strong recommendations. Given RPM seems comparable to usual care, the absence of adverse effects and promising clinical effects, it seems advisable cautiously to implement RPM while concomitantly evaluating outcomes important for patients. Prior to recommending RPM for CKD patients on home dialysis, more trials are needed to be certain of its benefits over standard care, and to establish equity and cost effectiveness. A modelling analysis from the payer perspective has found that RPM is cost effective,<sup>40</sup> but economic evaluations of e-health interventions are scarce and highlights an important area for further research.<sup>5 41</sup> Additionally, patient groups should be involved in RPM implementation and evaluation, to maximize the potential for modification and ultimately effect.

Our review highlights the need for robust, high quality research on both PD and home HD, but especially for patients on home HD and patients whose home is in a nursing home. To our knowledge, home HD in nursing homes is rare, while PD is common. It is likely that nursing home staff aided by RPM support from specialist nurses at dialysis centres could provide invaluable assistance to frail CKD patients with great need for follow-up. For such patients and others with dialysis dependent CKD on home dialysis, time used for travel and dialysis free time is a patient-important outcome that warrants further research. It is reasonable to suspect substantial time-savings when follow-up is performed from afar and evidence from video consultations in patient follow-up are positive.<sup>15 42</sup> We encourage research on the combined use of video consultations and cloud-based technology on outcomes such as travel time, technical failure, and hospitalisations.

### *Strengths and limitations*

Our systematic review was conducted in line with guidelines from the Cochrane and Grade working group. The researchers specialise in systematic review research, one researcher is a registered nurse with long and diverse nephrology experience, and the searches were conducted by a search specialist. Yet, it is possible that relevant studies have been missed and relevant studies have been published after our last search. Due to study heterogeneity, inconsistent measurement and reporting, our ability to conduct metaanalyses was limited. Therefore, it was neither possible to improve precision to any great extent, nor statistically assess potential differences across groups, such as type of platform or HD and PD. We contacted several authors asking for more data, but did not receive a reply.

### *Conclusion*

This systematic review summarises and presents low to very low evidence that indicate there may be positive effects of RPM follow-up, in comparison to standard care only, for adult patients with CKD who perform dialysis at home. Offering RPM follow-up for home dialysis patients as an alternative or supplement to standard care appears to be safe and provide health benefits, but future implementation should be coupled with robust, high quality evaluations. Despite the high interest in RPM and increasing demands for nephrology services, good quality evidence is still needed to determine their effectiveness.

### **Contributors**

HN wrote the first draft. RB and HN contributed equally to the rest of the work. LN prepared and conducted the systematic searches and contributed with inputs on the final draft. We are grateful to [removed for blind review], for peer review of the systematic search strategies

### **Competing interests**

'None declared'.

### **Ethics Approval**

Patient and public involvement. Due to the nature of the study (systematic review), no patients were involved.

### **Funding**

'This research received no specific grant from any funding agency in the public, commercial or not-for-profit sectors'.

### **Exclusive licence**

Please confirm you agree with the following statement by ticking the box and then insert the licence statement in your manuscript file.

I, the Submitting Author has the right to grant and does grant on behalf of all authors of the Work (as defined in the below author licence), an exclusive licence and/or a non-exclusive licence for contributions from authors who are: i) UK Crown employees; ii) where BMJ has agreed a CC-BY licence shall apply, and/or iii) in accordance with the terms applicable for US Federal Government officers or employees acting as part of their official duties; on a

worldwide, perpetual, irrevocable, royalty-free basis to BMJ Publishing Group Ltd (“BMJ”) its licensees and where the relevant Journal is co-owned by BMJ to the co-owners of the Journal, to publish the Work in BMJ Open and any other BMJ products and to exploit all rights, as set out in our [licence](#).

The Submitting Author accepts and understands that any supply made under these terms is made by BMJ to the Submitting Author unless you are acting as an employee on behalf of your employer or a postgraduate student of an affiliated institution which is paying any applicable article publishing charge (“APC”) for Open Access articles. Where the Submitting Author wishes to make the Work available on an Open Access basis (and intends to pay the relevant APC), the terms of reuse of such Open Access shall be governed by a Creative Commons licence – details of these licences and which [Creative Commons](#) licence will apply to this Work are set out in our licence referred to above.

#### Data availability statement

Data are available on reasonable request.

#### References

1. Chen TK, Knicely DH, Grams ME. Chronic Kidney Disease Diagnosis and Management: A Review. *JAMA* 2019;322(13):1294-304. doi: 10.1001/jama.2019.14745
2. Tonelli M, Riella M. Chronic kidney disease and the aging population. *Indian journal of nephrology* 2014;24(2):71-74. doi: 10.4103/0971-4065.127881
3. Sinnakirouchenan R, Holley JL. Peritoneal dialysis versus hemodialysis: risks, benefits, and access issues. *Adv Chronic Kidney Dis* 2011;18(6):428-32. doi: 10.1053/j.ackd.2011.09.001 [published Online First: 2011/11/22]
4. Meld. St. 7 (2019–2020). Nasjonal helse- og sykehusplan 2020–2023: Helse- og omsorgsdepartementet; [cited 2021 12.09]. Available from: <https://www.regjeringen.no/no/dokumenter/meld.-st.-7-20192020/id2678667/>
5. Kitsiou S, Paré G, Jaana M, et al. Effectiveness of mHealth interventions for patients with diabetes: An overview of systematic reviews. *PLoS One* 2017;12(3):e0173160. doi: 10.1371/journal.pone.0173160 [published Online First: 2017/03/02]
6. Widmer, R. Jay, et al. "Digital health interventions for the prevention of cardiovascular disease: a systematic review and meta-analysis." *Mayo Clinic Proceedings*. Vol. 90. No. 4. Elsevier, 2015
7. Helsedirektoratet. Nyresvikt - dialysepasienter som får hjemmedialyse: Helsedirektoratet; 2018 [updated 2021 02.12; cited 2021 12.12]. Available from: <https://www.helsedirektoratet.no/statistikk/kvalitetsindikatorer/behandling-av-sykdom-og-overlevelse/andel-dialysepasienter-som-har-hjemmedialyse>
8. Helsedirektoratet. Handlingsplan for forebygging og behandling av kronisk nyresykdom (2011-2015) 2011 [cited 2021 11.09]. Available from:

- [http://www.nephro.no/foreningsnytt/Handlingsplan\\_forebygging\\_behandling\\_kronisk\\_nyresykdom.pdf](http://www.nephro.no/foreningsnytt/Handlingsplan_forebygging_behandling_kronisk_nyresykdom.pdf).
9. Urquhart-Secord R, Craig JC, Hemmelgarn B, et al. Patient and Caregiver Priorities for Outcomes in Hemodialysis: An International Nominal Group Technique Study. *American Journal of Kidney Diseases* 2016;68(3):444-54. doi: <https://doi.org/10.1053/j.ajkd.2016.02.037>
  10. Moist LM, Bragg-Gresham JL, Pisoni RL, et al. Travel Time to Dialysis as a Predictor of Health-Related Quality of Life, Adherence, and Mortality: The Dialysis Outcomes and Practice Patterns Study (DOPPS). *American Journal of Kidney Diseases* 2008;51(4):641-50. doi: <https://doi.org/10.1053/j.ajkd.2007.12.021>
  11. Braut GS. Telemedisin Store medisinske leksikon [updated 2020 15.06; cited 2021 10.10]. Available from: <https://sml.sn.no/telemedisin>.
  12. DelVecchio A. Definition, remote patient monitoring (RPM): Tech target, Search health IT; [updated April 2019; cited 2021 10.10]. Available from: <https://searchhealthit.techtarget.com/definition/remote-patient-monitoring-RPM>
  13. Rajkomar A, Farrington K, Mayer A, et al. Patients' and carers' experiences of interacting with home haemodialysis technology: implications for quality and safety. *BMC Nephrology* 2014;15(1):195-95. doi: 10.1186/1471-2369-15-195
  14. Rygh E, Arild E, Johnsen E, et al. Choosing to live with home dialysis-patients' experiences and potential for telemedicine support: a qualitative study. *BMC Nephrology* 2012;13(1):13-13. doi: 10.1186/1471-2369-13-13
  15. Viglino G, Neri L, Barbieri S, et al. Videodialysis: a pilot experience of telecare for assisted peritoneal dialysis. *J Nephrol* 2020;33(1):177-82. doi: 10.1007/s40620-019-00647-6 [published Online First: 2019/09/19]
  16. François K, Bargman JM. Evaluating the benefits of home-based peritoneal dialysis. *Int J Nephrol Renovasc Dis* 2014;7:447-55. doi: 10.2147/IJNRD.S50527
  17. Marshall MR, Polkinghorne KR, Kerr PG, et al. Temporal Changes in Mortality Risk by Dialysis Modality in the Australian and New Zealand Dialysis Population. *American Journal of Kidney Diseases* 2015;66(3):489-98. doi: <https://doi.org/10.1053/j.ajkd.2015.03.014>
  18. Walker RC, Howard K, Morton RL. Home hemodialysis: a comprehensive review of patient-centered and economic considerations. *Clinicoecon Outcomes Res* 2017;9:149-61. doi: 10.2147/CEOR.S69340
  19. Higgins JPT TJ, Chandler J, Cumpston M, Li T, Page MJ, Welch VA (editors). Cochrane Handbook for Systematic Reviews of Interventions version 6.2 (updated February 2021): Cochrane; 2021 [cited 2021 12.09]. Available from: [www.training.cochrane.org/handbook](http://www.training.cochrane.org/handbook).
  20. PRISMA transparent reporting of systematic reviews and meta-analyses [cited 2021 08.11]. Available from: <http://www.prisma-statement.org/>.
  21. Straus SE, Glasziou P, Richardson WS, et al. Evidence-based medicine E-book: How to practice and teach EBM: Elsevier Health Sciences 2018.
  22. Tonelli M, Wiebe N, Guthrie B, et al. Comorbidity as a driver of adverse outcomes in people with chronic kidney disease. *Kidney International* 2015;88(4):859-66. doi: <https://doi.org/10.1038/ki.2015.228>
  23. Wells GA, Shea B, O'Connell D, et al. The Newcastle-Ottawa Scale (NOS) for assessing the quality of nonrandomised studies in meta-analyses: The Ottawa hospital research institute; [cited 2021 21.10]. Available from: [http://www.ohri.ca/programs/clinical\\_epidemiology/oxford.asp](http://www.ohri.ca/programs/clinical_epidemiology/oxford.asp)

- 1
  - 2
  - 3
  - 4
  - 5
  - 6
  - 7
  - 8
  - 9
  - 10
  - 11
  - 12
  - 13
  - 14
  - 15
  - 16
  - 17
  - 18
  - 19
  - 20
  - 21
  - 22
  - 23
  - 24
  - 25
  - 26
  - 27
  - 28
  - 29
  - 30
  - 31
  - 32
  - 33
  - 34
  - 35
  - 36
  - 37
  - 38
  - 39
  - 40
  - 41
  - 42
  - 43
  - 44
  - 45
  - 46
  - 47
  - 48
  - 49
  - 50
  - 51
  - 52
  - 53
  - 54
  - 55
  - 56
  - 57
  - 58
  - 59
  - 60
24. Cochrane RevMan Cochrane Training [updated Latest version of RevMan 5.4.1. from September 2020; cited 2021 10.10]. Available from: <https://training.cochrane.org/online-learning/core-software-cochrane-reviews/revman>.
25. GRADE: The GRADE Working Group; 2004-2021 [cited 2021 21.10]. Available from: <https://www.gradeworkinggroup.org/>
26. Cao F, Li L, Lin M, et al. Application of instant messaging software in the follow-up of patients using peritoneal dialysis, a randomised controlled trial. *Journal of Clinical Nursing* 2018;27(15-16):3001-07. doi: <https://doi.org/10.1111/jocn.14487>
27. Chaudhuri S, Han H, Muchiutti C, et al. Remote Treatment Monitoring on Hospitalization and Technique Failure Rates in Peritoneal Dialysis Patients. *Kidney360* 2020;1(3):191-202. doi: 10.34067/kid.0000302019
28. Corzo L, Wilkie M, Vesga JI, et al. Technique failure in remote patient monitoring program in patients undergoing automated peritoneal dialysis: A retrospective cohort study. *Perit Dial Int* 2020:896860820982223. doi: 10.1177/0896860820982223 [published Online First: 2021/01/01]
39. Jung HY, Jeon Y, Kim YS, et al. Outcomes of Remote Patient Monitoring for Automated Peritoneal Dialysis: A Randomized Controlled Trial. *Nephron* 2021 doi: 10.1159/000518364
30. Milan Manani S, Baretta M, Giuliani A, et al. Remote monitoring in peritoneal dialysis: benefits on clinical outcomes and on quality of life. *Journal of Nephrology* 2020;33(6):1301-08.
31. Sanabria M, Buitrago G, Lindholm B, et al. Remote Patient Monitoring Program in Automated Peritoneal Dialysis: Impact on Hospitalizations. *Perit Dial Int* 2019;39(5):472-78. doi: 10.3747/pdi.2018.00287 [published Online First: 2019/07/25]
32. Weinhandl ED, Collins AJ. Relative risk of home hemodialysis attrition in patients using a telehealth platform. *Hemodial Int* 2018;22(3):318-27. doi: 10.1111/hdi.12621 [published Online First: 2017/12/07]
33. Wong FK, Chow SK, Chan TM. Evaluation of a nurse-led disease management programme for chronic kidney disease: a randomized controlled trial. *International Journal of Nursing Studies* 2010;47(3):268-78. doi: 10.1016/j.ijnurstu.2009.07.001
34. Kidney Disease Quality of Life Instrument (KDQOL): The RAND Corporation; [cited 2021 14.10]. Available from: [https://www.rand.org/health-care/surveys\\_tools/kdqol.html](https://www.rand.org/health-care/surveys_tools/kdqol.html)
35. Magnus M, Sikka N, Cherian T, et al. Satisfaction and Improvements in Peritoneal Dialysis Outcomes Associated with Telehealth. *Appl Clin Inform* 2017;8(1):214-25. doi: 10.4338/aci-2016-09-ra-0154 [published Online First: 2017/03/02]
36. Manera KE, Johnson DW, Craig JC, et al. Patient and Caregiver Priorities for Outcomes in Peritoneal Dialysis. *Multinational Nominal Group Technique Study* 2019;14(1):74-83. doi: 10.2215/cjn.05380518
37. Evangelidis N, Tong A, Manns B, et al. Developing a Set of Core Outcomes for Trials in Hemodialysis: An International Delphi Survey. *American Journal of Kidney Diseases* 2017;70(4):464-75. doi: 10.1053/j.ajkd.2016.11.029
38. Cartwright EJ, Z ZSG, Foo M, et al. eHealth interventions to support patients in delivering and managing peritoneal dialysis at home: A systematic review. *Peritoneal Dialysis International* 2021;41(1):32-41.
39. Stevenson JK, Campbell ZC, Webster AC, et al. eHealth interventions for people with chronic kidney disease. *Cochrane Database of Systematic Reviews* 2019(8) doi: 10.1002/14651858.CD012379.pub2

- 1  
2  
3 40. Ariza JG, Walton SM, Sanabria M, et al. Evaluating a remote patient monitoring program  
4 for automated peritoneal dialysis. *Perit Dial Int* 2020;40(4):377-83. doi:  
5 10.1177/0896860819896880 [published Online First: 2020/02/18]  
6  
7 41. Sanyal C, Stolee P, Juzwishin D, et al. Economic evaluations of eHealth technologies: A  
8 systematic review. *PLoS One* 2018;13(6):e0198112. doi:  
9 10.1371/journal.pone.0198112 [published Online First: 2018/06/14]  
10  
11 42. Gallar P, Vigil A, Rodriguez I, et al. Two-year experience with telemedicine in the  
12 follow-up of patients in home peritoneal dialysis. *Journal of Telemedicine & Telecare*  
13 2007;13(6):288-92. doi: 10.1258/135763307781644906  
14  
15  
16

17 **Figure legend:**

18  
19 **Figure 1:** Prisma flow diagram for selection of studies  
20  
21

22 **Figure 2:** Metaanalyses of outcomes disease specific hospitalisations and technical failure  
23  
24  
25  
26  
27  
28  
29  
30  
31  
32  
33  
34  
35  
36  
37  
38  
39  
40  
41  
42  
43  
44  
45  
46  
47  
48  
49  
50  
51  
52  
53  
54  
55  
56  
57  
58  
59  
60

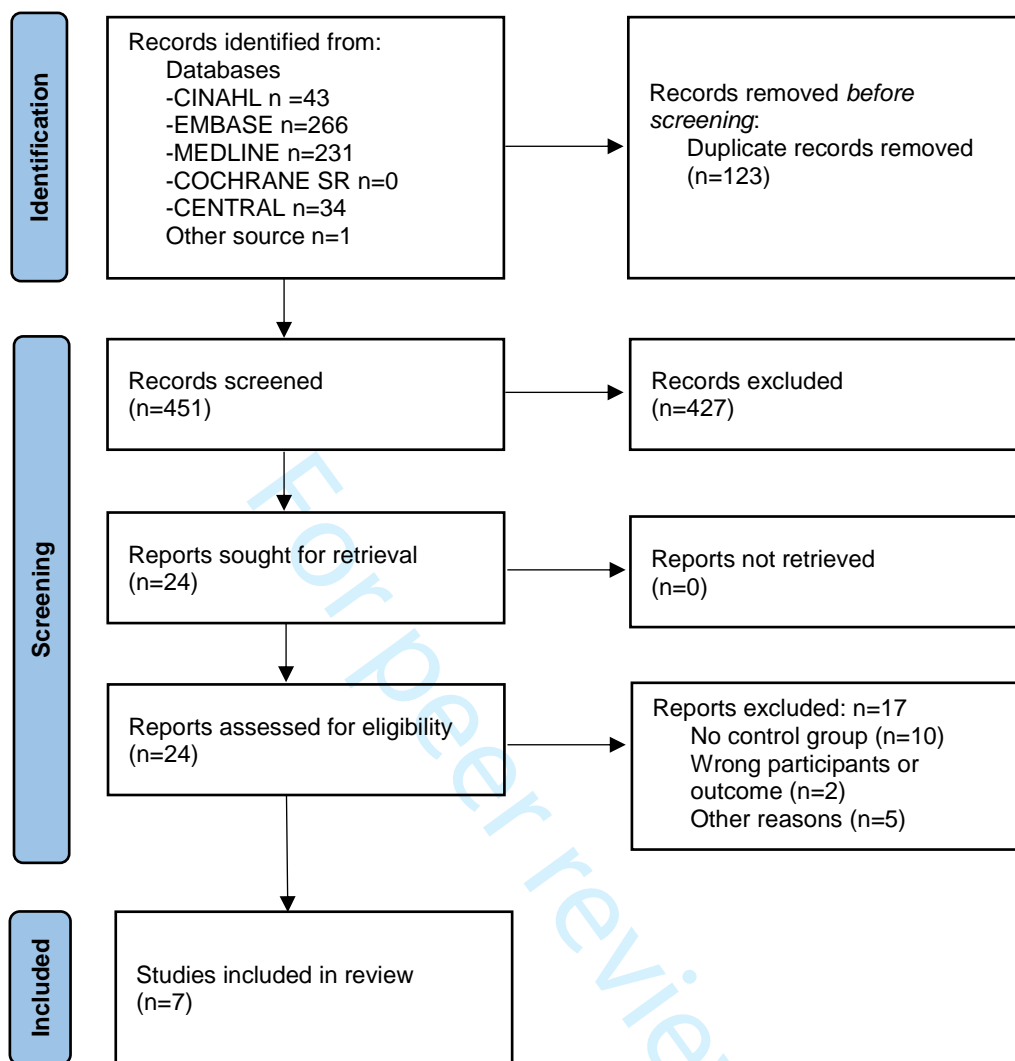



## (a) Disease specific hospitalisations

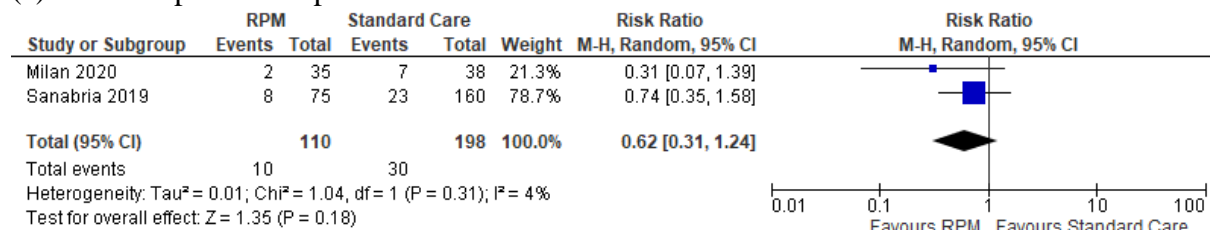

## (b) Technical failure

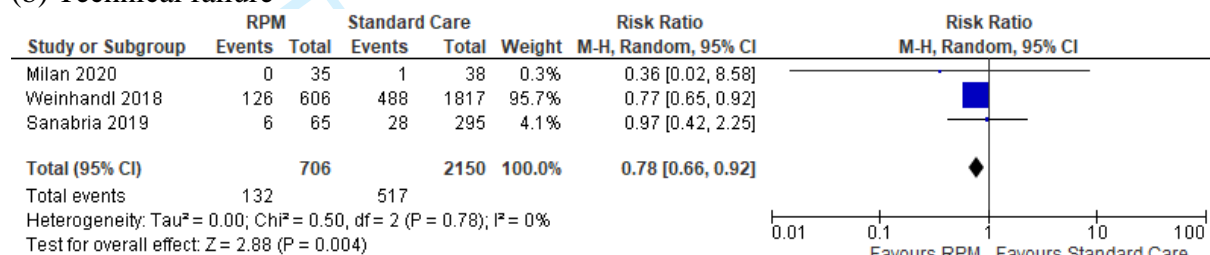

**Supplemental Appendix 1: Search strategies**

Date: 23.08.2021

Searches conducted by: Lien Nguyen

Search strategies peer reviewed by: Elisabet Hafstad

| Database                                                         | Number of hits |
|------------------------------------------------------------------|----------------|
| Embase <1974 to 2021 August 20> (OVID)                           | 266            |
| Ovid MEDLINE(R) ALL <1946 to August 20, 2021>                    | 231            |
| Cochrane Library of Systematic Reviews (Cochrane Library; Wiley) | 0              |
| CENTRAL(Cochrane Library; Wiley)                                 | 34             |
| CINAHL (EBSCO)                                                   | 43             |
| Total number of references                                       | 574            |
| Total after duplicate removal                                    | 451            |

**Database: Embase****Search interface: Advanced Search**

- 1 exp telehealth/ 60896
- 2 exp telecommunication/ 87729
- 3 exp health care delivery/ 3564027
- 4 2 and 3 65304
- 5 (telecare\* or teleconsult\* or telefollow\* or telehealth\* or telehome\* or telemanag\* or telemedicine or telemonitor\* or telenurs\* or telepatient\* or telesupport\*).ti,ab,kw,bt. 33953
- 6 ((tele or telemedical\* or tele medical\*) adj (care\* or checkup\* or check up\* or consult\* or followup\* or follow up\* or health\* or home\* or manag\* or medicine\* or monitor\* or nurs\* or patient\* or support\*)).ti,ab,kw,bt. 1853
- 7 (ecare or econsult\* or ehealth or emedicine\* or enurs\* or mcare or mconsult\* or mhealth or mnurse or mcare or mnursing or mconsult\* or mnurs\*).ti,ab,kw,bt. 10706
- 8 ((e or m or mobile or digital) adj (care or consult\* or health\* or nurs\*)).ti,ab,kw,bt. 15428
- 9 (remote adj2 (care\* or checkup\* or check up\* or consult\* or followup\* or follow up\* or health\* or home\* or manag\* or medicine\* or monitor\* or nursing or patient\* or self)).ti,ab,kw,bt. 12293
- 10 1 or 4 or 5 or 6 or 7 or 8 or 9 92070
- 11 hemodialysis/ 115843
- 12 exp peritoneal dialysis/ 44307
- 13 home dialysis/ 2966
- 14 (((dialysis or hemodialysis or haemodialysis) adj4 home?) or peritoneal dialysis).ti,ab,kw,bt. 37655

1  
2  
3 15 (CAPD or APD or HHD).ti. 3524  
4  
5 16 or/11-15 151629  
6  
7 17 10 and 16 534  
8  
9 18 limit 17 to yr=2000-current 516  
10  
11 19 (exp animals/ or exp invertebrate/ or animal experiment/ or animal model/ or animal tissue/  
12 or animal cell/ or nonhuman/) not (human/ or normal human/ or human cell/) 6724645  
13  
14 20 editorial.pt. 699530  
15  
16 21 18 not (19 or 20) 494  
17  
18 22 limit 21 to embase 270  
19  
20 23 remove duplicates from 22 266  
21  
22

23 **Database: OVID MEDLINE**

24 **Search interface: Advanced Search**

25  
26  
27  
28  
29 1 Telemedicine/ 29751  
30  
31 2 Telenursing/ 232  
32  
33 3 Remote Consultation/ 5273  
34  
35 4 or/1-3 34165  
36  
37 5 exp Telecommunications/ 108428  
38  
39 6 (care or healthcare).hw. 1324775  
40  
41 7 5 and 6 19771  
42  
43 8 4 or 7 42042  
44  
45 9 (telecare\* or teleconsult\* or telefollow\* or telehealth\* or telehome\* or telemanag\* or  
46 telemedicine or telemonitor\* or telenurs\* or telepatient\* or telesupport\*).ti,ab,kf,bt. 26067  
47  
48 10 ((tele or telemedical\* or tele medical\*) adj (care\* or checkup\* or check up\* or consult\* or  
49 followup\* or follow up\* or health\* or home\* or manag\* or medicine\* or monitor\* or nurs\*  
50 or patient\* or support\*)).ti,ab,kf,bt. 1020  
51  
52 11 (ecare or econsult\* or ehealth or emedicine\* or enurs\* or mcare or mconsult\* or mhealth or  
53 mnurse or mcare or mnursing or mconsult\* or mnurs\*).ti,ab,kf,bt. 10618  
54  
55 12 ((e or m or mobile or digital) adj (care or consult\* or health\* or nurs\*)).ti,ab,kf,bt. 13372  
56  
57 13 (remote adj2 (care\* or checkup\* or check up\* or consult\* or followup\* or follow up\* or  
58 health\* or home\* or manag\* or medicine\* or monitor\* or nursing or patient\* or  
59 self)).ti,ab,kf,bt. 8231  
60  
61 14 or/8-13 69186

1  
2  
3 15 Renal Dialysis/ 94819  
4  
5 16 Hemodialysis, Home/ 2013  
6  
7 17 exp Peritoneal Dialysis/ 26840  
8  
9 18 (((dialysis or hemodialysis or haemodialysis) adj4 home?) or peritoneal dialysis).ti,ab,kf,bt.  
10 28202  
11  
12 19 (CAPD or APD or HHD).ti. 2685  
13  
14 20 or/15-19 121750  
15  
16 21 14 and 20 271  
17  
18 22 limit 21 to yr=2000-current 243  
19  
20 23 exp animals/ not humans/ 4877030  
21  
22 24 (news or editorial or comment).pt. 1512750  
23  
24 25 22 not (23 or 24) 231  
25  
26 26 remove duplicates from 25 231

27  
28  
29 **Database: Cochrane Database of Systematic Review & CENTRAL**

30 **Search interface: Advanced Search > Search Manager**

31  
32  
33  
34 ID Search Hits  
35  
36 #1 [mh ^telemedicine] 2414  
37  
38 #2 [mh ^telenursing] 31  
39  
40 #3 [mh ^"remote consultation"] 381  
41  
42 #4 #1 or #2 or #3 2777  
43  
44 #5 [mh telecommunications] 7362  
45  
46 #6 [mh ^"delivery of health care"] 806  
47  
48 #7 [mh ^"health services"] 458  
49  
50 #8 #5 and (#6 or #7) 139  
51  
52 #9 #4 or #8 2838  
53  
54 #10 (telecare\* or teleconsult\* or telefollow\* or telehealth\* or telehome\* or telemanag\* or  
55 telemedicine or telemonitor\* or telenurs\* or telepatient\* or telesupport\*):ti,ab,kw 7370  
56  
57 #11 ((tele or telemedical\* or tele-medical\*) NEXT (care\* or checkup\* or check-up\* or consult\* or  
58 followup\* or follow-up\* or health\* or home\* or manag\* or medicine\* or monitor\* or nurs\*  
59 or patient\* or support\*)):ti,ab,kw 446  
60

- 1  
2  
3 #12 (ecare or econsult\* or ehealth or emedicine\* or enurs\* or mcare or mconsult\* or mhealth or  
4 mnurse or mcare or mnursing or mconsult\* or mnurs\*):ti,ab,kw 2547  
5  
6 #13 ((e or m or mobile or digital) NEXT (care or consult\* or health\* or nurs\*)):ti,ab,kw 3725  
7  
8 #14 (remote NEAR/2 (care\* or checkup\* or check-up\* or consult\* or followup\* or follow-up\* or  
9 health\* or home\* or manag\* or medicine\* or monitor\* or nursing or patient\* or  
10 self)):ti,ab,kw 1743  
11  
12 #15 {or #9-#14} 11340  
13  
14 #16 [mh ^"Renal Dialysis"] 4322  
15  
16 #17 [mh ^"hemodialysis, home"] 43  
17  
18 #18 [mh "Peritoneal Dialysis"] 900  
19  
20 #19 (((dialysis or hemodialysis or haemodialysis) NEAR/4 home?) or "peritoneal dialysis"):ti,ab,kw  
21 2491  
22  
23 #20 (CAPD or APD or HHD):ti 409  
24  
25 #21 {or #16-#20} 6775  
26  
27 #22 #15 and #21 with Cochrane Library publication date Between Jan 2000 and Aug 2021, in  
28 Cochrane Reviews 0  
29  
30 #23 #15 and #21 with Publication Year from 2000 to 2021, in Trials 34  
31  
32  
33  
34  
35  
36  
37  
38  
39  
40  
41  
42  
43  
44  
45  
46  
47  
48  
49  
50  
51  
52  
53  
54  
55  
56  
57  
58  
59  
60

**Database: CINAHL**

**Search interface: Advanced Search**

**Supplemental Appendix 2:** Description of the studies' risk of bias

Risk of bias for the RCTs

|           | Random sequence generation (selection bias) | Allocation concealment (selection bias) | Blinding of participants and personnel (performance bias) | Blinding of outcome assessment (detection bias) | Incomplete outcome data (attrition bias) | Selective reporting (reporting bias) | Other bias |
|-----------|---------------------------------------------|-----------------------------------------|-----------------------------------------------------------|-------------------------------------------------|------------------------------------------|--------------------------------------|------------|
| Cao 2018  | +                                           | ?                                       | ?                                                         | ?                                               | +                                        | ?                                    | +          |
| Jung 2021 | +                                           | ?                                       | -                                                         | -                                               | +                                        | +                                    | +          |

Risk of bias for the retrospective cohort studies

| Study                 | Selection |     |     |    | Comparability | Outcome |     |     | Stars:<br>Quality |
|-----------------------|-----------|-----|-----|----|---------------|---------|-----|-----|-------------------|
|                       | 1         | 2   | 3   | 4  |               | 1       | 2   | 3   |                   |
| <b>Chaudhuri 2020</b> | 1b*       | 2a* | 3a* | 4b | 1ab**         | 1b*     | 2a* | 3d  | 7: Good           |
| <b>Corzo 2020</b>     | 1b*       | 2a* | 3a* | 4b | 1ab**         | 1b*     | 2a* | 3b* | 9: Good           |
| <b>Milan 2020</b>     | 1c        | 2a* | 3a* | 4b | 1-            | 1b*     | 2a* | 3b* | 6: Fair           |
| <b>Sanabrina 2019</b> | 1b*       | 2a* | 3a* | 4b | 1ab           | 1b*     | 2a* | 3b* | 9: Good           |
| <b>Weinhandl 2018</b> | 1b*       | 2a* | 3a* | 4b | 1ab**         | 1b*     | 2a* | 3d  | 7: Good           |

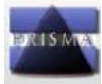

## PRISMA 2020 Checklist

| Section and Topic             | Item # | Checklist item                                                                                                                                                                                                                                                                                       | Location where item is reported |
|-------------------------------|--------|------------------------------------------------------------------------------------------------------------------------------------------------------------------------------------------------------------------------------------------------------------------------------------------------------|---------------------------------|
| <b>TITLE</b>                  |        |                                                                                                                                                                                                                                                                                                      |                                 |
| Title                         | 1      | Identify the report as a systematic review.                                                                                                                                                                                                                                                          | p. 1                            |
| <b>ABSTRACT</b>               |        |                                                                                                                                                                                                                                                                                                      |                                 |
| Abstract                      | 2      | See the PRISMA 2020 for Abstracts checklist.                                                                                                                                                                                                                                                         | p. 2                            |
| <b>INTRODUCTION</b>           |        |                                                                                                                                                                                                                                                                                                      |                                 |
| Rationale                     | 3      | Describe the rationale for the review in the context of existing knowledge.                                                                                                                                                                                                                          | p. 3-4                          |
| Objectives                    | 4      | Provide an explicit statement of the objective(s) or question(s) the review addresses.                                                                                                                                                                                                               | p. 4                            |
| <b>METHODS</b>                |        |                                                                                                                                                                                                                                                                                                      |                                 |
| Eligibility criteria          | 5      | Specify the inclusion and exclusion criteria for the review and how studies were grouped for the syntheses.                                                                                                                                                                                          | p. 4-6                          |
| Information sources           | 6      | Specify all databases, registers, websites, organisations, reference lists and other sources searched or consulted to identify studies. Specify the date when each source was last searched or consulted.                                                                                            | p. 4 & supplement file 1        |
| Search strategy               | 7      | Present the full search strategies for all databases, registers and websites, including any filters and limits used.                                                                                                                                                                                 | Supplement file 1               |
| Selection process             | 8      | Specify the methods used to decide whether a study met the inclusion criteria of the review, including how many reviewers screened each record and each report retrieved, whether they worked independently, and if applicable, details of automation tools used in the process.                     | p. 5                            |
| Data collection process       | 9      | Specify the methods used to collect data from reports, including how many reviewers collected data from each report, whether they worked independently, any processes for obtaining or confirming data from study investigators, and if applicable, details of automation tools used in the process. | p. 6                            |
| Data items                    | 10a    | List and define all outcomes for which data were sought. Specify whether all results that were compatible with each outcome domain in each study were sought (e.g. for all measures, time points, analyses), and if not, the methods used to decide which results to collect.                        | p. 5-6                          |
|                               | 10b    | List and define all other variables for which data were sought (e.g. participant and intervention characteristics, funding sources). Describe any assumptions made about any missing or unclear information.                                                                                         | p. 6                            |
| Study risk of bias assessment | 11     | Specify the methods used to assess risk of bias in the included studies, including details of the tool(s) used, how many reviewers assessed each study and whether they worked independently, and if applicable, details of automation tools used in the process.                                    | p. 5-6                          |
| Effect measures               | 12     | Specify for each outcome the effect measure(s) (e.g. risk ratio, mean difference) used in the synthesis or presentation of results.                                                                                                                                                                  | p. 6                            |
| Synthesis methods             | 13a    | Describe the processes used to decide which studies were eligible for each synthesis (e.g. tabulating the study intervention characteristics and comparing against the planned groups for each synthesis (item #5)).                                                                                 | p. 6                            |
|                               | 13b    | Describe any methods required to prepare the data for presentation or synthesis, such as handling of missing summary statistics, or data conversions.                                                                                                                                                | NA                              |
|                               | 13c    | Describe any methods used to tabulate or visually display results of individual studies and syntheses.                                                                                                                                                                                               | p. 6                            |
|                               | 13d    | Describe any methods used to synthesize results and provide a rationale for the choice(s). If meta-analysis was performed, describe the model(s), method(s) to identify the presence and extent of statistical heterogeneity, and software package(s) used.                                          | p. 6                            |
|                               | 13e    | Describe any methods used to explore possible causes of heterogeneity among study results (e.g. subgroup analysis, meta-regression).                                                                                                                                                                 | NA                              |
|                               | 13f    | Describe any sensitivity analyses conducted to assess robustness of the synthesized results.                                                                                                                                                                                                         | NA                              |
| Reporting bias assessment     | 14     | Describe any methods used to assess risk of bias due to missing results in a synthesis (arising from reporting biases).                                                                                                                                                                              | NA                              |



## PRISMA 2020 Checklist

| Section and Topic                              | Item # | Checklist item                                                                                                                                                                                                                                                                                                                                                                           | Location where item is reported |
|------------------------------------------------|--------|------------------------------------------------------------------------------------------------------------------------------------------------------------------------------------------------------------------------------------------------------------------------------------------------------------------------------------------------------------------------------------------|---------------------------------|
| Certainty assessment                           | 15     | Describe any methods used to assess certainty (or confidence) in the body of evidence for an outcome.                                                                                                                                                                                                                                                                                    | p. 6                            |
| <b>RESULTS</b>                                 |        |                                                                                                                                                                                                                                                                                                                                                                                          |                                 |
| Study selection                                | 16a    | Describe the results of the search and selection process, from the number of records identified in the search to the number of studies included in the review, ideally using a flow diagram.                                                                                                                                                                                             | Figure 1 & p. 7                 |
|                                                | 16b    | Cite studies that might appear to meet the inclusion criteria, but which were excluded, and explain why they were excluded.                                                                                                                                                                                                                                                              | p. 7                            |
| Study characteristics                          | 17     | Cite each included study and present its characteristics.                                                                                                                                                                                                                                                                                                                                | Table 1 & p. 7                  |
| Risk of bias in studies                        | 18     | Present assessments of risk of bias for each included study.                                                                                                                                                                                                                                                                                                                             | Supplement file 2               |
| Results of individual studies                  | 19     | For all outcomes, present, for each study: (a) summary statistics for each group (where appropriate) and (b) an effect estimate and its precision (e.g. confidence/credible interval), ideally using structured tables or plots.                                                                                                                                                         | Figure 2 & table 2              |
| Results of syntheses                           | 20a    | For each synthesis, briefly summarise the characteristics and risk of bias among contributing studies.                                                                                                                                                                                                                                                                                   | p. 9                            |
|                                                | 20b    | Present results of all statistical syntheses conducted. If meta-analysis was done, present for each the summary estimate and its precision (e.g. confidence/credible interval) and measures of statistical heterogeneity. If comparing groups, describe the direction of the effect.                                                                                                     | p. 9 & Figure 2                 |
|                                                | 20c    | Present results of all investigations of possible causes of heterogeneity among study results.                                                                                                                                                                                                                                                                                           | NA                              |
|                                                | 20d    | Present results of all sensitivity analyses conducted to assess the robustness of the synthesized results.                                                                                                                                                                                                                                                                               | NA                              |
| Reporting biases                               | 21     | Present assessments of risk of bias due to missing results (arising from reporting biases) for each synthesis assessed.                                                                                                                                                                                                                                                                  | NA                              |
| Certainty of evidence                          | 22     | Present assessments of certainty (or confidence) in the body of evidence for each outcome assessed.                                                                                                                                                                                                                                                                                      | Table 3                         |
| <b>DISCUSSION</b>                              |        |                                                                                                                                                                                                                                                                                                                                                                                          |                                 |
| Discussion                                     | 23a    | Provide a general interpretation of the results in the context of other evidence.                                                                                                                                                                                                                                                                                                        | p. 10-11                        |
|                                                | 23b    | Discuss any limitations of the evidence included in the review.                                                                                                                                                                                                                                                                                                                          | p. 11-12                        |
|                                                | 23c    | Discuss any limitations of the review processes used.                                                                                                                                                                                                                                                                                                                                    | p. 11-12                        |
|                                                | 23d    | Discuss implications of the results for practice, policy, and future research.                                                                                                                                                                                                                                                                                                           | p. 11                           |
| <b>OTHER INFORMATION</b>                       |        |                                                                                                                                                                                                                                                                                                                                                                                          |                                 |
| Registration and protocol                      | 24a    | Provide registration information for the review, including register name and registration number, or state that the review was not registered.                                                                                                                                                                                                                                           | p. 2 & 4                        |
|                                                | 24b    | Indicate where the review protocol can be accessed, or state that a protocol was not prepared.                                                                                                                                                                                                                                                                                           | p. 2 & 4                        |
|                                                | 24c    | Describe and explain any amendments to information provided at registration or in the protocol.                                                                                                                                                                                                                                                                                          | p. 6                            |
| Support                                        | 25     | Describe sources of financial or non-financial support for the review, and the role of the funders or sponsors in the review.                                                                                                                                                                                                                                                            | No support for review           |
| Competing interests                            | 26     | Declare any competing interests of review authors.                                                                                                                                                                                                                                                                                                                                       | No conflicts to declare         |
| Availability of data, code and other materials | 27     | Report which of the following are publicly available and where they can be found: template data collection forms; data extracted from included studies; data used for all analyses; analytic code; any other materials used in the review.<br>For peer review only - <a href="http://bmjopen.bmj.com/site/about/guidelines.xhtml">http://bmjopen.bmj.com/site/about/guidelines.xhtml</a> | Available on request            |



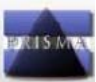

# PRISMA 2020 Checklist

- 1
- 2
- 3
- 4
- 5
- 6
- 7
- 8
- 9
- 10
- 11
- 12
- 13
- 14
- 15
- 16
- 17
- 18
- 19
- 20
- 21
- 22
- 23
- 24
- 25
- 26
- 27
- 28
- 29
- 30
- 31
- 32
- 33
- 34
- 35
- 36
- 37
- 38
- 39
- 40
- 41
- 42
- 43
- 44
- 45
- 46
- 47

From: Page MJ, McKenzie JE, Bossuyt PM, Boutron I, Hoffmann TC, Mulrow CD, et al. The PRISMA 2020 statement: an updated guideline for reporting systematic reviews. BMJ 2021;372:n71. doi: 10.1136/bmj.n71  
 For more information, visit: <http://www.prisma-statement.org/>

For peer review only

# BMJ Open

## Effect of remote patient monitoring for patients with chronic kidney disease who perform dialysis at home: a systematic review

|                                 |                                                                                                                                                                                                                                                                                               |
|---------------------------------|-----------------------------------------------------------------------------------------------------------------------------------------------------------------------------------------------------------------------------------------------------------------------------------------------|
| Journal:                        | <i>BMJ Open</i>                                                                                                                                                                                                                                                                               |
| Manuscript ID                   | bmjopen-2022-061772.R1                                                                                                                                                                                                                                                                        |
| Article Type:                   | Original research                                                                                                                                                                                                                                                                             |
| Date Submitted by the Author:   | 02-May-2022                                                                                                                                                                                                                                                                                   |
| Complete List of Authors:       | Nygård, Henriette; Norwegian Institute of Public Health, Health; University of Tromso Department of Community Medicine<br>Nguyen, Lien; Norwegian Institute of Public Health<br>Berg , Rigmor C ; Norwegian Institute of Public Health; University of Tromso Department of Community Medicine |
| <b>Primary Subject Heading</b>: | Renal medicine                                                                                                                                                                                                                                                                                |
| Secondary Subject Heading:      | Health informatics, Health services research, Nursing, Patient-centred medicine, Renal medicine                                                                                                                                                                                               |
| Keywords:                       | Telemedicine < BIOTECHNOLOGY & BIOINFORMATICS, Dialysis < NEPHROLOGY, End stage renal failure < NEPHROLOGY, Adult nephrology < NEPHROLOGY, Chronic renal failure < NEPHROLOGY, Health informatics < BIOTECHNOLOGY & BIOINFORMATICS                                                            |
|                                 |                                                                                                                                                                                                                                                                                               |

SCHOLARONE™  
Manuscripts



I, the Submitting Author has the right to grant and does grant on behalf of all authors of the Work (as defined in the below author licence), an exclusive licence and/or a non-exclusive licence for contributions from authors who are: i) UK Crown employees; ii) where BMJ has agreed a CC-BY licence shall apply, and/or iii) in accordance with the terms applicable for US Federal Government officers or employees acting as part of their official duties; on a worldwide, perpetual, irrevocable, royalty-free basis to BMJ Publishing Group Ltd ("BMJ") its licensees and where the relevant Journal is co-owned by BMJ to the co-owners of the Journal, to publish the Work in this journal and any other BMJ products and to exploit all rights, as set out in our [licence](#).

The Submitting Author accepts and understands that any supply made under these terms is made by BMJ to the Submitting Author unless you are acting as an employee on behalf of your employer or a postgraduate student of an affiliated institution which is paying any applicable article publishing charge ("APC") for Open Access articles. Where the Submitting Author wishes to make the Work available on an Open Access basis (and intends to pay the relevant APC), the terms of reuse of such Open Access shall be governed by a Creative Commons licence – details of these licences and which [Creative Commons](#) licence will apply to this Work are set out in our licence referred to above.

Other than as permitted in any relevant BMJ Author's Self Archiving Policies, I confirm this Work has not been accepted for publication elsewhere, is not being considered for publication elsewhere and does not duplicate material already published. I confirm all authors consent to publication of this Work and authorise the granting of this licence.

1  
2  
3 1 **Title**  
4

5 2 Effect of remote patient monitoring for patients with chronic kidney disease who perform  
6 3 dialysis at home: a systematic review  
7  
8

9  
10 4 **Corresponding author**  
11

12 5 Henriette Tyse Nygård, Buggemyra 1, 5378 Klokkevik, Norway. hettny@gmail.com  
13

14 6 **Authors**  
15

16  
17 7 Henriette Tyse Nygård, Norwegian Institute of Public Health, Oslo, Norway, University of  
18 8 Tromsø, Tromsø, Norway, and Haukeland University Hospital, Bergen, Norway  
19

20  
21 9 Lien H. Nguyen, Norwegian Institute of Public Health, Oslo, Norway  
22

23 10 Rigmor C Berg, Norwegian Institute of Public Health, Oslo, Norway, and University of  
24 11 Tromsø, Tromsø, Norway  
25  
26

27 12 **Acknowledgements:** We are grateful to Elisabet Hafstad, Norwegian Institute of Public  
28 13 Health, for peer review of the systematic search strategies  
29  
30

31 14  
32

33  
34 15 **Word count:** 3998  
35

36 16  
37  
38  
39  
40  
41  
42  
43  
44  
45  
46  
47  
48  
49  
50  
51  
52  
53  
54  
55  
56  
57  
58  
59  
60

1  
2  
3 1  
45 2 **Abstract**

6  
7 3 **Objective:** The purpose of the systematic review was to assess the effectiveness of remote  
8 4 patient monitoring (RPM) follow-up compared to standard care, for patients with chronic  
9 5 kidney disease (CKD) who perform dialysis at home.

10  
11  
12 6 **Methods:** We conducted a systematic review in accordance with international guidelines. We  
13 7 performed systematic searches for publications from 2015-2021 in five databases (e.g.  
14 8 Medline, Cinahl, Embase) and a search for grey literature in reference lists. Included effect  
15 9 measures were quality of life, hospitalisation, technical failure as the cause for transfer to a  
16 10 different dialysis modality, infections, and time patients use for travel. Screening of literature,  
17 11 data extraction, risk of bias assessment, and certainty of evidence assessment (using the  
18 12 Grading of Recommendations Assessment, Development, and Evaluation approach) were  
19 13 done by two researchers. We conducted metaanalyses when possible.

20  
21  
22 14 **Results:** Seven studies met the inclusion criteria, of which two were randomised controlled  
23 15 trials and five were retrospective cohort studies with control groups. The studies included  
24 16 9,975 participants from five countries, who were a good representation of dialysis patients in  
25 17 high- and upper-middle-income countries. The patients were on peritoneal dialysis (six  
26 18 studies) or home hemodialysis (one study). There was very low certainty of evidence for the  
27 19 outcomes, except for hospitalisations: There was low certainty evidence from three cohort  
28 20 studies for fewer hospitalisation days in the RPM group. No studies included data for time  
29 21 patients used for travel.

30  
31  
32 22 **Conclusion:** We found low to very low certainty evidence that indicate there may be positive  
33 23 effects of RPM follow-up, in comparison to standard care only, for adult patients with CKD  
34 24 who perform dialysis at home. Offering RPM follow-up for home dialysis patients as an  
35 25 alternative or supplement to standard care appears to be safe and provide health benefits such  
36 26 as fewer hospitalisation days. Future implementation should be coupled with robust, high  
37 27 quality evaluations.

38 28 **Protocol:** Pre-registered in PROSPERO (CRD42021281779).

39 29 **Strength and limitations of this study**

- 40  
41  
42 30 - To our knowledge, this is the first systematic review to assess the effectiveness and  
43 31 safety of remote patient monitoring follow-up for adult patients with dialysis-

1 dependent chronic kidney disease on home dialysis (hemodialysis and peritoneal  
2 dialysis).

- 3 - Our systematic review was conducted in line with guidelines from the Cochrane and  
4 GRADE working group. The researchers specialise in systematic review research, one  
5 researcher is a registered nurse with long and diverse nephology experience, and the  
6 searches were conducted by a search specialist.
- 7 - Due to study heterogeneity, inconsistent measurement and reporting, our ability to  
8 conduct metaanalyses was limited.

## 10 Introduction

11 Chronic kidney disease (CKD) is a significant public health concern, with 8-16% of the  
12 world's population affected.<sup>1</sup> It is characterised by a need for close monitoring, poor health  
13 outcomes, and a high economic burden for society as well as for the individual.<sup>2</sup> The world's  
14 population is growing older, and with CKD prevalence rising parallel with age,<sup>2</sup> an increasing  
15 number of people will continue to need monitoring and treatment with dialysis. There are two  
16 main types of dialysis: Peritoneal dialysis (PD) and hemodialysis (HD). Both are suitable  
17 treatment options when the kidneys are unable to filter the blood sufficiently.<sup>3</sup>

18 With the use of technology, there are encouraging possibilities for thorough patient  
19 follow-up, and at the same time, human resource savings.<sup>4-6</sup> Both PD and HD can be  
20 performed at home. With home dialysis, the patients receive comprehensive training arranged  
21 by staff at a dialysis centre to ensure that they have the skills and knowledge required to  
22 perform the treatment at home.<sup>3 7</sup> While dialysis is time-consuming regardless of location,  
23 patients on home dialysis are not dependent on hospital service hours and may experience  
24 more freedom than patients receiving in-centre dialysis.<sup>8 9</sup> Additionally, for patients on in-  
25 centre dialysis, the burden of time spent commuting between home and hospital can be  
26 extensive. They often also spend a substantial amount of time waiting for transport and  
27 waiting to be assisted by hospital staff for connection and disconnection from HD. Research  
28 shows that travel time to dialysis exceeding 60 minutes is associated with significantly  
29 decreased health-related quality of life (QoL) and significantly increased mortality risk  
30 compared to patients who travel 15 minutes or less.<sup>10</sup> With dialysis at home, it is reasonable to  
31 expect considerable time savings for the patients as well as improved health-related QoL.

1  
2  
3 1 In healthcare there is increasing interest in utilising technology-based interventions.  
4  
5 2 Telemedicine and e-health are broad terms used when medical treatment, examination, or  
6  
7 3 patient follow-up is done from a distance.<sup>11</sup> Homecare telehealth is another related term, and  
8  
9 4 remote patient monitoring (RPM) is a subcategory thereof. RPM uses computer systems or  
10  
11 5 software application technology that transfers patient-generated data to healthcare  
12  
13 6 professionals.<sup>12</sup> Given the intervention considered in this systematic review is internet  
14  
15 7 dependent, we will use the term RPM. RPM can give the patient quick access to medical  
16  
17 8 expertise, independent of the distance to a treatment centre, and provides healthcare teams  
18  
19 9 with valuable information about the patient's condition. Thus, RPM can be a tool to empower  
20  
21 10 patients in self-care and for healthcare providers to offer support from a distance.<sup>11</sup>  
22  
23 11 Qualitative studies from the U.K. and Norway suggest that patients on home dialysis have a  
24  
25 12 positive attitude towards the use of RPM and believe that this could decrease anxiety and  
26  
27 13 make it easier for more patients to choose home dialysis.<sup>13 14</sup> In a recent pilot study from Italy,  
28  
29 14 patients overcame physical, cognitive, and psychological barriers to PD by RPM follow-up.<sup>15</sup>

30  
31 15 Strategies to switch more patients to home dialysis may have positive impacts on the  
32  
33 16 patients' daily life,<sup>14 16</sup> decrease mortality,<sup>17</sup> and offer economic savings for the patients as  
34  
35 17 well as for society.<sup>16 18</sup> RPM holds much promise for enhancing follow up of CKD patients on  
36  
37 18 dialysis and it is critical to determine whether and which strategies are effective at improving  
38  
39 19 outcomes. RPM patient follow-up is seemingly already expanding its reach. Our Google  
40  
41 20 Scholar search in December 2021 showed that there has been a 200% increase in records  
42  
43 21 about e-health home dialysis from 2018 to 2021. Although interest in nephrology and e-  
44  
45 22 health, including RPM, is increasing, to date, there are no systematic reviews about the  
46  
47 23 effectiveness and safety of RPM follow-up including adult patients with dialysis-dependent  
48  
49 24 CKD on home dialysis (HD and PD). We aimed to conduct a systematic review on the  
50  
51 25 effectiveness of RPM follow-up compared to standard care, for adult patients with CKD who  
52  
53 26 perform dialysis at home.

## 54 27 **Methods**

55 28 We conducted this systematic review in accordance with guidelines set forth in the Cochrane  
56  
57 29 Handbook for Systematic Reviews of Interventions version 6.2.<sup>19</sup> The pre-specified protocol  
58  
59 30 was registered in PROSPERO (CRD42021281779) and we report in line with the Preferred  
60  
31 Reporting for Systematic Reviews and Metaanalyses (PRISMA) statement.<sup>20</sup>

### 1 *Search strategy and selection*

2 The reviewers (HN, RB) prepared the search strategy in collaboration with a research  
3 librarian (LN), and a second research librarian peer-reviewed the search strategy. The  
4 librarian (LN) conducted searches in August 2021 in CINAHL (EBSCO), EMBASE (OVID),  
5 Medline (OVID), Cochrane Database of Systematic Reviews, and CENTRAL. The search  
6 included both subject headings (e.g. MeSH in Medline) and text words. Available  
7 Supplemental Appendix 1. In addition, the two reviewers conducted hand searches in the  
8 reference lists of the included studies.

9 The basis for the search was the inclusion criteria. We applied the (S)PICO model,  
10 which directs attention to the study design, population, intervention, comparison, and  
11 outcomes.<sup>21</sup> Eligible study designs were primary intervention studies with a control group.  
12 That is, randomised controlled trials (RCTs), non-randomised controlled studies, controlled  
13 before-after studies, and cohort studies with a control group. Study participants needed to be  
14 18 years or older, with dialysis dependent CKD who performed dialysis at home (HD or PD).  
15 The patients could perform dialysis independently or with assistance of family or other carers.  
16 CKD did not have to be the only disease of the study participant. This is because patients with  
17 CKD are known to have a higher burden of comorbidities than the average population.<sup>22</sup> The  
18 eligible intervention was RPM, understood as internet dependent technology used to transfer  
19 treatment data from the patient's home to a healthcare institution.<sup>12</sup> This included video  
20 consultations, applications installed on the patient's phone, computer, or a tablet as well as  
21 technology that transferred treatment data directly from the dialysis machine to healthcare  
22 providers.<sup>12</sup> RPM that was not directly treatment related was excluded. This included, but was  
23 not limited to, apps for lifestyle changes, interventions for blood pressure control, and  
24 interventions for diabetes management. The comparator was standard care, understood as  
25 patients performing dialysis in-centre or at home and having regular in-person consultations at  
26 a HD or PD centre. Included effect measures were QoL (measured with any type of QoL  
27 assessment tool), hospitalisation (all-cause, disease-specific, and number of hospitalisation  
28 days), technical failure as the cause for transfer to a different dialysis modality, hospital  
29 registered infections not requiring hospitalisation, and time patients use for travel. Lastly,  
30 studies had to be published in a Scandinavian or English language, in 2015-2021 because we  
31 wanted to identify all studies relevant to the question and today's clinical situation, being  
32 cognisant that technology is rapidly improving.



1 We imported all records from the searches into an EndNote library and removed all  
2 duplicate entries. Two researchers (HN, RB) independently screened all titles and abstracts  
3 from the literature searches in accordance with the predetermined inclusion and exclusion  
4 criteria. All abstracts that appeared to fit the inclusion criteria or did not provide enough  
5 information, were promoted to full text screening. At each level, we evaluated the identified  
6 records independently of one another using a pre-developed inclusion form. The final  
7 determination to include or exclude was made together and any disagreements were solved by  
8 discussion. Excluded studies with justifications are available in Supplemental Appendix 2.

### 9 *Risk of bias assessment and data extraction*

10 To assess the included studies for risk of bias (RoB) we used two different instruments: The  
11 Newcastle-Ottawa scale for cohort studies,<sup>23</sup> and Cochrane Risk of Bias Tool for RCTs.<sup>19</sup>  
12 Two researchers (HN, RB) conducted independent risk of bias assessments and then agreed  
13 on a final RoB evaluation, with disagreements solved by discussion.

14 One researcher (HN) created a standard extraction form and extracted data from all  
15 included studies. The information extracted from the studies was: title, authors, publication  
16 details, study design, aim of the study, study setting (location and time the study was  
17 conducted), characteristics of included participants (age, gender etc.), characteristics of the  
18 intervention, study setting, outcomes, and results. Whenever information was available,  
19 dichotomous and continuous data for all eligible outcomes were extracted. HN contacted  
20 several authors for additional data, but did not receive a reply. RB assessed the extracted data  
21 for completeness and accuracy and any disagreements were solved by further inspection of  
22 the publication and discussion.

### 23 *Analysis and assessment of the certainty of the evidence (GRADE)*

24 We extracted crude outcome data for all eligible outcomes when postscores for both  
25 intervention and control groups were available and, when such data were available, adjusted  
26 outcome data (adjusted comparison (effect) estimates and their standard errors or 95%  
27 confidence intervals, CI). We provide dichotomous outcomes as the number of events and  
28 number of people in groups as proportions, risk ratio (RR), incident RR (IRR) or odds ratio  
29 (OR) as appropriate. Continuous outcomes are shown as mean difference (MD) and standard  
30 deviations (SD), or the most appropriate presentation based on the available data in the  
31 included studies.

1 We evaluated the characteristics of the studies' (S)PICO and when they were  
2 considered sufficiently similar, and data were available, we conducted metaanalyses. The  
3 judgments about whether metaanalyses were appropriate were based on recommendations in  
4 the Cochrane Handbook.<sup>19</sup> We used Mantel-Haenszel random effects metaanalysis for  
5 dichotomous outcomes and we presented the relative risks and their corresponding 95% CI (it  
6 was not possible to metaanalyse any continuous outcomes). We also examined between-study  
7 heterogeneity using visual inspection of CIs, the Chi-square test, and Isquare statistic,  
8 quantifying the degree of heterogeneity as described in the Cochrane Handbook.<sup>19</sup> We used  
9 RevMan version 5.4, the latest version of the Cochrane metaanalysis software.<sup>24</sup> When the  
10 studies' (S)PICOs or results were too heterogeneous to pool statistically, or data were  
11 unavailable, we reported the results narratively, in text and tables. We planned to perform a  
12 subgroup analysis for the outcome technical failure, but this was not possible due to lack of  
13 data.

14 We assessed the certainty of the evidence using the Grading of Recommendations  
15 Assessment, Development and Evaluation (GRADE) framework.<sup>25</sup> With regard to results that  
16 could not be metaanalysed, we followed the Synthesis Without Meta-analysis (SWiM)  
17 guideline.<sup>26</sup>

## 18 **Results**

19 The searches returned 451 references after removal of duplicates (Figure 1). We read 24  
20 reports in full text, including one study identified from the hand search in reference lists. The  
21 most common primary reasons for exclusion were that there was no control group or it was  
22 the wrong participants or outcomes. Seven studies published between 2018-2021 were  
23 eligible for inclusion.<sup>27-33</sup>

### 24 *Description of the studies*

25 The seven included studies consisted of two RCTs and five retrospective cohort studies (Table  
26 1). They were conducted in five different countries. There were two studies each from  
27 Columbia and USA, and one study each from China, Italy, and South Korea. Three were set  
28 in a single PD centre, four took place in two or more renal care centres and the two largest  
29 studies took place in the USA with one including 55 home HD centres and another 931  
30 Fresenius PD clinics.

### 32 **Table 1: Description of the included studies (n=7)**

| Author, (country, setting) Study design                                        | Population                               | Intervention and comparator (follow-up time)                                                              | Outcomes                                            | Risk of bias     |
|--------------------------------------------------------------------------------|------------------------------------------|-----------------------------------------------------------------------------------------------------------|-----------------------------------------------------|------------------|
| Cao 2018 <sup>27</sup><br>(China: 1 PD centre) RCT                             | N=160, on CAPD<br>Men 58%<br>Mean age 52 | RPM vs SC<br>Instant messaging application for support and education (mean 11.4 mo FU)                    | Hospitalisations<br>Infections<br>Technical failure | Moderate         |
| Chaudhuri 2020 <sup>28</sup><br>(USA: 931 renal centres) Cohort                | N=6343, on PD<br>Men 73%<br>Mean age 57  | RPM vs SC<br>“Patient hub” application - patients add and access treatment data (12 mo FU)                | Hospitalisations<br>Technical failure               | Low              |
| Corzo 2020 <sup>29</sup><br>(Columbia: 5 renal centres) Cohort                 | N=558, on APD<br>Men 60%<br>Mean age 54  | RPM vs SC<br>Cloud-based software - prescriptions can be changed remotely (mean 8.3 mo FU)                | Technical failure                                   | Low              |
| Jung 2021 <sup>30</sup><br>(South Korea: 6 renal centres) RCT                  | N=57, on APD<br>Men 60%<br>Mean age 47   | RPM vs SC<br>Cloud-based software - prescriptions can be changed remotely (6 mo FU)                       | QoL                                                 | Moderate         |
| Milan 2020 <sup>31</sup><br>(Italy: 1 PD centre) Cohort                        | N=73, on APD<br>Men 75%<br>Median age 60 | RPM vs SC<br>Cloud-based software - prescriptions can be changed remotely (6 mo FU)                       | Hospitalisations<br>Technical failure<br>QoL        | Low/<br>Moderate |
| Sanabria 2019 <sup>32</sup><br>(Columbia: 28 Baxter renal care centres) Cohort | N=360, on APD<br>Men 66%<br>Mean age 57  | RPM vs SC<br>Cloud-based software - prescriptions can be changed remotely (Mean 9 mo FU)                  | Hospitalisations<br>Technical failure               | Low              |
| Weinhandl 2018 <sup>33</sup><br>(USA: 55 HHD centres) Cohort                   | N=2424, on HHD<br>Men 63%<br>Mean age 53 | RPM vs SC<br>Nx2me telehealth platform - staff can do remote ‘troubleshooting’ during HHD (Mean 11 mo FU) | Technical failure                                   | Low              |

Legend: APD=Automated peritoneal dialysis; CAPD=Continuous peritoneal dialysis; FU=Follow-up; HHD=Home hemodialysis; mo=Months; PD=Peritoneal dialysis; QoL=Quality of life; RCT=Randomised controlled trial; RPM=Remote patient monitoring; SC=Standard care

With respect to the population, all in all, there were 9,975 dialysis-dependent CKD patients in the studies. The range was 57-6343 patients, thus there was imbalance in sample sizes across the studies. The two largest studies, cohorts from the USA, made up 88% of the total number of study participants. In all the studies most patients were male (range 53%-75%) and the mean age of the study participants was about 55. In all studies except one, the patients were on PD, they lived at home, and performed dialysis independently or with the assistance of a carer.

1 As per our inclusion criteria, the intervention was remote patient monitoring with  
2 different types of software that collected treatment data and transferred it to a treatment centre  
3 (added by the patients or automatically collected). The specific type of RPM varied across the  
4 studies. Four studies, Corzo et al.,<sup>29</sup> Jung et al.,<sup>30</sup> Milan et al.<sup>31</sup> and Sanabria et al.<sup>32</sup> used the  
5 automated PD system from Baxter: Homechoice Claria™, connected to the Sharesource  
6 platform. Milan et al.<sup>31</sup> additionally used the sleep-safe harmony home bridge system from  
7 Fresenius for half of the patients. Weinhandl & Collins<sup>33</sup> used the Nx2me telehealth platform  
8 for home HD patients. The software collects treatment data and transmits it to the healthcare  
9 providers, and the prescription can be changed ‘from afar’. Chaudhuri et al.<sup>28</sup> used the  
10 “Patient hub” application. The PD patients can see their prescription, laboratory results, and  
11 enter treatment data, and the app transmits the patient-entered data to the healthcare providers.  
12 Cao et al.<sup>27</sup> used the “kidney cleaning group” instant messaging software. Technical support,  
13 nurse support, physician support, and support from fellow patients was available through chat  
14 and video. The patients were divided in smaller groups and one experienced PD patient with  
15 few complications was the group leader. Educational resources were also available in the  
16 platform. In addition, in all studies, all patients had or were likely to receive some level of  
17 standard care. This was generally described as in-person follow-up at the hospital. However,  
18 the frequency of standard care ranged from weekly (n=1) to every three months (n=1). Most  
19 studies had or were likely to have an in-person review monthly (n=5). The follow-up time  
20 ranged from 6 to 12 months.

### 21 *Risk of bias of included studies*

22 The RCTs had moderate risk of bias, while the retrospective cohort studies were rated fair to  
23 good methodological quality, i.e. having low to moderate risk of bias (Table 1 and  
24 Supplemental Appendix 3). With respect to the studies’ sources of funding, three of the  
25 observational studies received financial support from the provider of the intervention  
26 (Supplemental Appendix 3).

### 27 *Effect of RPM versus standard care*

28 Across the studies, there were data on four of our five pre-determined outcomes:  
29 Hospitalisation,<sup>27 28 31 32</sup> infections,<sup>27</sup> technical failure as the cause for transfer to a different  
30 dialysis modality,<sup>27-29 31-33</sup> and QoL.<sup>30 31</sup> Due to the inconsistent measurement of outcomes,  
31 and inconsistent and incomplete reporting of outcome results in the studies, our ability to  
32 synthesise data was limited. The results are described in the text below, Table 2, and Figure 2.  
33 The GRADE assessments in Table 3 show that there was low to very low certainty of

1 evidence for all of the outcomes. This means that the effects are largely uncertain. No  
 2 publications included data for the outcome ‘time patients used for travel’.

3 **Table 2. Study outcomes and effect estimates**

| Study                                                                           | Outcome                                      | Result/Effect estimate (95% CI)                                                                                                          |
|---------------------------------------------------------------------------------|----------------------------------------------|------------------------------------------------------------------------------------------------------------------------------------------|
| <b>Hospitalisations</b>                                                         |                                              |                                                                                                                                          |
| Chaudhuri 2020                                                                  | Hospitalisation days (12 mo)                 | Adj. IRR 0.68 (0.55-0.83)                                                                                                                |
| Milan 2020                                                                      | Hospitalisation days (6 mo)                  | Median 5 days difference P 0.55                                                                                                          |
| Sanabria 2019                                                                   | Hospitalisation days (9 mo)                  | Adj. IRR 0.46 (0.23-0.92)                                                                                                                |
| Cao 2018                                                                        | Hospitalisation all-cause (11 mo)            | RR 0.57 (0.17-1.88)                                                                                                                      |
| Chaudhuri 2020                                                                  | Hospitalisation all-cause (12 mo)            | Adj. IRR 0.74 (0.66-0.83)                                                                                                                |
| Milan 2020                                                                      | Hospitalisation all-cause (11 mo)            | RR 1.33 (0.63-2.81)                                                                                                                      |
| Sanabria 2019                                                                   | Hospitalisation all-cause (9 mo)             | Adj. IRR 0.61 (0.39-0.95)                                                                                                                |
| <b>Infections</b>                                                               |                                              |                                                                                                                                          |
| Cao 2018                                                                        | Infections (11 mo)                           | More peritonitis (60 in RPM group vs 40 in control group per patient month) but less exit site infections with RPM (RR= 0.45, 0.12-1.68) |
| <b>Technical failure as cause for transfer to a different dialysis modality</b> |                                              |                                                                                                                                          |
| Cao 2018                                                                        | Technical failure (11 mo)                    | RR 1.00 (0.26-3.86)                                                                                                                      |
| Chaudhuri 2020                                                                  | Technical failure (12 mo)                    | Adj. HR 0.79 (0.63-1.00)                                                                                                                 |
| Corzo 2020                                                                      | Technical failure (8 mo)                     | IRR 0.88 (0.41-1.74)                                                                                                                     |
| Sanabria 2019                                                                   | Technical failure (subgroup) (9 mo)          | RR 0.97 (0.42-2.25)                                                                                                                      |
| Weinhandl 2018                                                                  | Technical failure (subgroup) (11 mo)         | Adj. HR 0.66 (0.50-0.86)                                                                                                                 |
| <b>Quality of life</b>                                                          |                                              |                                                                                                                                          |
| Jung 2021                                                                       | KDQOL -Patient satisfaction questions (6 mo) | Mean 75.5 in RPM group vs 73.7 in SC group, P 0.64                                                                                       |
| Milan 2020                                                                      | KDQOL -Patient satisfaction questions (6 mo) | Median 83.3 in both groups, P 0.99                                                                                                       |
| Jung 2021                                                                       | KDQOL -Dialysis staff encouragement (6 mo)   | Mean 93.1 in RPM group vs 97.1 in SC group, P 0.05                                                                                       |
| Milan 2020                                                                      | KDQOL -Dialysis staff encouragement (6 mo)   | Median 100 in both groups, P 0.16                                                                                                        |

4 Legend: Adj=Adjusted (listed in Supplemental Appendix 3); HR=Hazard ratio; IRR=Incident  
 5 rate ratio (compares the incidence rates between two different groups and shows if exposure  
 6 to something increases or decreases the rate of some incidence -- if IRR is 1 then there is no  
 7 difference); mo=Months; KDQOL=kidney disease quality of life; RPM=Remote patient  
 8 monitoring; RR=Relative risk; SC=Standard care

10 **Table 3: Summary of findings (GRADE)**

**Population:** Patients with CKD  
**Countries:** China, Columbia, Italy, South Korea, USA  
**Intervention:** RPM  
**Comparison:** Standard care

| Outcome, follow-up time                | Anticipated absolute effects* (95% CI)                                                                    |                       | Relative effect (95% CI) | No. of participants (Studies) | Quality of evidence (GRADE)   |
|----------------------------------------|-----------------------------------------------------------------------------------------------------------|-----------------------|--------------------------|-------------------------------|-------------------------------|
|                                        | Assumed risk with control                                                                                 | Assumed risk with RPM |                          |                               |                               |
| <b>Hospitalisations (6-12 months)</b>  |                                                                                                           |                       |                          |                               |                               |
| Days                                   | All 3 cohort studies showed that there were fewer hospitalisation days in the RPM group (Table 2)         |                       |                          | 6,736 (3)                     | ⊕⊕○○<br>LOW                   |
| All-cause                              | 3 of 4 studies (1 RCT, 3 cohort) showed that there were fewer hospitalisations in the RPM group (Table 2) |                       |                          | 6,936 (4)                     | ⊕○○○<br>VERY LOW <sup>1</sup> |
| Disease-specific                       | 30/198 (15.2%)                                                                                            | 10/110 (9.1%)         | RR 0.62 (0.31 to 1.24)   | 308 (2 cohort)                | ⊕○○○<br>VERY LOW <sup>2</sup> |
| <b>Infections (11 months)</b>          |                                                                                                           |                       |                          |                               |                               |
|                                        | 1 RCT reported more peritonitis but fewer exit site infections with RPM (Table 2)                         |                       |                          | 160 (1)                       | ⊕○○○<br>VERY LOW <sup>3</sup> |
| <b>Technical failure (6-12 months)</b> |                                                                                                           |                       |                          |                               |                               |
|                                        | 521/2230 (23.4%)                                                                                          | 136/786 (17.3%)       | RR 0.78 (0.66 to 0.93)   | 2856 (3 cohort)               | ⊕○○○<br>VERY LOW <sup>4</sup> |
|                                        | 2 of 3 studies (1 RCT, 2 cohort) reported fewer failures with RPM (Table 2)                               |                       |                          | 7161 (3)                      |                               |
| <b>Quality of life (6 months)</b>      |                                                                                                           |                       |                          |                               |                               |
| Patient satisfaction                   | 1 RCT found higher QoL in the RPM group, 1 cohort found QoL was similar in the two groups (Table 2)       |                       |                          | 130 (2)                       | ⊕○○○<br>VERY LOW <sup>5</sup> |

|                                                                                                                                                                                                                                                                                                                                                                                                                         |                                                                                                     |         |                               |
|-------------------------------------------------------------------------------------------------------------------------------------------------------------------------------------------------------------------------------------------------------------------------------------------------------------------------------------------------------------------------------------------------------------------------|-----------------------------------------------------------------------------------------------------|---------|-------------------------------|
| Dialysis staff encouragement                                                                                                                                                                                                                                                                                                                                                                                            | 1 RCT found higher QoL in the RPM group, 1 cohort found QoL was similar in the two groups (Table 2) | 130 (2) | ⊕○○○<br>VERY LOW <sup>5</sup> |
| <b>Travel time</b>                                                                                                                                                                                                                                                                                                                                                                                                      | 0 studies assess this outcome                                                                       |         | No evidence                   |
| <p>1. Downgraded by 1 level because of moderate risk of bias in 1 study and inconsistency</p> <p>2. Downgraded by 1 level because of imprecision</p> <p>3. Downgraded by 3 levels because of moderate risk of bias, inconsistency, imprecision</p> <p>4. Downgraded by 1 level because of moderate risk of bias in 1 study and imprecision</p> <p>5. Downgraded by 1 level because of inconsistency and imprecision</p> |                                                                                                     |         |                               |
| <p>CI: Confidence interval; RCT: Randomised controlled study; SD: Standard deviation. *The risk in the intervention group (and its 95% confidence interval) is based on the assumed risk in the comparison group and the relative effect of the intervention (and its 95% CI).</p>                                                                                                                                      |                                                                                                     |         |                               |

## Hospitalisations

One RCTs and three observational studies from Italy, Colombia, China, and the USA examined the effect of RPM on hospitalisations.<sup>27 28 31 32</sup> However, the outcome was reported differently across the studies, as hospitalisation days/days admitted, all-cause hospitalisations, and disease-specific hospitalisations (caused by overhydration, access dysfunction, and infections).

Hospitalisation days. The three observational studies, Chaudhuri et al.,<sup>28</sup> Milan et al.,<sup>31</sup> and Sanabria et al.<sup>32</sup>, all found fewer hospitalisation days in the RPM group than the control group (Table 2). The results in Sanabria et al.<sup>32</sup> were from a matched sample, as data for the whole sample was not available. This study showed the largest effect with a difference of six hospitalisation days (IRR 0.46, 0.23-0.92).

All-cause hospitalisations. One RCT<sup>27</sup> and three observational studies<sup>28 31 32</sup> had data on general, all-cause hospitalisations. While three of the four studies showed that RPM users had less all-cause hospitalisations than patients with standard care only, the fourth study favoured standard care (Table 2).

Disease-specific hospitalisations. The results on disease-specific hospitalisations from two observational studies, Milan et al.,<sup>31</sup> and Sanabria et al.<sup>32</sup> could be pooled in a metaanalysis (Figure 2). The non-significant result suggested there were fewer disease-specific hospitalisations in the RPM group than in the control group (RR 0.62, 95% CI 0.31-1.24).

1 Milan et al.<sup>31</sup> defined disease-specific hospitalisations as infections (peritonitis and exit site),  
2 overhydration, and access dysfunction. Sanabria et al.<sup>32</sup> provided numbers for hospitalisations  
3 due to peritonitis and overhydration.

#### 4 Infections

5 Only one RCT, from China, examined the effectiveness of RPM follow-up for PD patients on  
6 infections.<sup>27</sup> The result for this outcome was inconclusive, as Cao et al. found more peritonitis  
7 but fewer exit site infections with RPM. It was not specified whether the infections were  
8 treated at home or in the hospital.

#### 9 Technical failure as the cause for transfer to a different dialysis modality

10 One RCT from China<sup>27</sup> found no difference between the groups while five observational  
11 studies from the USA<sup>28 33</sup>, Colombia<sup>29 32</sup>, and Italy<sup>31</sup> consistently reported less technical  
12 failure as cause for transfer to a different dialysis modality in the RPM group compared to the  
13 control group (Table 2). Three of the cohort studies could be pooled in a metaanalysis; the  
14 result implies benefit of RPM (0.78, 95% CI 0.66, 0.92) (Figure 2). Two of the studies<sup>32 33</sup>  
15 gave data on novice patients with less than three months treatment duration at baseline,  
16 indicating a positive, but non-significant effect of RPM in new patients (Table 2).

#### 17 Self-reported Quality of Life

18 Both studies, one RCT<sup>30</sup> and one observational study,<sup>31</sup> reporting on quality of life used the  
19 tool 'The short form of kidney disease quality of life' (KDQOL), which is an adaptation of  
20 SF-36.<sup>34</sup> All answers were transformed into pre-coded numeric values with a range from 0-  
21 100, where 100 was the highest QoL.<sup>35</sup> Neither studies offered an overall total score across  
22 the questions/areas, and we selected the two questions/areas that we considered most relevant  
23 (patient satisfaction and dialysis staff encouragement). For both patient satisfaction and  
24 dialysis staff encouragement, Milan et al.<sup>31</sup> found the same score in both groups, while Jung et  
25 al.<sup>30</sup> found a higher score in the RPM group than the control group concerning patient  
26 satisfaction, but opposite for dialysis staff encouragement (Table 2).

### 27 **Discussion**

#### 28 *Principal findings*

29 This systematic review advances the evidence on the effects of RPM for patients with dialysis  
30 dependent CKD on home dialysis, including home HD and PD. Our findings are in line with  
31 previous research<sup>36 37</sup> and document that there is no conclusive evidence, but that positive  
32 effects of RPM are indicated for clinical outcomes, technical failure, and quality of life.



1  
2  
3 1 The results consistently suggest that RPM reduces hospitalisations and the number of  
4 2 days the patient is admitted. It was especially convincing that Milan et al.<sup>31</sup> observed a median  
5 3 difference of five fewer hospitalisation days in the RPM group over six months, because the  
6 4 patients on RPM had a worse comorbidity score. Furthermore, except for one study that found  
7 5 the same number of technical failures in both groups, the other five studies found less  
8 6 technical failure in the RPM group. In four of the studies measuring this outcome,  
9 7 prescriptions could be changed from the hospital without in-person consultations. In effect,  
10 8 RPM allows resolving technical issues early, thus preventing progression of technical failure  
11 9 to the stage where the patient would need to transfer to a different dialysis modality. Research  
12 10 has found great advantages with the technology displaying possible causes and solutions to  
13 11 problems, alarm indicators showing who to contact for guidance (nurse or technician), and  
14 12 reminders of activities that need to be performed.<sup>14-16</sup> Concerning quality of life, only two  
15 13 studies assessed this and the results showed the scores were comparable for the patients on  
16 14 RPM and usual care. Encouragingly, scores for quality of life improved slightly and patient  
17 15 satisfaction was higher than neutral. This is in line with a study from the U.S. that found that  
18 16 RPM increased patients' confidence and satisfaction with treatment because they felt more  
19 17 closely supported.<sup>36</sup> Lastly, no studies assessed time patients use for travel. However, research  
20 18 suggests that health-related quality of life and time patients use for travel are intertwined<sup>11</sup>  
21 19 and that dialysis free time and reduction of fatigue are highly valued outcomes by patients.<sup>10 37</sup>  
22 20 <sup>38</sup> This could reflect positively on quality of life.

21 21 Our results mirror two earlier systematic reviews on e-health interventions in PD  
22 22 patients<sup>39</sup> and in people with CKD.<sup>40</sup> Both reviews, with literature searches in 2018-2019,  
23 23 included a wide range of patients and e-health modalities, including mobile or tablet  
24 24 application, text or email messages, electronic monitors, internet/websites, and video or DVD.  
25 25 Consequently, there was minimal overlap in included studies: Only one review<sup>39</sup> included two  
26 26 of our included studies. Both reviews concluded that the quality of evidence for the  
27 27 effectiveness of e-health was low with uncertain effects, but that no adverse effects were  
28 28 indicated. Of note, a recent modelling analysis projected that in a cohort of 100 patients on  
29 29 automated PD over 1 year, RPM would lead to 27 fewer hospitalisations, 518 fewer  
30 30 hospitalization days, 31 additional months free of complications, and six fewer peritonitis  
31 31 episodes.<sup>41</sup>

### 1 *Implications*

2 Overall, the low to very low certainty of evidence on the effects of RPM for patients with  
3 dialysis dependent CKD on home dialysis prevents strong recommendations. Given RPM  
4 seems comparable to usual care, the absence of adverse effects and promising clinical effects,  
5 it seems advisable cautiously to implement RPM while concomitantly evaluating outcomes  
6 important for patients. Prior to recommending RPM for CKD patients on home dialysis, more  
7 trials are needed to be certain of its benefits over standard care, and to establish equity and  
8 cost effectiveness. A modelling analysis from the payer perspective has found that RPM is  
9 cost effective,<sup>41</sup> but economic evaluations of e-health interventions are scarce and highlights  
10 an important area for further research.<sup>6 42</sup> Additionally, patient groups should be involved in  
11 RPM implementation and evaluation, to maximize the potential for modification and  
12 ultimately effect.

13 Our review highlights the need for robust, high quality research on both PD and home  
14 HD, but especially for patients on home HD and patients whose home is in a nursing home.  
15 To our knowledge, home HD in nursing homes is rare, while PD is common. It is likely that  
16 nursing home staff aided by RPM support from specialist nurses at dialysis centres could  
17 provide invaluable assistance to frail CKD patients with great need for follow-up. For such  
18 patients and others with dialysis dependent CKD on home dialysis, time used for travel and  
19 dialysis free time is a patient-important outcome that warrants further research. It is  
20 reasonable to suspect substantial time-savings when follow-up is performed from afar and  
21 evidence from video consultations in patient follow-up are positive.<sup>16 43</sup> We encourage  
22 research on the combined use of video consultations and cloud-based technology on outcomes  
23 such as travel time, technical failure, and hospitalisations. Standardised outcomes in  
24 nephrology (SONG) have identified and prioritised outcomes for both HD and PD patients  
25 and can be a useful tool when planning outcomes in future research.<sup>44</sup>

### 26 *Strengths and limitations*

27 Our systematic review was conducted in line with guidelines from the Cochrane and GRADE  
28 working group. The outcome selection was in alignment with core outcomes recommended by  
29 the SONG initiative.<sup>44</sup> The researchers specialise in systematic review research, one  
30 researcher is a registered nurse with long and diverse nephrology experience, and the searches  
31 were conducted by a search specialist. Yet, it is possible that relevant studies have been  
32 missed and relevant studies have been published after our last search. Due to study  
33 heterogeneity, variability in intervention characteristics, inconsistent measurement and

1 reporting, our ability to conduct metaanalyses was limited. Therefore, it was neither possible  
2 to improve precision to any great extent, nor statistically assess potential differences across  
3 groups, such as type of platform or HD and PD. We contacted several authors asking for more  
4 data, but did not receive a reply. The low number of studies meant that we were unable to  
5 statistically check for publication bias. Given the modestly positive but varied results, we  
6 believe the potential for publication bias is low, but we recommend future reviews of a higher  
7 number of included studies to assess this potential bias. The imbalance in sample sizes across  
8 the studies, with two studies having a considerably larger sample size than the other five,  
9 influenced the results related to hospitalisations and technical failure. Both these two studies  
10 had low risk of bias, but three other studies had moderate risk of bias.

### 11 *Conclusion*

12 This systematic review summarises and presents low to very low evidence that indicate there  
13 may be positive effects of RPM follow-up, in comparison to standard care only, for adult  
14 patients with CKD who perform dialysis at home. Offering RPM follow-up for home dialysis  
15 patients as an alternative or supplement to standard care appears to be safe and provide health  
16 benefits, but future implementation should be coupled with robust, high quality evaluations.  
17 Despite the high interest in RPM and increasing demands for nephrology services, good  
18 quality evidence is still needed to determine their effectiveness.

### 20 **Contributors**

21 HN wrote the first draft. RB and HN contributed equally to the rest of the work. LN prepared  
22 and conducted the systematic searches and contributed with inputs on the final draft. We are  
23 grateful to [removed for blind review], for peer review of the systematic search strategies

### 24 **Competing interests**

25 'None declared'.

### 26 **Funding**

27 'This research received no specific grant from any funding agency in the public, commercial  
28 or not-for-profit sectors'.

### 29 **Patient and public involvement**

30 Due to the nature of the study (systematic review), no patients were involved.

## 2 Exclusive licence

3 Please confirm you agree with the following statement by ticking the box and then insert the  
4 licence statement in your manuscript file.

5 I, the Submitting Author has the right to grant and does grant on behalf of all authors of the  
6 Work (as defined in the below author licence), an exclusive licence and/or a non-exclusive  
7 licence for contributions from authors who are: i) UK Crown employees; ii) where BMJ has  
8 agreed a CC-BY licence shall apply, and/or iii) in accordance with the terms applicable for  
9 US Federal Government officers or employees acting as part of their official duties; on a  
10 worldwide, perpetual, irrevocable, royalty-free basis to BMJ Publishing Group Ltd (“BMJ”)  
11 its licensees and where the relevant Journal is co-owned by BMJ to the co-owners of the  
12 Journal, to publish the Work in BMJ Open and any other BMJ products and to exploit all  
13 rights, as set out in our licence.

14  
15 The Submitting Author accepts and understands that any supply made under these terms is  
16 made by BMJ to the Submitting Author unless you are acting as an employee on behalf of  
17 your employer or a postgraduate student of an affiliated institution which is paying any  
18 applicable article publishing charge (“APC”) for Open Access articles. Where the Submitting  
19 Author wishes to make the Work available on an Open Access basis (and intends to pay the  
20 relevant APC), the terms of reuse of such Open Access shall be governed by a Creative  
21 Commons licence – details of these licences and which Creative Commons licence will apply  
22 to this Work are set out in our licence referred to above.

## 23 Data availability statement

24 Data are available on reasonable request.

## 26 References

- 27 1. Chen TK, Knicely DH, Grams ME. Chronic Kidney Disease Diagnosis and Management:  
28 A Review. *JAMA* 2019;322(13):1294-304. doi: 10.1001/jama.2019.14745
- 29 2. Tonelli M, Riella M. Chronic kidney disease and the aging population. *Indian journal of*  
30 *nephrology* 2014;24(2):71-74. doi: 10.4103/0971-4065.127881
- 31 3. Sinnakirouchenan R, Holley JL. Peritoneal dialysis versus hemodialysis: risks, benefits,  
32 and access issues. *Adv Chronic Kidney Dis* 2011;18(6):428-32. doi:  
33 10.1053/j.ackd.2011.09.001 [published Online First: 2011/11/22]

- 1 4. Meld. St. 7 (2019–2020). Nasjonal helse- og sykehusplan 2020–2023: Helse- og  
2 omsorgsdepartementet; [cited 2021 12.09]. Available from:  
3 <https://www.regjeringen.no/no/dokumenter/meld.-st.-7-20192020/id2678667/>
- 4 5. Kitsiou S, Paré G, Jaana M, et al. Effectiveness of mHealth interventions for patients with  
5 diabetes: An overview of systematic reviews. *PLoS One* 2017;12(3):e0173160. doi:  
6 10.1371/journal.pone.0173160 [published Online First: 2017/03/02]
- 7 6. Widmer, R. Jay, et al. "Digital health interventions for the prevention of cardiovascular  
8 disease: a systematic review and meta-analysis." *Mayo Clinic Proceedings*. Vol. 90.  
9 No. 4. Elsevier, 2015
- 10 7. Helsedirektoratet. Nyresvikt - dialysepasienter som får hjemmedialyse: Helsedirektoratet;  
11 2018 [updated 2021 02.12; cited 2021 12.12]. Available from:  
12 [https://www.helsedirektoratet.no/statistikk/kvalitetsindikatorer/behandling-av-](https://www.helsedirektoratet.no/statistikk/kvalitetsindikatorer/behandling-av-sykdom-og-overlevelse/andel-dialysepasienter-som-har-hjemmedialyse)  
13 [sykdom-og-overlevelse/andel-dialysepasienter-som-har-hjemmedialyse](https://www.helsedirektoratet.no/statistikk/kvalitetsindikatorer/behandling-av-sykdom-og-overlevelse/andel-dialysepasienter-som-har-hjemmedialyse)
- 14 8. Helsedirektoratet. Handlingsplan for forebygging og behandling av kronisk nyresykdom  
15 (2011-2015) 2011 [cited 2021 11.09]. Available from:  
16 [http://www.nephro.no/foreningsnytt/Handlingsplan\\_forebygging\\_behandling\\_kronisk](http://www.nephro.no/foreningsnytt/Handlingsplan_forebygging_behandling_kronisk_nyresykdom.pdf)  
17 [\\_nyresykdom.pdf](http://www.nephro.no/foreningsnytt/Handlingsplan_forebygging_behandling_kronisk_nyresykdom.pdf).
- 18 9. Urquhart-Secord R, Craig JC, Hemmelgarn B, et al. Patient and Caregiver Priorities for  
19 Outcomes in Hemodialysis: An International Nominal Group Technique Study.  
20 *American Journal of Kidney Diseases* 2016;68(3):444-54. doi:  
21 <https://doi.org/10.1053/j.ajkd.2016.02.037>
- 22 10. Moist LM, Bragg-Gresham JL, Pisoni RL, et al. Travel Time to Dialysis as a Predictor of  
23 Health-Related Quality of Life, Adherence, and Mortality: The Dialysis Outcomes and  
24 Practice Patterns Study (DOPPS). *American Journal of Kidney Diseases*  
25 2008;51(4):641-50. doi: <https://doi.org/10.1053/j.ajkd.2007.12.021>
- 26 11. Braut GS. Telemedisin Store medisinske leksikon [updated 2020 15.06; cited 2021 10.10].  
27 Available from: <https://sml.sn.no/telemedisin>.
- 28 12. DelVecchio A. Definition, remote patient monitoring (RPM): Tech target, Search health  
29 IT; [updated April 2019; cited 2021 10.10]. Available from:  
30 <https://searchhealthit.techtarget.com/definition/remote-patient-monitoring-RPM>
- 31 13. Rajkomar A, Farrington K, Mayer A, et al. Patients' and carers' experiences of interacting  
32 with home haemodialysis technology: implications for quality and safety. *BMC*  
33 *Nephrology* 2014;15(1):195-95. doi: 10.1186/1471-2369-15-195
- 34 14. Rygh E, Arild E, Johnsen E, et al. Choosing to live with home dialysis-patients'  
35 experiences and potential for telemedicine support: a qualitative study. *BMC*  
36 *Nephrology* 2012;13(1):13-13. doi: 10.1186/1471-2369-13-13
- 37 15. Viglino G, Neri L, Barbieri S, et al. Videodialysis: a pilot experience of telecare for  
38 assisted peritoneal dialysis. *J Nephrol* 2020;33(1):177-82. doi: 10.1007/s40620-019-  
39 00647-6 [published Online First: 2019/09/19]
- 40 16. François K, Bargman JM. Evaluating the benefits of home-based peritoneal dialysis. *Int J*  
41 *Nephrol Renovasc Dis* 2014;7:447-55. doi: 10.2147/IJNRD.S50527
- 42 17. Marshall MR, Polkinghorne KR, Kerr PG, et al. Temporal Changes in Mortality Risk by  
43 Dialysis Modality in the Australian and New Zealand Dialysis Population. *American*  
44 *Journal of Kidney Diseases* 2015;66(3):489-98. doi:  
45 <https://doi.org/10.1053/j.ajkd.2015.03.014>
- 46 18. Walker RC, Howard K, Morton RL. Home hemodialysis: a comprehensive review of  
47 patient-centered and economic considerations. *Clinicoecon Outcomes Res* 2017;9:149-  
48 61. doi: 10.2147/CEOR.S69340
- 49 19. Higgins JPT TJ, Chandler J, Cumpston M, Li T, Page MJ, Welch VA (editors). *Cochrane*  
50 *Handbook for Systematic Reviews of Interventions* version 6.2 (updated February

- 2021); Cochrane; 2021 [cited 2021 12.09]. Available from:  
[www.training.cochrane.org/handbook](http://www.training.cochrane.org/handbook).
20. PRISMA transparent reporting of systematic reviews and meta-analyses [cited 2021 08.11]. Available from: <http://www.prisma-statement.org/>.
21. Straus SE, Glasziou P, Richardson WS, et al. Evidence-based medicine E-book: How to practice and teach EBM: Elsevier Health Sciences 2018.
22. Tonelli M, Wiebe N, Guthrie B, et al. Comorbidity as a driver of adverse outcomes in people with chronic kidney disease. *Kidney International* 2015;88(4):859-66. doi: <https://doi.org/10.1038/ki.2015.228>
23. Wells GA, Shea B, O'Connell D, et al. The Newcastle-Ottawa Scale (NOS) for assessing the quality of nonrandomised studies in meta-analyses: The Ottawa hospital research institute; [cited 2021 21.10]. Available from:  
[http://www.ohri.ca/programs/clinical\\_epidemiology/oxford.asp](http://www.ohri.ca/programs/clinical_epidemiology/oxford.asp)
24. Cochrane RevMan Cochrane Training [updated Latest version of RevMan 5.4.1. from September 2020; cited 2021 10.10]. Available from:  
<https://training.cochrane.org/online-learning/core-software-cochrane-reviews/revman>.
25. GRADE: The GRADE Working Group; 2004-2021 [cited 2021 21.10]. Available from:  
<https://www.gradeworkinggroup.org/>
26. Campbell M, McKenzie JE, Sowden A, et al. Synthesis without meta-analysis (SWiM) in systematic reviews: reporting guideline. *BMJ* 2020;368:l6890. doi: [10.1136/bmj.l6890](https://doi.org/10.1136/bmj.l6890)
27. Cao F, Li L, Lin M, et al. Application of instant messaging software in the follow-up of patients using peritoneal dialysis, a randomised controlled trial. *Journal of Clinical Nursing* 2018;27(15-16):3001-07. doi: <https://doi.org/10.1111/jocn.14487>
28. Chaudhuri S, Han H, Muchiutti C, et al. Remote Treatment Monitoring on Hospitalization and Technique Failure Rates in Peritoneal Dialysis Patients. *Kidney360* 2020;1(3):191-202. doi: [10.34067/kid.0000302019](https://doi.org/10.34067/kid.0000302019)
29. Corzo L, Wilkie M, Vesga JI, et al. Technique failure in remote patient monitoring program in patients undergoing automated peritoneal dialysis: A retrospective cohort study. *Perit Dial Int* 2020;896860820982223. doi: [10.1177/0896860820982223](https://doi.org/10.1177/0896860820982223) [published Online First: 2021/01/01]
30. Jung HY, Jeon Y, Kim YS, et al. Outcomes of Remote Patient Monitoring for Automated Peritoneal Dialysis: A Randomized Controlled Trial. *Nephron* 2021 doi: [10.1159/000518364](https://doi.org/10.1159/000518364)
31. Milan Manani S, Baretta M, Giuliani A, et al. Remote monitoring in peritoneal dialysis: benefits on clinical outcomes and on quality of life. *Journal of Nephrology* 2020;33(6):1301-08.
32. Sanabria M, Buitrago G, Lindholm B, et al. Remote Patient Monitoring Program in Automated Peritoneal Dialysis: Impact on Hospitalizations. *Perit Dial Int* 2019;39(5):472-78. doi: [10.3747/pdi.2018.00287](https://doi.org/10.3747/pdi.2018.00287) [published Online First: 2019/07/25]
33. Weinhandl ED, Collins AJ. Relative risk of home hemodialysis attrition in patients using a telehealth platform. *Hemodial Int* 2018;22(3):318-27. doi: [10.1111/hdi.12621](https://doi.org/10.1111/hdi.12621) [published Online First: 2017/12/07]
34. Wong FK, Chow SK, Chan TM. Evaluation of a nurse-led disease management programme for chronic kidney disease: a randomized controlled trial. *International Journal of Nursing Studies* 2010;47(3):268-78. doi: [10.1016/j.ijnurstu.2009.07.001](https://doi.org/10.1016/j.ijnurstu.2009.07.001)
35. Kidney Disease Quality of Life Instrument (KDQOL): The RAND Corporation; [cited 2021 14.10]. Available from: [https://www.rand.org/health-care/surveys\\_tools/kdqol.html](https://www.rand.org/health-care/surveys_tools/kdqol.html)

- 1  
2  
3 1 36. Magnus M, Sikka N, Cherian T, et al. Satisfaction and Improvements in Peritoneal  
4 2 Dialysis Outcomes Associated with Telehealth. *Appl Clin Inform* 2017;8(1):214-25.  
5 3 doi: 10.4338/aci-2016-09-ra-0154 [published Online First: 2017/03/02]  
6 4  
7 4 37. Manera KE, Johnson DW, Craig JC, et al. Patient and Caregiver Priorities for Outcomes  
8 5 in Peritoneal Dialysis. *Multinational Nominal Group Technique Study* 2019;14(1):74-  
9 6 83. doi: 10.2215/cjn.05380518  
10 7  
11 8 38. Evangelidis N, Tong A, Manns B, et al. Developing a Set of Core Outcomes for Trials in  
12 9 Hemodialysis: An International Delphi Survey. *American Journal of Kidney Diseases*  
13 10 2017;70(4):464-75. doi: 10.1053/j.ajkd.2016.11.029  
14 11  
15 11 39. Cartwright EJ, Z ZSG, Foo M, et al. eHealth interventions to support patients in delivering  
16 12 and managing peritoneal dialysis at home: A systematic review. *Peritoneal Dialysis*  
17 13 *International* 2021;41(1):32-41.  
18 14  
19 15 40. Stevenson JK, Campbell ZC, Webster AC, et al. eHealth interventions for people with  
20 16 chronic kidney disease. *Cochrane Database of Systematic Reviews* 2019(8) doi:  
21 17 10.1002/14651858.CD012379.pub2  
22 18  
23 18 41. Ariza JG, Walton SM, Sanabria M, et al. Evaluating a remote patient monitoring program  
24 19 for automated peritoneal dialysis. *Perit Dial Int* 2020;40(4):377-83. doi:  
25 20 10.1177/0896860819896880 [published Online First: 2020/02/18]  
26 21  
27 22 42. Sanyal C, Stolee P, Juzwishin D, et al. Economic evaluations of eHealth technologies: A  
28 23 systematic review. *PLoS One* 2018;13(6):e0198112. doi:  
29 24 10.1371/journal.pone.0198112 [published Online First: 2018/06/14]  
30 25  
31 25 43. Gallar P, Vigil A, Rodriguez I, et al. Two-year experience with telemedicine in the  
32 26 follow-up of patients in home peritoneal dialysis. *Journal of Telemedicine & Telecare*  
33 27 2007;13(6):288-92. doi: 10.1258/135763307781644906  
34  
35 28 44. SONG. Standardised outcomes in nephrology [cited 2022 23.04]. Available from:  
36 29 <https://songinitiative.org/>  
37  
38  
39  
40  
41  
42  
43  
44  
45  
46  
47  
48  
49  
50  
51  
52  
53  
54  
55  
56  
57  
58  
59  
60

28 **Figure legend:**

29 **Figure 1:** Prisma flow diagram for selection of studies

30 **Figure 2:** Metaanalyses of outcomes disease specific hospitalisations and technical failure





## (a) Disease specific hospitalisations

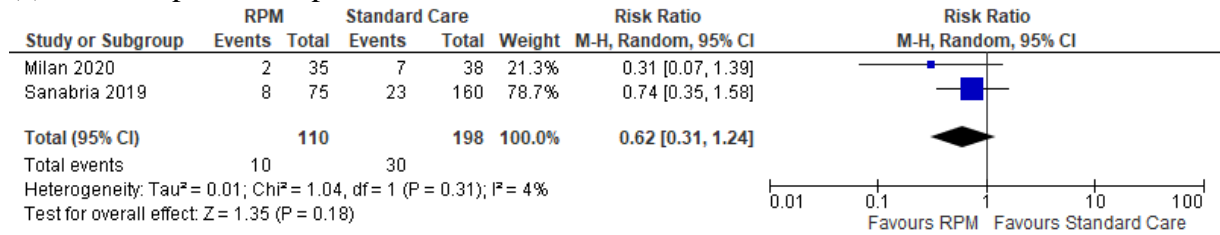

## (b) Technical failure

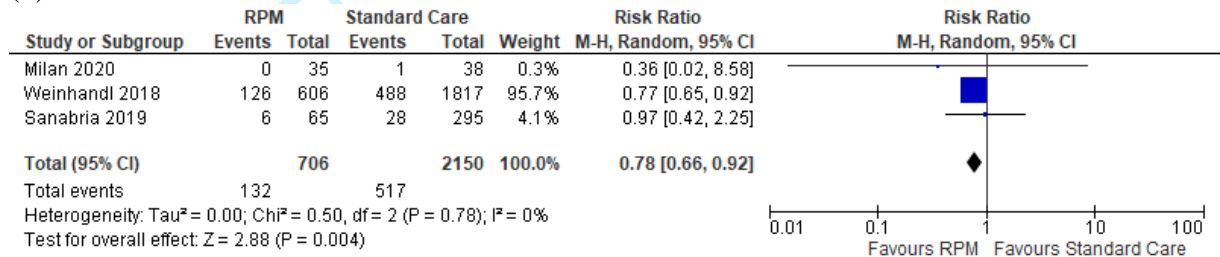

**Supplemental Appendix 1: Search strategies**

Date: 23.08.2021

Searches conducted by: Lien Nguyen

Search strategies peer reviewed by: Elisabet Hafstad

| Database                                                         | Number of hits |
|------------------------------------------------------------------|----------------|
| Embase <1974 to 2021 August 20> (OVID)                           | 266            |
| Ovid MEDLINE(R) ALL <1946 to August 20, 2021>                    | 231            |
| Cochrane Library of Systematic Reviews (Cochrane Library; Wiley) | 0              |
| CENTRAL(Cochrane Library; Wiley)                                 | 34             |
| CINAHL (EBSCO)                                                   | 43             |
| Total number of references                                       | 574            |
| Total after duplicate removal                                    | 451            |

**Database: Embase****Search interface: Advanced Search**

- 1 exp telehealth/ 60896
- 2 exp telecommunication/ 87729
- 3 exp health care delivery/ 3564027
- 4 2 and 3 65304
- 5 (telecare\* or teleconsult\* or telefollow\* or telehealth\* or telehome\* or telemanag\* or telemedicine or telemonitor\* or telenurs\* or telepatient\* or telesupport\*).ti,ab,kw,bt. 33953
- 6 ((tele or telemedical\* or tele medical\*) adj (care\* or checkup\* or check up\* or consult\* or followup\* or follow up\* or health\* or home\* or manag\* or medicine\* or monitor\* or nurs\* or patient\* or support\*)).ti,ab,kw,bt. 1853
- 7 (ecare or econsult\* or ehealth or emedicine\* or enurs\* or mcare or mconsult\* or mhealth or mnurse or mcare or mnursing or mconsult\* or mnurs\*).ti,ab,kw,bt. 10706
- 8 ((e or m or mobile or digital) adj (care or consult\* or health\* or nurs\*)).ti,ab,kw,bt. 15428
- 9 (remote adj2 (care\* or checkup\* or check up\* or consult\* or followup\* or follow up\* or health\* or home\* or manag\* or medicine\* or monitor\* or nursing or patient\* or self)).ti,ab,kw,bt. 12293
- 10 1 or 4 or 5 or 6 or 7 or 8 or 9 92070
- 11 hemodialysis/ 115843
- 12 exp peritoneal dialysis/ 44307
- 13 home dialysis/ 2966
- 14 (((dialysis or hemodialysis or haemodialysis) adj4 home?) or peritoneal dialysis).ti,ab,kw,bt. 37655

1  
2  
3 15 (CAPD or APD or HHD).ti. 3524  
4  
5 16 or/11-15 151629  
6  
7 17 10 and 16 534  
8  
9 18 limit 17 to yr=2000-current 516  
10  
11 19 (exp animals/ or exp invertebrate/ or animal experiment/ or animal model/ or animal tissue/  
12 or animal cell/ or nonhuman/) not (human/ or normal human/ or human cell/) 6724645  
13  
14 20 editorial.pt. 699530  
15  
16 21 18 not (19 or 20) 494  
17  
18 22 limit 21 to embase 270  
19  
20 23 remove duplicates from 22 266  
21  
22

23 **Database: OVID MEDLINE**

24 **Search interface: Advanced Search**

25  
26  
27  
28  
29 1 Telemedicine/ 29751  
30  
31 2 Telenursing/ 232  
32  
33 3 Remote Consultation/ 5273  
34  
35 4 or/1-3 34165  
36  
37 5 exp Telecommunications/ 108428  
38  
39 6 (care or healthcare).hw. 1324775  
40  
41 7 5 and 6 19771  
42  
43 8 4 or 7 42042  
44  
45 9 (telecare\* or teleconsult\* or telefollow\* or telehealth\* or telehome\* or telemanag\* or  
46 telemedicine or telemonitor\* or telenurs\* or telepatient\* or telesupport\*).ti,ab,kf,bt. 26067  
47  
48 10 ((tele or telemedical\* or tele medical\*) adj (care\* or checkup\* or check up\* or consult\* or  
49 followup\* or follow up\* or health\* or home\* or manag\* or medicine\* or monitor\* or nurs\*  
50 or patient\* or support\*)).ti,ab,kf,bt. 1020  
51  
52 11 (ecare or econsult\* or ehealth or emedicine\* or enurs\* or mcare or mconsult\* or mhealth or  
53 mnurse or mcare or mnursing or mconsult\* or mnurs\*).ti,ab,kf,bt. 10618  
54  
55 12 ((e or m or mobile or digital) adj (care or consult\* or health\* or nurs\*)).ti,ab,kf,bt. 13372  
56  
57 13 (remote adj2 (care\* or checkup\* or check up\* or consult\* or followup\* or follow up\* or  
58 health\* or home\* or manag\* or medicine\* or monitor\* or nursing or patient\* or  
59 self)).ti,ab,kf,bt. 8231  
60  
61 14 or/8-13 69186

1  
2  
3 15 Renal Dialysis/ 94819  
4  
5 16 Hemodialysis, Home/ 2013  
6  
7 17 exp Peritoneal Dialysis/ 26840  
8  
9 18 (((dialysis or hemodialysis or haemodialysis) adj4 home?) or peritoneal dialysis).ti,ab,kf,bt.  
10 28202  
11  
12 19 (CAPD or APD or HHD).ti. 2685  
13  
14 20 or/15-19 121750  
15  
16 21 14 and 20 271  
17  
18 22 limit 21 to yr=2000-current 243  
19  
20 23 exp animals/ not humans/ 4877030  
21  
22 24 (news or editorial or comment).pt. 1512750  
23  
24 25 22 not (23 or 24) 231  
25  
26 26 remove duplicates from 25 231

27  
28  
29 **Database: Cochrane Database of Systematic Review & CENTRAL**

30 **Search interface: Advanced Search > Search Manager**

31  
32  
33  
34 ID Search Hits  
35  
36 #1 [mh ^telemedicine] 2414  
37  
38 #2 [mh ^telenursing] 31  
39  
40 #3 [mh ^"remote consultation"] 381  
41  
42 #4 #1 or #2 or #3 2777  
43  
44 #5 [mh telecommunications] 7362  
45  
46 #6 [mh ^"delivery of health care"] 806  
47  
48 #7 [mh ^"health services"] 458  
49  
50 #8 #5 and (#6 or #7) 139  
51  
52 #9 #4 or #8 2838  
53  
54 #10 (telecare\* or teleconsult\* or telefollow\* or telehealth\* or telehome\* or telemanag\* or  
55 telemedicine or telemonitor\* or telenurs\* or telepatient\* or telesupport\*):ti,ab,kw 7370  
56  
57 #11 ((tele or telemedical\* or tele-medical\*) NEXT (care\* or checkup\* or check-up\* or consult\* or  
58 followup\* or follow-up\* or health\* or home\* or manag\* or medicine\* or monitor\* or nurs\*  
59 or patient\* or support\*)):ti,ab,kw 446  
60

- 1  
2  
3 #12 (ecare or econsult\* or ehealth or emedicine\* or enurs\* or mcare or mconsult\* or mhealth or  
4 mnurse or mcare or mnursing or mconsult\* or mnurs\*):ti,ab,kw 2547  
5  
6 #13 ((e or m or mobile or digital) NEXT (care or consult\* or health\* or nurs\*)):ti,ab,kw 3725  
7  
8 #14 (remote NEAR/2 (care\* or checkup\* or check-up\* or consult\* or followup\* or follow-up\* or  
9 health\* or home\* or manag\* or medicine\* or monitor\* or nursing or patient\* or  
10 self)):ti,ab,kw 1743  
11  
12 #15 {or #9-#14} 11340  
13  
14 #16 [mh ^"Renal Dialysis"] 4322  
15  
16 #17 [mh ^"hemodialysis, home"] 43  
17  
18 #18 [mh "Peritoneal Dialysis"] 900  
19  
20 #19 (((dialysis or hemodialysis or haemodialysis) NEAR/4 home?) or "peritoneal dialysis"):ti,ab,kw  
21 2491  
22  
23 #20 (CAPD or APD or HHD):ti 409  
24  
25 #21 {or #16-#20} 6775  
26  
27 #22 #15 and #21 with Cochrane Library publication date Between Jan 2000 and Aug 2021, in  
28 Cochrane Reviews 0  
29  
30 #23 #15 and #21 with Publication Year from 2000 to 2021, in Trials 34  
31  
32  
33  
34  
35  
36  
37  
38  
39  
40  
41  
42  
43  
44  
45  
46  
47  
48  
49  
50  
51  
52  
53  
54  
55  
56  
57  
58  
59  
60

**Database: CINAHL**

**Search interface: Advanced Search**

## Supplemental Appendix 2: Excluded studies read in full text

| Excluded studies read in full text (n=17)                                                                                                                                                                                                                                                                                                                                                                                                                          | Justifications for exclusion                                       |
|--------------------------------------------------------------------------------------------------------------------------------------------------------------------------------------------------------------------------------------------------------------------------------------------------------------------------------------------------------------------------------------------------------------------------------------------------------------------|--------------------------------------------------------------------|
| Dey V, Jones A, Spalding EM. Telehealth: Acceptability, clinical interventions and quality of life in peritoneal dialysis. SAGE Open Med. 2016;4:2050312116670188.                                                                                                                                                                                                                                                                                                 | No control group                                                   |
| El Shamy O, Tran H, Sharma S, Ronco C, Narayanan M, Uribarri J, et al. Telenephrology with Remote Peritoneal Dialysis Monitoring during Coronavirus Disease 19. Karger AG; 2020. p. 480-2.                                                                                                                                                                                                                                                                         | Letter about Covid-19 and the impact in kidney care/review         |
| Harnett P, Jones M, Almond M, Ballasubramaniam G, Kunnath V. A virtual clinic to improve long-term outcomes in chronic kidney disease. Clinical Medicine, Journal of the Royal College of Physicians of London. 2018;18(5):356-63.                                                                                                                                                                                                                                 | Not home dialysis patients                                         |
| Huang R, Liu N, Nicdao MA, Mikaheal M, Baldacchino T, Albeos A, et al. Emotion sharing in remote patient monitoring of patients with chronic kidney disease. J Am Med Inform Assoc. 2020;27(2):185-93.                                                                                                                                                                                                                                                             | No control group and wrong outcome                                 |
| Kiberd J, Khan U, Stockman C, Radhakrishnan A, Phillips M, Kiberd BA, et al. Effectiveness of a Web-Based eHealth Portal for Delivery of Care to Home Dialysis Patients: A Single-Arm Pilot Study. Can J Kidney Health Dis. 2018;5:2054358118794415.                                                                                                                                                                                                               | No control group                                                   |
| Milan Manani S, Crepaldi C, Giuliani A, Virzi GM, Garzotto F, Riello C, et al. Remote Monitoring of Automated Peritoneal Dialysis Improves Personalization of Dialytic Prescription and Patient's Independence. Blood Purification. 2018;46(2):111-7.                                                                                                                                                                                                              | No control group                                                   |
| Milan Manani S, Rosner MH, Virzi GM, Giuliani A, Berti S, Crepaldi C, et al. Longitudinal Experience with Remote Monitoring for Automated Peritoneal Dialysis Patients. Nephron. 2019;142(1):1-9.                                                                                                                                                                                                                                                                  | No control group                                                   |
| Musso CG, Plazzotta F, Otero C, Aguilera J, Campos F, Diez GR, et al. Informatic nephrology: 17 years of one-center experience. International Urology and Nephrology. 2015;47(9):1587-8.                                                                                                                                                                                                                                                                           | Letter (not empirical study)                                       |
| Nayak KS, Ronco C, Karopadi AN, Rosner MH. Telemedicine and Remote Monitoring: Supporting the Patient on Peritoneal Dialysis. Perit Dial Int. 2016;36(4):362-6.                                                                                                                                                                                                                                                                                                    | No control group: summary from three different studies             |
| Patterson P. Telehealth for Home Dialysis Therapies. Nephrol Nurs J. 2017;44(6):545-8.                                                                                                                                                                                                                                                                                                                                                                             | An interview with a doctor                                         |
| Polanco E, Aquey M, Collado J, Campos E, Guzman J, Cuevas-Budhart MA, et al. A COVID-19 pandemic-specific, structured care process for Peritoneal Dialysis patients facilitated by Telemedicine: therapy continuity, prevention and complications management. Therapeutic apheresis and dialysis : official peer-reviewed journal of the International Society for Apheresis, the Japanese Society for Apheresis, the Japanese Society for Dialysis Therapy. 2021. | No control group                                                   |
| Ronco C, Manani SM, Giuliani A, Tantillo I, Reis T, Brown EA. Remote patient management of peritoneal dialysis during COVID-19 pandemic. Perit Dial Int. 2020;40(4):363-7.                                                                                                                                                                                                                                                                                         | Review                                                             |
| Scarpioni R, Manini A, Chiappini P. Remote patient monitoring in peritoneal dialysis helps reduce risk of hospitalization during Covid-19 pandemic. J Nephrol. 2020;33(6):1123-4.                                                                                                                                                                                                                                                                                  | There are patients with RPM and without, but they are not compared |
| Tangaro S, Fanizzi A, Amoroso N, Corciulo R, Garuccio E, Gesualdo L, et al. Computer aided detection system for prediction of the malaise during hemodialysis. Computational and Mathematical Methods in Medicine. 2016;2016 (no pagination).                                                                                                                                                                                                                      | No control group without TM                                        |
| Viglino G, Neri L, Barbieri S, Tortone C. Videodialysis: a pilot experience of telecare for assisted peritoneal dialysis. J Nephrol. 2020;33(1):177-82.                                                                                                                                                                                                                                                                                                            | No relevant outcomes                                               |
| Wood E, McCarthy K, Roper M. Remote monitoring of peritoneal dialysis: evaluating the impact of the Claria Sharesource system. Journal of Kidney Care. 2019;4(1):16-24.                                                                                                                                                                                                                                                                                            | No control group                                                   |

1  
2  
3  
4  
5  
6  
7  
8  
9  
10  
11  
12  
13  
14  
15  
16  
17  
18  
19  
20  
21  
22  
23  
24  
25  
26  
27  
28  
29  
30  
31  
32  
33  
34  
35  
36  
37  
38  
39  
40  
41  
42  
43  
44  
45  
46  
47  
48  
49  
50  
51  
52  
53  
54  
55  
56  
57  
58  
59  
60

|                                                                                                                                                                                                       |                                |
|-------------------------------------------------------------------------------------------------------------------------------------------------------------------------------------------------------|--------------------------------|
| Yeter HH, Karacalik C, Eraslan E, Akcay OF, Derici U, Ronco C. Effect of remote patient management in peritoneal dialysis on haemodynamic and volume control. <i>Nephrology</i> . 2020;25(11):856-64. | No pre-intervention assessment |
|-------------------------------------------------------------------------------------------------------------------------------------------------------------------------------------------------------|--------------------------------|

For peer review only

**Supplemental Appendix 3:** Description of the studies' risk of bias, variables adjusted for in the analyses and sources of funding

**Risk of bias for the RCTs**

|           | Random sequence generation (selection bias) | Allocation concealment (selection bias) | Blinding of participants and personnel (performance bias) | Blinding of outcome assessment (detection bias) | Incomplete outcome data (attrition bias) | Selective reporting (reporting bias) | Other bias |
|-----------|---------------------------------------------|-----------------------------------------|-----------------------------------------------------------|-------------------------------------------------|------------------------------------------|--------------------------------------|------------|
| Cao 2018  | +                                           | ?                                       | ?                                                         | ?                                               | +                                        | ?                                    | +          |
| Jung 2021 | +                                           | ?                                       | -                                                         | -                                               | +                                        | +                                    | +          |

**Risk of bias for the retrospective cohort studies**

| Study                 | Selection |     |     |    | Comparability | Outcome |     |     | Stars: Quality |
|-----------------------|-----------|-----|-----|----|---------------|---------|-----|-----|----------------|
|                       | 1         | 2   | 3   | 4  |               | 1       | 2   | 3   |                |
| <b>Chaudhuri 2020</b> | 1b*       | 2a* | 3a* | 4b | 1ab**         | 1b*     | 2a* | 3d  | 7: Good        |
| <b>Corzo 2020</b>     | 1b*       | 2a* | 3a* | 4b | 1ab**         | 1b*     | 2a* | 3b* | 9: Good        |
| <b>Milan 2020</b>     | 1c        | 2a* | 3a* | 4b | 1-            | 1b*     | 2a* | 3b* | 6: Fair        |
| <b>Sanabrina 2019</b> | 1b*       | 2a* | 3a* | 4b | 1ab           | 1b*     | 2a* | 3b* | 9: Good        |
| <b>Weinhandl 2018</b> | 1b*       | 2a* | 3a* | 4b | 1ab**         | 1b*     | 2a* | 3d  | 7: Good        |



### Variables adjusted for in the analyses

|                       | <b>Hospitalisations</b>                                                                                                                                                  | <b>Technical failure</b>                                                                                             | <b>QoL</b>                                  |
|-----------------------|--------------------------------------------------------------------------------------------------------------------------------------------------------------------------|----------------------------------------------------------------------------------------------------------------------|---------------------------------------------|
| <b>Chaudhuri 2020</b> | User group, Age, Gender, Race/ethnicity, Comorbidity, Laboratory measures, Education, Alcohol dependency, Urbanicity                                                     | User group, Age, Gender, Race/ethnicity, Comorbidity, Laboratory measures, Education, Alcohol dependency, Urbanicity |                                             |
| <b>Corzo 2020</b>     |                                                                                                                                                                          | Death, Kidney transplant                                                                                             |                                             |
| <b>Jung 2021</b>      |                                                                                                                                                                          |                                                                                                                      | Age, Diabetes, Serum albumin concentrations |
| <b>Sanabria 2019</b>  | Age, Gender, Education, CKD cause, Comorbidity index, Hemoglobin, Albumin, Phosphorus, Diuresis, Peritoneal equilibration test %, City, Follow-up time, Cause of censure |                                                                                                                      |                                             |
| <b>Weinhandl 2018</b> |                                                                                                                                                                          | Age, Sex, Race, Vascular access modality                                                                             |                                             |

### Sources of funding

**Cao 2018:** *“This project is supported by the 2014 Appropriate Technology Promotion Funding Plan for primary organizations and cities by the Fujian Provincial Health and Family Planning Commission and key Clinical Specialty Discipline Construction Program of Fujian, P.R.C.”*

**Jung 2021:** *“This research was supported by a grant from the Korea Health Technology R&D Project through the Korea Health Industry Development Institute, funded by the Ministry of Health & Welfare, Republic of Korea (HC15C1129). The sponsor of this study had no role in the study design collection, data management, data analysis, interpretation of data, writing of the report, and the decision to submit the report for publication”*

**Chaudhuri 2020:** *“Analysis was supported by Fresenius Medical Care”*

**Corzo 2020:** *“This work was funded by Renal Therapy Services, Colombia”*

**Milan 2020:** *“The authors did not use funding sources”*

**Sanabria 2019:** *“The study was supported by Baxter Renal Care Services Colombia, an independent entity owned by Baxter International, Inc. Funding to support the preparation of this manuscript was provided by Baxter Healthcare Corporation, Deerfield, Illinois. Baxter Healthcare Corporation participated in reviewing the manuscript for scientific accuracy”*

1  
2  
3 **Weinhandl 2018:** *“Conflict of Interest: Dr Weinhandl and Dr Collins are both employees of*  
4 *NxStage Medical. Disclosure of grants or other funding: The authors are solely responsible*  
5 *for the design of the study and the content of the manuscript. The content of the manuscript*  
6 *was reviewed by other NxStage Medical employees only for the verification of compliance*  
7 *with product labeling.”*  
8  
9  
10  
11  
12  
13  
14  
15  
16  
17  
18  
19  
20  
21  
22  
23  
24  
25  
26  
27  
28  
29  
30  
31  
32  
33  
34  
35  
36  
37  
38  
39  
40  
41  
42  
43  
44  
45  
46  
47  
48  
49  
50  
51  
52  
53  
54  
55  
56  
57  
58  
59  
60

For peer review only

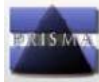

## PRISMA 2020 Checklist

| Section and Topic             | Item # | Checklist item                                                                                                                                                                                                                                                                                       | Location where item is reported |
|-------------------------------|--------|------------------------------------------------------------------------------------------------------------------------------------------------------------------------------------------------------------------------------------------------------------------------------------------------------|---------------------------------|
| <b>TITLE</b>                  |        |                                                                                                                                                                                                                                                                                                      |                                 |
| Title                         | 1      | Identify the report as a systematic review.                                                                                                                                                                                                                                                          | p. 1                            |
| <b>ABSTRACT</b>               |        |                                                                                                                                                                                                                                                                                                      |                                 |
| Abstract                      | 2      | See the PRISMA 2020 for Abstracts checklist.                                                                                                                                                                                                                                                         | p. 2                            |
| <b>INTRODUCTION</b>           |        |                                                                                                                                                                                                                                                                                                      |                                 |
| Rationale                     | 3      | Describe the rationale for the review in the context of existing knowledge.                                                                                                                                                                                                                          | p. 3-4                          |
| Objectives                    | 4      | Provide an explicit statement of the objective(s) or question(s) the review addresses.                                                                                                                                                                                                               | p. 4                            |
| <b>METHODS</b>                |        |                                                                                                                                                                                                                                                                                                      |                                 |
| Eligibility criteria          | 5      | Specify the inclusion and exclusion criteria for the review and how studies were grouped for the syntheses.                                                                                                                                                                                          | p. 4-6                          |
| Information sources           | 6      | Specify all databases, registers, websites, organisations, reference lists and other sources searched or consulted to identify studies. Specify the date when each source was last searched or consulted.                                                                                            | p. 4 & supplement file 1        |
| Search strategy               | 7      | Present the full search strategies for all databases, registers and websites, including any filters and limits used.                                                                                                                                                                                 | Supplement file 1               |
| Selection process             | 8      | Specify the methods used to decide whether a study met the inclusion criteria of the review, including how many reviewers screened each record and each report retrieved, whether they worked independently, and if applicable, details of automation tools used in the process.                     | p. 5                            |
| Data collection process       | 9      | Specify the methods used to collect data from reports, including how many reviewers collected data from each report, whether they worked independently, any processes for obtaining or confirming data from study investigators, and if applicable, details of automation tools used in the process. | p. 6                            |
| Data items                    | 10a    | List and define all outcomes for which data were sought. Specify whether all results that were compatible with each outcome domain in each study were sought (e.g. for all measures, time points, analyses), and if not, the methods used to decide which results to collect.                        | p. 5-6                          |
|                               | 10b    | List and define all other variables for which data were sought (e.g. participant and intervention characteristics, funding sources). Describe any assumptions made about any missing or unclear information.                                                                                         | p. 6                            |
| Study risk of bias assessment | 11     | Specify the methods used to assess risk of bias in the included studies, including details of the tool(s) used, how many reviewers assessed each study and whether they worked independently, and if applicable, details of automation tools used in the process.                                    | p. 5-6                          |
| Effect measures               | 12     | Specify for each outcome the effect measure(s) (e.g. risk ratio, mean difference) used in the synthesis or presentation of results.                                                                                                                                                                  | p. 6                            |
| Synthesis methods             | 13a    | Describe the processes used to decide which studies were eligible for each synthesis (e.g. tabulating the study intervention characteristics and comparing against the planned groups for each synthesis (item #5)).                                                                                 | p. 6                            |
|                               | 13b    | Describe any methods required to prepare the data for presentation or synthesis, such as handling of missing summary statistics, or data conversions.                                                                                                                                                | NA                              |
|                               | 13c    | Describe any methods used to tabulate or visually display results of individual studies and syntheses.                                                                                                                                                                                               | p. 6                            |
|                               | 13d    | Describe any methods used to synthesize results and provide a rationale for the choice(s). If meta-analysis was performed, describe the model(s), method(s) to identify the presence and extent of statistical heterogeneity, and software package(s) used.                                          | p. 6                            |
|                               | 13e    | Describe any methods used to explore possible causes of heterogeneity among study results (e.g. subgroup analysis, meta-regression).                                                                                                                                                                 | NA                              |
|                               | 13f    | Describe any sensitivity analyses conducted to assess robustness of the synthesized results.                                                                                                                                                                                                         | NA                              |
| Reporting bias assessment     | 14     | Describe any methods used to assess risk of bias due to missing results in a synthesis (arising from reporting biases).                                                                                                                                                                              | NA                              |

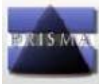

## PRISMA 2020 Checklist

| Section and Topic                              | Item # | Checklist item                                                                                                                                                                                                                                                                       | Location where item is reported |
|------------------------------------------------|--------|--------------------------------------------------------------------------------------------------------------------------------------------------------------------------------------------------------------------------------------------------------------------------------------|---------------------------------|
| Certainty assessment                           | 15     | Describe any methods used to assess certainty (or confidence) in the body of evidence for an outcome.                                                                                                                                                                                | p. 6                            |
| <b>RESULTS</b>                                 |        |                                                                                                                                                                                                                                                                                      |                                 |
| Study selection                                | 16a    | Describe the results of the search and selection process, from the number of records identified in the search to the number of studies included in the review, ideally using a flow diagram.                                                                                         | Figure 1 & p. 7                 |
|                                                | 16b    | Cite studies that might appear to meet the inclusion criteria, but which were excluded, and explain why they were excluded.                                                                                                                                                          | p. 7                            |
| Study characteristics                          | 17     | Cite each included study and present its characteristics.                                                                                                                                                                                                                            | Table 1 & p. 7                  |
| Risk of bias in studies                        | 18     | Present assessments of risk of bias for each included study.                                                                                                                                                                                                                         | Supplement file 2               |
| Results of individual studies                  | 19     | For all outcomes, present, for each study: (a) summary statistics for each group (where appropriate) and (b) an effect estimate and its precision (e.g. confidence/credible interval), ideally using structured tables or plots.                                                     | Figure 2 & table 2              |
| Results of syntheses                           | 20a    | For each synthesis, briefly summarise the characteristics and risk of bias among contributing studies.                                                                                                                                                                               | p. 9                            |
|                                                | 20b    | Present results of all statistical syntheses conducted. If meta-analysis was done, present for each the summary estimate and its precision (e.g. confidence/credible interval) and measures of statistical heterogeneity. If comparing groups, describe the direction of the effect. | p. 9 & Figure 2                 |
|                                                | 20c    | Present results of all investigations of possible causes of heterogeneity among study results.                                                                                                                                                                                       | NA                              |
|                                                | 20d    | Present results of all sensitivity analyses conducted to assess the robustness of the synthesized results.                                                                                                                                                                           | NA                              |
| Reporting biases                               | 21     | Present assessments of risk of bias due to missing results (arising from reporting biases) for each synthesis assessed.                                                                                                                                                              | NA                              |
| Certainty of evidence                          | 22     | Present assessments of certainty (or confidence) in the body of evidence for each outcome assessed.                                                                                                                                                                                  | Table 3                         |
| <b>DISCUSSION</b>                              |        |                                                                                                                                                                                                                                                                                      |                                 |
| Discussion                                     | 23a    | Provide a general interpretation of the results in the context of other evidence.                                                                                                                                                                                                    | p. 10-11                        |
|                                                | 23b    | Discuss any limitations of the evidence included in the review.                                                                                                                                                                                                                      | p. 11-12                        |
|                                                | 23c    | Discuss any limitations of the review processes used.                                                                                                                                                                                                                                | p. 11-12                        |
|                                                | 23d    | Discuss implications of the results for practice, policy, and future research.                                                                                                                                                                                                       | p. 11                           |
| <b>OTHER INFORMATION</b>                       |        |                                                                                                                                                                                                                                                                                      |                                 |
| Registration and protocol                      | 24a    | Provide registration information for the review, including register name and registration number, or state that the review was not registered.                                                                                                                                       | p. 2 & 4                        |
|                                                | 24b    | Indicate where the review protocol can be accessed, or state that a protocol was not prepared.                                                                                                                                                                                       | p. 2 & 4                        |
|                                                | 24c    | Describe and explain any amendments to information provided at registration or in the protocol.                                                                                                                                                                                      | p. 6                            |
| Support                                        | 25     | Describe sources of financial or non-financial support for the review, and the role of the funders or sponsors in the review.                                                                                                                                                        | No support for review           |
| Competing interests                            | 26     | Declare any competing interests of review authors.                                                                                                                                                                                                                                   | No conflicts to declare         |
| Availability of data, code and other materials | 27     | Report which of the following are publicly available and where they can be found: template data collection forms; data extracted from included studies; data used for all analyses; analytic code; any other materials used in the review.                                           | Available on request            |



# PRISMA 2020 Checklist

- 1
- 2
- 3
- 4
- 5
- 6
- 7
- 8
- 9
- 10
- 11
- 12
- 13
- 14
- 15
- 16
- 17
- 18
- 19
- 20
- 21
- 22
- 23
- 24
- 25
- 26
- 27
- 28
- 29
- 30
- 31
- 32
- 33
- 34
- 35
- 36
- 37
- 38
- 39
- 40
- 41
- 42
- 43
- 44
- 45
- 46
- 47

From: Page MJ, McKenzie JE, Bossuyt PM, Boutron I, Hoffmann TC, Mulrow CD, et al. The PRISMA 2020 statement: an updated guideline for reporting systematic reviews. BMJ 2021;372:n71. doi: 10.1136/bmj.n71  
 For more information, visit: <http://www.prisma-statement.org/>

For peer review only

# BMJ Open

## Effect of remote patient monitoring for patients with chronic kidney disease who perform dialysis at home: a systematic review

|                                 |                                                                                                                                                                                                                                                                                               |
|---------------------------------|-----------------------------------------------------------------------------------------------------------------------------------------------------------------------------------------------------------------------------------------------------------------------------------------------|
| Journal:                        | <i>BMJ Open</i>                                                                                                                                                                                                                                                                               |
| Manuscript ID                   | bmjopen-2022-061772.R2                                                                                                                                                                                                                                                                        |
| Article Type:                   | Original research                                                                                                                                                                                                                                                                             |
| Date Submitted by the Author:   | 07-Oct-2022                                                                                                                                                                                                                                                                                   |
| Complete List of Authors:       | Nygård, Henriette; Norwegian Institute of Public Health, Health; University of Tromso Department of Community Medicine<br>Nguyen, Lien; Norwegian Institute of Public Health<br>Berg , Rigmor C ; Norwegian Institute of Public Health; University of Tromso Department of Community Medicine |
| <b>Primary Subject Heading</b>: | Renal medicine                                                                                                                                                                                                                                                                                |
| Secondary Subject Heading:      | Health informatics, Health services research, Nursing, Patient-centred medicine, Renal medicine                                                                                                                                                                                               |
| Keywords:                       | Telemedicine < BIOTECHNOLOGY & BIOINFORMATICS, Dialysis < NEPHROLOGY, End stage renal failure < NEPHROLOGY, Adult nephrology < NEPHROLOGY, Chronic renal failure < NEPHROLOGY, Health informatics < BIOTECHNOLOGY & BIOINFORMATICS                                                            |
|                                 |                                                                                                                                                                                                                                                                                               |

SCHOLARONE™  
Manuscripts



I, the Submitting Author has the right to grant and does grant on behalf of all authors of the Work (as defined in the below author licence), an exclusive licence and/or a non-exclusive licence for contributions from authors who are: i) UK Crown employees; ii) where BMJ has agreed a CC-BY licence shall apply, and/or iii) in accordance with the terms applicable for US Federal Government officers or employees acting as part of their official duties; on a worldwide, perpetual, irrevocable, royalty-free basis to BMJ Publishing Group Ltd ("BMJ") its licensees and where the relevant Journal is co-owned by BMJ to the co-owners of the Journal, to publish the Work in this journal and any other BMJ products and to exploit all rights, as set out in our [licence](#).

The Submitting Author accepts and understands that any supply made under these terms is made by BMJ to the Submitting Author unless you are acting as an employee on behalf of your employer or a postgraduate student of an affiliated institution which is paying any applicable article publishing charge ("APC") for Open Access articles. Where the Submitting Author wishes to make the Work available on an Open Access basis (and intends to pay the relevant APC), the terms of reuse of such Open Access shall be governed by a Creative Commons licence – details of these licences and which [Creative Commons](#) licence will apply to this Work are set out in our licence referred to above.

Other than as permitted in any relevant BMJ Author's Self Archiving Policies, I confirm this Work has not been accepted for publication elsewhere, is not being considered for publication elsewhere and does not duplicate material already published. I confirm all authors consent to publication of this Work and authorise the granting of this licence.

1  
2  
3 1 **Title**  
4

5 2 Effect of remote patient monitoring for patients with chronic kidney disease who perform  
6 3 dialysis at home: a systematic review  
7  
8

9  
10 4 **Corresponding author**  
11

12 5 Henriette Tyse Nygård, Buggemyra 1, 5378 Klokkevik, Norway. hettny@gmail.com  
13

14 6 **Authors**  
15

16  
17 7 Henriette Tyse Nygård, Norwegian Institute of Public Health, Oslo, Norway, University of  
18 8 Tromsø, Tromsø, Norway, and Haukeland University Hospital, Bergen, Norway  
19

20  
21 9 Lien H. Nguyen, Norwegian Institute of Public Health, Oslo, Norway  
22

23 10 Rigmor C Berg, Norwegian Institute of Public Health, Oslo, Norway, and University of  
24 11 Tromsø, Tromsø, Norway  
25  
26

27 12 **Acknowledgements:** We are grateful to Elisabet Hafstad, Norwegian Institute of Public  
28 13 Health, for peer review of the systematic search strategies  
29  
30

31 14  
32

33  
34 15 **Word count:** 3998  
35

36 16  
37  
38  
39  
40  
41  
42  
43  
44  
45  
46  
47  
48  
49  
50  
51  
52  
53  
54  
55  
56  
57  
58  
59  
60



1  
2  
3 1  
45 2 **Abstract**

6  
7 3 **Objective:** The purpose of the systematic review was to assess the effectiveness of remote  
8 4 patient monitoring (RPM) follow-up compared to standard care, for patients with chronic  
9 5 kidney disease (CKD) who perform dialysis at home.

10  
11  
12 6 **Methods:** We conducted a systematic review in accordance with international guidelines. We  
13 7 performed systematic searches for publications from 2015-2021 in five databases (e.g.  
14 8 Medline, Cinahl, Embase) and a search for grey literature in reference lists. Included effect  
15 9 measures were quality of life, hospitalisation, technical failure as the cause for transfer to a  
16 10 different dialysis modality, infections, and time patients use for travel. Screening of literature,  
17 11 data extraction, risk of bias assessment, and certainty of evidence assessment (using the  
18 12 Grading of Recommendations Assessment, Development, and Evaluation approach) were  
19 13 done by two researchers. We conducted metaanalyses when possible.

20  
21  
22 14 **Results:** Seven studies met the inclusion criteria, of which two were randomised controlled  
23 15 trials and five were retrospective cohort studies with control groups. The studies included  
24 16 9,975 participants from five countries, who were a good representation of dialysis patients in  
25 17 high- and upper-middle-income countries. The patients were on peritoneal dialysis (six  
26 18 studies) or home hemodialysis (one study). There was very low certainty of evidence for the  
27 19 outcomes, except for hospitalisations: There was low certainty evidence from three cohort  
28 20 studies for fewer hospitalisation days in the RPM group. No studies included data for time  
29 21 patients used for travel.

30  
31  
32 22 **Conclusion:** We found low to very low certainty evidence that indicate there may be positive  
33 23 effects of RPM follow-up, in comparison to standard care only, for adult patients with CKD  
34 24 who perform dialysis at home. Offering RPM follow-up for home dialysis patients as an  
35 25 alternative or supplement to standard care appears to be safe and provide health benefits such  
36 26 as fewer hospitalisation days. Future implementation should be coupled with robust, high  
37 27 quality evaluations.

38 28 **Protocol:** Pre-registered in PROSPERO (CRD42021281779).

39 29 **Strength and limitations of this study**

- 40  
41  
42 30 - To our knowledge, this is the first systematic review to assess the effectiveness and  
43 31 safety of remote patient monitoring follow-up for adult patients with dialysis-

1 dependent chronic kidney disease on home dialysis (hemodialysis and peritoneal  
2 dialysis).

- 3 - Our systematic review was conducted in line with guidelines from the Cochrane and  
4 GRADE working group. The researchers specialise in systematic review research, one  
5 researcher is a registered nurse with long and diverse nephology experience, and the  
6 searches were conducted by a search specialist.
- 7 - Due to study heterogeneity, inconsistent measurement and reporting, our ability to  
8 conduct metaanalyses was limited.

## 10 **Introduction**

11 Chronic kidney disease (CKD) is a significant public health concern, with 8-16% of the  
12 world's population affected.<sup>1</sup> It is characterised by a need for close monitoring, poor health  
13 outcomes, and a high economic burden for society as well as for the individual.<sup>2</sup> The world's  
14 population is growing older, and with CKD prevalence rising parallel with age,<sup>2</sup> an increasing  
15 number of people will continue to need monitoring and treatment with dialysis. There are two  
16 main types of dialysis: Peritoneal dialysis (PD) and hemodialysis (HD). Both are suitable  
17 treatment options when the kidneys are unable to filter the blood sufficiently.<sup>3</sup>

18 With the use of technology, there are encouraging possibilities for thorough patient  
19 follow-up, and at the same time, human resource savings.<sup>4-6</sup> Both PD and HD can be  
20 performed at home. With home dialysis, the patients receive comprehensive training arranged  
21 by staff at a dialysis centre to ensure that they have the skills and knowledge required to  
22 perform the treatment at home.<sup>3 7</sup> While dialysis is time-consuming regardless of location,  
23 patients on home dialysis are not dependent on hospital service hours and may experience  
24 more freedom than patients receiving in-centre dialysis.<sup>8 9</sup> Additionally, for patients on in-  
25 centre dialysis, the burden of time spent commuting between home and hospital can be  
26 extensive. They often also spend a substantial amount of time waiting for transport and  
27 waiting to be assisted by hospital staff for connection and disconnection from HD. Research  
28 shows that travel time to dialysis exceeding 60 minutes is associated with significantly  
29 decreased health-related quality of life (QoL) and significantly increased mortality risk  
30 compared to patients who travel 15 minutes or less.<sup>10</sup> With dialysis at home, it is reasonable to  
31 expect considerable time savings for the patients as well as improved health-related QoL.

1  
2  
3 1 In healthcare there is increasing interest in utilising technology-based interventions.  
4  
5 2 Telemedicine and e-health are broad terms used when medical treatment, examination, or  
6  
7 3 patient follow-up is done from a distance.<sup>11</sup> Homecare telehealth is another related term, and  
8  
9 4 remote patient monitoring (RPM) is a subcategory thereof. RPM uses computer systems or  
10  
11 5 software application technology that transfers patient-generated data to healthcare  
12  
13 6 professionals.<sup>12</sup> Given the intervention considered in this systematic review is internet  
14  
15 7 dependent, we will use the term RPM. RPM can give the patient quick access to medical  
16  
17 8 expertise, independent of the distance to a treatment centre, and provides healthcare teams  
18  
19 9 with valuable information about the patient's condition. Thus, RPM can be a tool to empower  
20  
21 10 patients in self-care and for healthcare providers to offer support from a distance.<sup>11</sup>  
22  
23 11 Qualitative studies from the U.K. and Norway suggest that patients on home dialysis have a  
24  
25 12 positive attitude towards the use of RPM and believe that this could decrease anxiety and  
26  
27 13 make it easier for more patients to choose home dialysis.<sup>13 14</sup> In a recent pilot study from Italy,  
28  
29 14 patients overcame physical, cognitive, and psychological barriers to PD by RPM follow-up.<sup>15</sup>

30  
31 15 Strategies to switch more patients to home dialysis may have positive impacts on the  
32  
33 16 patients' daily life,<sup>14 16</sup> decrease mortality,<sup>17</sup> and offer economic savings for the patients as  
34  
35 17 well as for society.<sup>16 18</sup> RPM holds much promise for enhancing follow up of CKD patients on  
36  
37 18 dialysis and it is critical to determine whether and which strategies are effective at improving  
38  
39 19 outcomes. RPM patient follow-up is seemingly already expanding its reach. Our Google  
40  
41 20 Scholar search in December 2021 showed that there has been a 200% increase in records  
42  
43 21 about e-health home dialysis from 2018 to 2021. Although interest in nephrology and e-  
44  
45 22 health, including RPM, is increasing, to date, there are no systematic reviews about the  
46  
47 23 effectiveness and safety of RPM follow-up including adult patients with dialysis-dependent  
48  
49 24 CKD on home dialysis (HD and PD). We aimed to conduct a systematic review on the  
50  
51 25 effectiveness of RPM follow-up compared to standard care, for adult patients with CKD who  
52  
53 26 perform dialysis at home.

## 54 27 **Methods**

55 28 We conducted this systematic review in accordance with guidelines set forth in the Cochrane  
56  
57 29 Handbook for Systematic Reviews of Interventions version 6.2.<sup>19</sup> The pre-specified protocol  
58  
59 30 was registered in PROSPERO (CRD42021281779) and we report in line with the Preferred  
60  
31 Reporting for Systematic Reviews and Metaanalyses (PRISMA) statement.<sup>20</sup>

### 1 *Search strategy and selection*

2 The reviewers (HN, RB) prepared the search strategy in collaboration with a research  
3 librarian (LN), and a second research librarian peer-reviewed the search strategy. The  
4 librarian (LN) conducted searches in August 2021 in CINAHL (EBSCO), EMBASE (OVID),  
5 Medline (OVID), Cochrane Database of Systematic Reviews, and CENTRAL. The search  
6 included both subject headings (e.g. MeSH in Medline) and text words. Available  
7 Supplemental Appendix 1. In addition, the two reviewers conducted hand searches in the  
8 reference lists of the included studies.

9 The basis for the search was the inclusion criteria. We applied the (S)PICO model,  
10 which directs attention to the study design, population, intervention, comparison, and  
11 outcomes.<sup>21</sup> Eligible study designs were primary intervention studies with a control group.  
12 That is, randomised controlled trials (RCTs), non-randomised controlled studies, controlled  
13 before-after studies, and cohort studies with a control group. Study participants needed to be  
14 18 years or older, with dialysis dependent CKD who performed dialysis at home (HD or PD).  
15 The patients could perform dialysis independently or with assistance of family or other carers.  
16 CKD did not have to be the only disease of the study participant. This is because patients with  
17 CKD are known to have a higher burden of comorbidities than the average population.<sup>22</sup> The  
18 eligible intervention was RPM, understood as internet dependent technology used to transfer  
19 treatment data from the patient's home to a healthcare institution.<sup>12</sup> This included video  
20 consultations, applications installed on the patient's phone, computer, or a tablet as well as  
21 technology that transferred treatment data directly from the dialysis machine to healthcare  
22 providers.<sup>12</sup> RPM that was not directly treatment related was excluded. This included, but was  
23 not limited to, apps for lifestyle changes, interventions for blood pressure control, and  
24 interventions for diabetes management. The comparator was standard care, understood as  
25 patients performing dialysis in-centre or at home and having regular in-person consultations at  
26 a HD or PD centre. Included effect measures were QoL (measured with any type of QoL  
27 assessment tool), hospitalisation (all-cause, disease-specific, and number of hospitalisation  
28 days), technical failure as the cause for transfer to a different dialysis modality, hospital  
29 registered infections not requiring hospitalisation, and time patients use for travel. Lastly,  
30 studies had to be published in a Scandinavian or English language, in 2015-2021 because we  
31 wanted to identify all studies relevant to the question and today's clinical situation, being  
32 cognisant that technology is rapidly improving.

1 We imported all records from the searches into an EndNote library and removed all  
2 duplicate entries. Two researchers (HN, RB) independently screened all titles and abstracts  
3 from the literature searches in accordance with the predetermined inclusion and exclusion  
4 criteria. All abstracts that appeared to fit the inclusion criteria or did not provide enough  
5 information, were promoted to full text screening. At each level, we evaluated the identified  
6 records independently of one another using a pre-developed inclusion form. The final  
7 determination to include or exclude was made together and any disagreements were solved by  
8 discussion. Excluded studies with justifications are available in Supplemental Appendix 2.

### 9 *Risk of bias assessment and data extraction*

10 To assess the included studies for risk of bias (RoB) we used two different instruments: The  
11 Newcastle-Ottawa scale for cohort studies,<sup>23</sup> and Cochrane Risk of Bias Tool for RCTs.<sup>19</sup>  
12 Two researchers (HN, RB) conducted independent risk of bias assessments and then agreed  
13 on a final RoB evaluation, with disagreements solved by discussion.

14 One researcher (HN) created a standard extraction form and extracted data from all  
15 included studies. The information extracted from the studies was: title, authors, publication  
16 details, study design, aim of the study, study setting (location and time the study was  
17 conducted), characteristics of included participants (age, gender etc.), characteristics of the  
18 intervention, study setting, outcomes, and results. Whenever information was available,  
19 dichotomous and continuous data for all eligible outcomes were extracted. HN contacted  
20 several authors for additional data, but did not receive a reply. RB assessed the extracted data  
21 for completeness and accuracy and any disagreements were solved by further inspection of  
22 the publication and discussion.

### 23 *Analysis and assessment of the certainty of the evidence (GRADE)*

24 We extracted crude outcome data for all eligible outcomes when postscores for both  
25 intervention and control groups were available and, when such data were available, adjusted  
26 outcome data (adjusted comparison (effect) estimates and their standard errors or 95%  
27 confidence intervals, CI). We provide dichotomous outcomes as the number of events and  
28 number of people in groups as proportions, risk ratio (RR), incident RR (IRR) or odds ratio  
29 (OR) as appropriate. Continuous outcomes are shown as mean difference (MD) and standard  
30 deviations (SD), or the most appropriate presentation based on the available data in the  
31 included studies.

1 We evaluated the characteristics of the studies' (S)PICO and when they were  
2 considered sufficiently similar, and data were available, we conducted metaanalyses. The  
3 judgments about whether metaanalyses were appropriate were based on recommendations in  
4 the Cochrane Handbook.<sup>19</sup> We used Mantel-Haenszel random effects metaanalysis for  
5 dichotomous outcomes and we presented the relative risks and their corresponding 95% CI (it  
6 was not possible to metaanalyse any continuous outcomes). We also examined between-study  
7 heterogeneity using visual inspection of CIs, the Chi-square test, and Isquare statistic,  
8 quantifying the degree of heterogeneity as described in the Cochrane Handbook.<sup>19</sup> We used  
9 RevMan version 5.4, the latest version of the Cochrane metaanalysis software.<sup>24</sup> When the  
10 studies' (S)PICOs or results were too heterogeneous to pool statistically, or data were  
11 unavailable, we reported the results narratively, in text and tables. We planned to perform a  
12 subgroup analysis for the outcome technical failure, but this was not possible due to lack of  
13 data.

14 We assessed the certainty of the evidence using the Grading of Recommendations  
15 Assessment, Development and Evaluation (GRADE) framework.<sup>25</sup> With regard to results that  
16 could not be metaanalysed, we followed the Synthesis Without Meta-analysis (SWiM)  
17 guideline.<sup>26</sup>

## 18 **Patient and public involvement**

19 Due to the nature of the study (systematic review), no patients were involved.

## 20 **Results**

21 The searches returned 451 references after removal of duplicates (Figure 1). We read 24  
22 reports in full text, including one study identified from the hand search in reference lists. The  
23 most common primary reasons for exclusion were that there was no control group or it was  
24 the wrong participants or outcomes. Seven studies published between 2018-2021 were  
25 eligible for inclusion.<sup>27-33</sup>

### 26 *Description of the studies*

27 The seven included studies consisted of two RCTs and five retrospective cohort studies (Table  
28 1). They were conducted in five different countries. There were two studies each from  
29 Columbia and USA, and one study each from China, Italy, and South Korea. Three were set  
30 in a single PD centre, four took place in two or more renal care centres and the two largest  
31 studies took place in the USA with one including 55 home HD centres and another 931  
32 Fresenius PD clinics.



1 patients were on PD, they lived at home, and performed dialysis independently or with the  
2 assistance of a carer.

3 As per our inclusion criteria, the intervention was remote patient monitoring with  
4 different types of software that collected treatment data and transferred it to a treatment centre  
5 (added by the patients or automatically collected). The specific type of RPM varied across the  
6 studies. Four studies, Corzo et al.,<sup>29</sup> Jung et al.,<sup>30</sup> Milan et al.<sup>31</sup> and Sanabria et al.<sup>32</sup> used the  
7 automated PD system from Baxter: Homechoice Claria™, connected to the Sharesource  
8 platform. Milan et al.<sup>31</sup> additionally used the sleep-safe harmony home bridge system from  
9 Fresenius for half of the patients. Weinhandl & Collins<sup>33</sup> used the Nx2me telehealth platform  
10 for home HD patients. The software collects treatment data and transmits it to the healthcare  
11 providers, and the prescription can be changed ‘from afar’. Chaudhuri et al.<sup>28</sup> used the  
12 “Patient hub” application. The PD patients can see their prescription, laboratory results, and  
13 enter treatment data, and the app transmits the patient-entered data to the healthcare providers.  
14 Cao et al.<sup>27</sup> used the “kidney cleaning group” instant messaging software. Technical support,  
15 nurse support, physician support, and support from fellow patients was available through chat  
16 and video. The patients were divided in smaller groups and one experienced PD patient with  
17 few complications was the group leader. Educational resources were also available in the  
18 platform. In addition, in all studies, all patients had or were likely to receive some level of  
19 standard care. This was generally described as in-person follow-up at the hospital. However,  
20 the frequency of standard care ranged from weekly (n=1) to every three months (n=1). Most  
21 studies had or were likely to have an in-person review monthly (n=5). The follow-up time  
22 ranged from 6 to 12 months.

### 23 *Risk of bias of included studies*

24 The RCTs had moderate risk of bias, while the retrospective cohort studies were rated fair to  
25 good methodological quality, i.e. having low to moderate risk of bias (Table 1 and  
26 Supplemental Appendix 3). With respect to the studies’ sources of funding, three of the  
27 observational studies received financial support from the provider of the intervention  
28 (Supplemental Appendix 3).

### 29 *Effect of RPM versus standard care*

30 Across the studies, there were data on four of our five pre-determined outcomes:  
31 Hospitalisation,<sup>27 28 31 32</sup> infections,<sup>27</sup> technical failure as the cause for transfer to a different  
32 dialysis modality,<sup>27-29 31-33</sup> and QoL.<sup>30 31</sup> Due to the inconsistent measurement of outcomes,  
33 and inconsistent and incomplete reporting of outcome results in the studies, our ability to



1 synthesise data was limited. The results are described in the text below, Table 2, and Figure 2.  
 2 The GRADE assessments in Table 3 show that there was low to very low certainty of  
 3 evidence for all of the outcomes. This means that the effects are largely uncertain. No  
 4 publications included data for the outcome 'time patients used for travel'.

5 **Table 2. Study outcomes and effect estimates**

| Study                                                                           | Outcome                                      | Result/Effect estimate (95% CI)                                                                                                          |
|---------------------------------------------------------------------------------|----------------------------------------------|------------------------------------------------------------------------------------------------------------------------------------------|
| <b>Hospitalisations</b>                                                         |                                              |                                                                                                                                          |
| Chaudhuri 2020                                                                  | Hospitalisation days (12 mo)                 | Adj. IRR 0.68 (0.55-0.83)                                                                                                                |
| Milan 2020                                                                      | Hospitalisation days (6 mo)                  | Median 5 days difference P 0.55                                                                                                          |
| Sanabria 2019                                                                   | Hospitalisation days (9 mo)                  | Adj. IRR 0.46 (0.23-0.92)                                                                                                                |
| Cao 2018                                                                        | Hospitalisation all-cause (11 mo)            | RR 0.57 (0.17-1.88)                                                                                                                      |
| Chaudhuri 2020                                                                  | Hospitalisation all-cause (12 mo)            | Adj. IRR 0.74 (0.66-0.83)                                                                                                                |
| Milan 2020                                                                      | Hospitalisation all-cause (11 mo)            | RR 1.33 (0.63-2.81)                                                                                                                      |
| Sanabria 2019                                                                   | Hospitalisation all-cause (9 mo)             | Adj. IRR 0.61 (0.39-0.95)                                                                                                                |
| <b>Infections</b>                                                               |                                              |                                                                                                                                          |
| Cao 2018                                                                        | Infections (11 mo)                           | More peritonitis (60 in RPM group vs 40 in control group per patient month) but less exit site infections with RPM (RR= 0.45, 0.12-1.68) |
| <b>Technical failure as cause for transfer to a different dialysis modality</b> |                                              |                                                                                                                                          |
| Cao 2018                                                                        | Technical failure (11 mo)                    | RR 1.00 (0.26-3.86)                                                                                                                      |
| Chaudhuri 2020                                                                  | Technical failure (12 mo)                    | Adj. HR 0.79 (0.63-1.00)                                                                                                                 |
| Corzo 2020                                                                      | Technical failure (8 mo)                     | IRR 0.88 (0.41-1.74)                                                                                                                     |
| Sanabria 2019                                                                   | Technical failure (subgroup) (9 mo)          | RR 0.97 (0.42-2.25)                                                                                                                      |
| Weinhandl 2018                                                                  | Technical failure (subgroup) (11 mo)         | Adj. HR 0.66 (0.50-0.86)                                                                                                                 |
| <b>Quality of life</b>                                                          |                                              |                                                                                                                                          |
| Jung 2021                                                                       | KDQOL -Patient satisfaction questions (6 mo) | Mean 75.5 in RPM group vs 73.7 in SC group, P 0.64                                                                                       |
| Milan 2020                                                                      | KDQOL -Patient satisfaction questions (6 mo) | Median 83.3 in both groups, P 0.99                                                                                                       |
| Jung 2021                                                                       | KDQOL -Dialysis staff encouragement (6 mo)   | Mean 93.1 in RPM group vs 97.1 in SC group, P 0.05                                                                                       |
| Milan 2020                                                                      | KDQOL -Dialysis staff encouragement (6 mo)   | Median 100 in both groups, P 0.16                                                                                                        |

6 Legend: Adj=Adjusted (listed in Supplemental Appendix 3); HR=Hazard ratio; IRR=Incident  
 7 rate ratio (compares the incidence rates between two different groups and shows if exposure  
 8 to something increases or decreases the rate of some incidence -- if IRR is 1 then there is no  
 9 difference); mo=Months; KDQOL=kidney disease quality of life; RPM=Remote patient  
 10 monitoring; RR=Relative risk; SC=Standard care

12 **Table 3: Summary of findings (GRADE)**

**Population:** Patients with CKD

**Countries:** China, Columbia, Italy, South Korea, USA

**Intervention:** RPM

**Comparison:** Standard care

| Outcome,<br>follow-up time             | Anticipated absolute effects* (95% CI)                                                                    |                       | Relative effect (95% CI) | No. of participants (Studies) | Quality of evidence (GRADE)   |
|----------------------------------------|-----------------------------------------------------------------------------------------------------------|-----------------------|--------------------------|-------------------------------|-------------------------------|
|                                        | Assumed risk with control                                                                                 | Assumed risk with RPM |                          |                               |                               |
| <b>Hospitalisations (6-12 months)</b>  |                                                                                                           |                       |                          |                               |                               |
| Days                                   | All 3 cohort studies showed that there were fewer hospitalisation days in the RPM group (Table 2)         |                       |                          | 6,736 (3)                     | ⊕⊕○○<br>LOW                   |
| All-cause                              | 3 of 4 studies (1 RCT, 3 cohort) showed that there were fewer hospitalisations in the RPM group (Table 2) |                       |                          | 6,936 (4)                     | ⊕○○○<br>VERY LOW <sup>1</sup> |
| Disease-specific                       | 30/198 (15.2%)                                                                                            | 10/110 (9.1%)         | RR 0.62 (0.31 to 1.24)   | 308 (2 cohort)                | ⊕○○○<br>VERY LOW <sup>2</sup> |
| <b>Infections (11 months)</b>          |                                                                                                           |                       |                          |                               |                               |
|                                        | 1 RCT reported more peritonitis but fewer exit site infections with RPM (Table 2)                         |                       |                          | 160 (1)                       | ⊕○○○<br>VERY LOW <sup>3</sup> |
| <b>Technical failure (6-12 months)</b> |                                                                                                           |                       |                          |                               |                               |
|                                        | 521/2230 (23.4%)                                                                                          | 136/786 (17.3%)       | RR 0.78 (0.66 to 0.93)   | 2856 (3 cohort)               | ⊕○○○<br>VERY LOW <sup>4</sup> |
|                                        | 2 of 3 studies (1 RCT, 2 cohort) reported fewer failures with RPM (Table 2)                               |                       |                          | 7161 (3)                      |                               |
| <b>Quality of life (6 months)</b>      |                                                                                                           |                       |                          |                               |                               |
| Patient satisfaction                   | 1 RCT found higher QoL in the RPM group, 1 cohort found QoL was similar in the two groups (Table 2)       |                       |                          | 130 (2)                       | ⊕○○○<br>VERY LOW <sup>5</sup> |

|                                                                                                                                                                                                                                                                                                                                                                                                                         |                                                                                                     |         |                               |
|-------------------------------------------------------------------------------------------------------------------------------------------------------------------------------------------------------------------------------------------------------------------------------------------------------------------------------------------------------------------------------------------------------------------------|-----------------------------------------------------------------------------------------------------|---------|-------------------------------|
| Dialysis staff encouragement                                                                                                                                                                                                                                                                                                                                                                                            | 1 RCT found higher QoL in the RPM group, 1 cohort found QoL was similar in the two groups (Table 2) | 130 (2) | ⊕○○○<br>VERY LOW <sup>5</sup> |
| <b>Travel time</b>                                                                                                                                                                                                                                                                                                                                                                                                      | 0 studies assess this outcome                                                                       |         | No evidence                   |
| <p>1. Downgraded by 1 level because of moderate risk of bias in 1 study and inconsistency</p> <p>2. Downgraded by 1 level because of imprecision</p> <p>3. Downgraded by 3 levels because of moderate risk of bias, inconsistency, imprecision</p> <p>4. Downgraded by 1 level because of moderate risk of bias in 1 study and imprecision</p> <p>5. Downgraded by 1 level because of inconsistency and imprecision</p> |                                                                                                     |         |                               |
| <p>CI: Confidence interval; RCT: Randomised controlled study; SD: Standard deviation. *The risk in the intervention group (and its 95% confidence interval) is based on the assumed risk in the comparison group and the relative effect of the intervention (and its 95% CI).</p>                                                                                                                                      |                                                                                                     |         |                               |

## Hospitalisations

One RCTs and three observational studies from Italy, Colombia, China, and the USA examined the effect of RPM on hospitalisations.<sup>27 28 31 32</sup> However, the outcome was reported differently across the studies, as hospitalisation days/days admitted, all-cause hospitalisations, and disease-specific hospitalisations (caused by overhydration, access dysfunction, and infections).

Hospitalisation days. The three observational studies, Chaudhuri et al.,<sup>28</sup> Milan et al.,<sup>31</sup> and Sanabria et al.<sup>32</sup>, all found fewer hospitalisation days in the RPM group than the control group (Table 2). The results in Sanabria et al.<sup>32</sup> were from a matched sample, as data for the whole sample was not available. This study showed the largest effect with a difference of six hospitalisation days (IRR 0.46, 0.23-0.92).

All-cause hospitalisations. One RCT<sup>27</sup> and three observational studies<sup>28 31 32</sup> had data on general, all-cause hospitalisations. While three of the four studies showed that RPM users had less all-cause hospitalisations than patients with standard care only, the fourth study favoured standard care (Table 2).

Disease-specific hospitalisations. The results on disease-specific hospitalisations from two observational studies, Milan et al.,<sup>31</sup> and Sanabria et al.<sup>32</sup> could be pooled in a metaanalysis (Figure 2). The non-significant result suggested there were fewer disease-specific hospitalisations in the RPM group than in the control group (RR 0.62, 95% CI 0.31-1.24).

1 Milan et al.<sup>31</sup> defined disease-specific hospitalisations as infections (peritonitis and exit site),  
2 overhydration, and access dysfunction. Sanabria et al.<sup>32</sup> provided numbers for hospitalisations  
3 due to peritonitis and overhydration.

#### 4 Infections

5 Only one RCT, from China, examined the effectiveness of RPM follow-up for PD patients on  
6 infections.<sup>27</sup> The result for this outcome was inconclusive, as Cao et al. found more peritonitis  
7 but fewer exit site infections with RPM. It was not specified whether the infections were  
8 treated at home or in the hospital.

#### 9 Technical failure as the cause for transfer to a different dialysis modality

10 One RCT from China<sup>27</sup> found no difference between the groups while five observational  
11 studies from the USA<sup>28 33</sup>, Colombia<sup>29 32</sup>, and Italy<sup>31</sup> consistently reported less technical  
12 failure as cause for transfer to a different dialysis modality in the RPM group compared to the  
13 control group (Table 2). Three of the cohort studies could be pooled in a metaanalysis; the  
14 result implies benefit of RPM (0.78, 95% CI 0.66, 0.92) (Figure 2). Two of the studies<sup>32 33</sup>  
15 gave data on novice patients with less than three months treatment duration at baseline,  
16 indicating a positive, but non-significant effect of RPM in new patients (Table 2).

#### 17 Self-reported Quality of Life

18 Both studies, one RCT<sup>30</sup> and one observational study,<sup>31</sup> reporting on quality of life used the  
19 tool 'The short form of kidney disease quality of life' (KDQOL), which is an adaptation of  
20 SF-36.<sup>34</sup> All answers were transformed into pre-coded numeric values with a range from 0-  
21 100, where 100 was the highest QoL.<sup>35</sup> Neither studies offered an overall total score across  
22 the questions/areas, and we selected the two questions/areas that we considered most relevant  
23 (patient satisfaction and dialysis staff encouragement). For both patient satisfaction and  
24 dialysis staff encouragement, Milan et al.<sup>31</sup> found the same score in both groups, while Jung et  
25 al.<sup>30</sup> found a higher score in the RPM group than the control group concerning patient  
26 satisfaction, but opposite for dialysis staff encouragement (Table 2).

### 27 **Discussion**

#### 28 *Principal findings*

29 This systematic review advances the evidence on the effects of RPM for patients with dialysis  
30 dependent CKD on home dialysis, including home HD and PD. Our findings are in line with  
31 previous research<sup>36 37</sup> and document that there is no conclusive evidence, but that positive  
32 effects of RPM are suggested for clinical outcomes, technical failure, and quality of life.

1  
2  
3 1 The results consistently suggest that RPM reduces hospitalisations and the number of  
4 2 days the patient is admitted. It was especially convincing that Milan et al.<sup>31</sup> observed a median  
5 3 difference of five fewer hospitalisation days in the RPM group over six months, because the  
6 4 patients on RPM had a worse comorbidity score. Furthermore, except for one study that found  
7 5 the same number of technical failures in both groups, the other five studies found less  
8 6 technical failure in the RPM group. In four of the studies measuring this outcome,  
9 7 prescriptions could be changed from the hospital without in-person consultations. In effect,  
10 8 RPM allows resolving technical issues early, thus preventing progression of technical failure  
11 9 to the stage where the patient would need to transfer to a different dialysis modality. Research  
12 10 has found great advantages with the technology displaying possible causes and solutions to  
13 11 problems, alarm indicators showing who to contact for guidance (nurse or technician), and  
14 12 reminders of activities that need to be performed.<sup>13-15</sup> Concerning quality of life, only two  
15 13 studies assessed this and the results showed the scores were comparable for the patients on  
16 14 RPM and usual care. Encouragingly, scores for quality of life improved slightly and patient  
17 15 satisfaction was higher than neutral. This is in line with a study from the U.S. that found that  
18 16 RPM increased patients' confidence and satisfaction with treatment because they felt more  
19 17 closely supported.<sup>38</sup> Lastly, no studies assessed time patients use for travel. However, research  
20 18 suggests that health-related quality of life and time patients use for travel are intertwined<sup>10</sup>  
21 19 and that dialysis free time and reduction of fatigue are highly valued outcomes by patients.<sup>9 39</sup>  
22 20 <sup>40</sup> This could reflect positively on quality of life.

23  
24  
25 21 Our results mirror two earlier systematic reviews on e-health interventions in PD  
26 22 patients<sup>36</sup> and in people with CKD.<sup>37</sup> Both reviews, with literature searches in 2018-2019,  
27 23 included a wide range of patients and e-health modalities, including mobile or tablet  
28 24 application, text or email messages, electronic monitors, internet/websites, and video or DVD.  
29 25 Consequently, there was minimal overlap in included studies: Only one review<sup>36</sup> included two  
30 26 of our included studies. Both reviews concluded that the quality of evidence for the  
31 27 effectiveness of e-health was low with uncertain effects, but that no adverse effects were  
32 28 indicated. Of note, a recent modelling analysis projected that in a cohort of 100 patients on  
33 29 automated PD over 1 year, RPM would lead to 27 fewer hospitalisations, 518 fewer  
34 30 hospitalization days, 31 additional months free of complications, and six fewer peritonitis  
35 31 episodes.<sup>41</sup>

### 1 *Implications*

2 Overall, the low to very low certainty of evidence on the effects of RPM for patients with  
3 dialysis dependent CKD on home dialysis prevents strong recommendations. Given RPM  
4 seems comparable to usual care, the absence of adverse effects and promising clinical effects,  
5 it seems advisable cautiously to implement RPM while concomitantly evaluating outcomes  
6 important for patients. Prior to recommending RPM for CKD patients on home dialysis, more  
7 trials are needed to be certain of its benefits over standard care, and to establish equity and  
8 cost effectiveness. A modelling analysis from the payer perspective has found that RPM is  
9 cost effective,<sup>41</sup> but economic evaluations of e-health interventions are scarce and highlights  
10 an important area for further research.<sup>5 42</sup> Additionally, patient groups should be involved in  
11 RPM implementation and evaluation, to maximize the potential for modification and  
12 ultimately effect.

13 Our review highlights the need for robust, high quality research on both PD and home  
14 HD, but especially for patients on home HD and patients whose home is in a nursing home.  
15 To our knowledge, home HD in nursing homes is rare, while PD is common. It is likely that  
16 nursing home staff aided by RPM support from specialist nurses at dialysis centres could  
17 provide invaluable assistance to frail CKD patients with great need for follow-up. For such  
18 patients and others with dialysis dependent CKD on home dialysis, time used for travel and  
19 dialysis free time is a patient-important outcome that warrants further research. It is  
20 reasonable to suspect substantial time-savings when follow-up is performed from afar and  
21 evidence from video consultations in patient follow-up are positive.<sup>15 43</sup> We encourage  
22 research on the combined use of video consultations and cloud-based technology on outcomes  
23 such as travel time, technical failure, and hospitalisations. Standardised outcomes in  
24 nephrology (SONG) have identified and prioritised outcomes for both HD and PD patients  
25 and can be a useful tool when planning outcomes in future research.<sup>44</sup>

### 26 *Strengths and limitations*

27 Our systematic review was conducted in line with guidelines from the Cochrane and GRADE  
28 working group. The outcome selection was in alignment with core outcomes recommended by  
29 the SONG initiative.<sup>44</sup> The researchers specialise in systematic review research, one  
30 researcher is a registered nurse with long and diverse nephrology experience, and the searches  
31 were conducted by a search specialist. Yet, it is possible that relevant studies have been  
32 missed and relevant studies have been published after our last search. Due to study  
33 heterogeneity, variability in intervention characteristics, inconsistent measurement and

1 reporting, our ability to conduct metaanalyses was limited. Therefore, it was neither possible  
2 to improve precision to any great extent, nor statistically assess potential differences across  
3 groups, such as type of platform or HD and PD. We contacted several authors asking for more  
4 data, but did not receive a reply. The low number of studies meant that we were unable to  
5 statistically check for publication bias. Given the modestly positive but varied results, we  
6 believe the potential for publication bias is low, but we recommend future reviews of a higher  
7 number of included studies to assess this potential bias. The imbalance in sample sizes across  
8 the studies, with two studies having a considerably larger sample size than the other five,  
9 influenced the results related to hospitalisations and technical failure. Both these two studies  
10 had low risk of bias, but three other studies had moderate risk of bias.

### 11 *Conclusion*

12 This systematic review summarises and presents low to very low evidence that indicate there  
13 may be positive effects of RPM follow-up, in comparison to standard care only, for adult  
14 patients with CKD who perform dialysis at home. Offering RPM follow-up for home dialysis  
15 patients as an alternative or supplement to standard care appears to be safe and provide health  
16 benefits, but future implementation should be coupled with robust, high quality evaluations.  
17 Despite the high interest in RPM and increasing demands for nephrology services, good  
18 quality evidence is still needed to determine their effectiveness.

### 20 **Contributors**

21 HN wrote the first draft. RB and HN contributed equally to the rest of the work. LN prepared  
22 and conducted the systematic searches and contributed with inputs on the final draft. We are  
23 grateful to [removed for blind review], for peer review of the systematic search strategies

### 24 **Competing interests**

25 'None declared'.

### 26 **Ethical statement**

27 Not applicable

### 28 **Funding**

29 'This research received no specific grant from any funding agency in the public, commercial  
30 or not-for-profit sectors'.

## 1 **Exclusive licence**

2 Please confirm you agree with the following statement by ticking the box and then insert the  
3 licence statement in your manuscript file.

4 I, the Submitting Author has the right to grant and does grant on behalf of all authors of the  
5 Work (as defined in the below author licence), an exclusive licence and/or a non-exclusive  
6 licence for contributions from authors who are: i) UK Crown employees; ii) where BMJ has  
7 agreed a CC-BY licence shall apply, and/or iii) in accordance with the terms applicable for  
8 US Federal Government officers or employees acting as part of their official duties; on a  
9 worldwide, perpetual, irrevocable, royalty-free basis to BMJ Publishing Group Ltd (“BMJ”)  
10 its licensees and where the relevant Journal is co-owned by BMJ to the co-owners of the  
11 Journal, to publish the Work in BMJ Open and any other BMJ products and to exploit all  
12 rights, as set out in our licence.

13  
14 The Submitting Author accepts and understands that any supply made under these terms is  
15 made by BMJ to the Submitting Author unless you are acting as an employee on behalf of  
16 your employer or a postgraduate student of an affiliated institution which is paying any  
17 applicable article publishing charge (“APC”) for Open Access articles. Where the Submitting  
18 Author wishes to make the Work available on an Open Access basis (and intends to pay the  
19 relevant APC), the terms of reuse of such Open Access shall be governed by a Creative  
20 Commons licence – details of these licences and which Creative Commons licence will apply  
21 to this Work are set out in our licence referred to above.

## 22 **Data availability statement**

23 Data are available on reasonable request.

## 25 **References**

- 26 1. Chen TK, Knicely DH, Grams ME. Chronic Kidney Disease Diagnosis and Management:  
27 A Review. *JAMA* 2019;322(13):1294-304. doi: 10.1001/jama.2019.14745
- 28 2. Tonelli M, Riella M. Chronic kidney disease and the aging population. *Indian journal of*  
29 *nephrology* 2014;24(2):71-74. doi: 10.4103/0971-4065.127881
- 30 3. Sinnakirouchenan R, Holley JL. Peritoneal dialysis versus hemodialysis: risks, benefits,  
31 and access issues. *Adv Chronic Kidney Dis* 2011;18(6):428-32. doi:  
32 10.1053/j.ackd.2011.09.001 [published Online First: 2011/11/22]



- 1 4. Meld. St. 7 (2019–2020). Nasjonal helse- og sykehusplan 2020–2023: Helse- og  
2 omsorgsdepartementet; [cited 2021 12.09]. Available from:  
3 <https://www.regjeringen.no/no/dokumenter/meld.-st.-7-20192020/id2678667/>
- 4 5. Kitsiou S, Paré G, Jaana M, et al. Effectiveness of mHealth interventions for patients with  
5 diabetes: An overview of systematic reviews. *PLoS One* 2017;12(3):e0173160. doi:  
6 10.1371/journal.pone.0173160 [published Online First: 2017/03/02]
- 7 6. Widmer, R. Jay, et al. "Digital health interventions for the prevention of cardiovascular  
8 disease: a systematic review and meta-analysis." *Mayo Clinic Proceedings*. Vol. 90.  
9 No. 4. Elsevier, 2015
- 10 7. Helsedirektoratet. Nyresvikt - dialysepasienter som får hjemmedialyse: Helsedirektoratet;  
11 2018 [updated 2021 02.12; cited 2021 12.12]. Available from:  
12 [https://www.helsedirektoratet.no/statistikk/kvalitetsindikatorer/behandling-av-](https://www.helsedirektoratet.no/statistikk/kvalitetsindikatorer/behandling-av-sykdom-og-overlevelse/andel-dialysepasienter-som-har-hjemmedialyse)  
13 [sykdom-og-overlevelse/andel-dialysepasienter-som-har-hjemmedialyse](https://www.helsedirektoratet.no/statistikk/kvalitetsindikatorer/behandling-av-sykdom-og-overlevelse/andel-dialysepasienter-som-har-hjemmedialyse)
- 14 8. Helsedirektoratet. Handlingsplan for forebygging og behandling av kronisk nyresykdom  
15 (2011-2015) 2011 [cited 2021 11.09]. Available from:  
16 [http://www.nephro.no/foreningsnytt/Handlingsplan\\_forebygging\\_behandling\\_kronisk](http://www.nephro.no/foreningsnytt/Handlingsplan_forebygging_behandling_kronisk_nyresykdom.pdf)  
17 [\\_nyresykdom.pdf](http://www.nephro.no/foreningsnytt/Handlingsplan_forebygging_behandling_kronisk_nyresykdom.pdf).
- 18 9. Urquhart-Secord R, Craig JC, Hemmelgarn B, et al. Patient and Caregiver Priorities for  
19 Outcomes in Hemodialysis: An International Nominal Group Technique Study.  
20 *American Journal of Kidney Diseases* 2016;68(3):444-54. doi:  
21 <https://doi.org/10.1053/j.ajkd.2016.02.037>
- 22 10. Moist LM, Bragg-Gresham JL, Pisoni RL, et al. Travel Time to Dialysis as a Predictor of  
23 Health-Related Quality of Life, Adherence, and Mortality: The Dialysis Outcomes and  
24 Practice Patterns Study (DOPPS). *American Journal of Kidney Diseases*  
25 2008;51(4):641-50. doi: <https://doi.org/10.1053/j.ajkd.2007.12.021>
- 26 11. Braut GS. Telemedisin Store medisinske leksikon [updated 2020 15.06; cited 2021 10.10].  
27 Available from: <https://sml.sn.no/telemedisin>.
- 28 12. DelVecchio A. Definition, remote patient monitoring (RPM): Tech target, Search health  
29 IT; [updated April 2019; cited 2021 10.10]. Available from:  
30 <https://searchhealthit.techtarget.com/definition/remote-patient-monitoring-RPM>
- 31 13. Rajkomar A, Farrington K, Mayer A, et al. Patients' and carers' experiences of interacting  
32 with home haemodialysis technology: implications for quality and safety. *BMC*  
33 *Nephrology* 2014;15(1):195-95. doi: 10.1186/1471-2369-15-195
- 34 14. Rygh E, Arild E, Johnsen E, et al. Choosing to live with home dialysis-patients'  
35 experiences and potential for telemedicine support: a qualitative study. *BMC*  
36 *Nephrology* 2012;13(1):13-13. doi: 10.1186/1471-2369-13-13
- 37 15. Viglino G, Neri L, Barbieri S, et al. Videodialysis: a pilot experience of telecare for  
38 assisted peritoneal dialysis. *J Nephrol* 2020;33(1):177-82. doi: 10.1007/s40620-019-  
39 00647-6 [published Online First: 2019/09/19]
- 40 16. François K, Bargman JM. Evaluating the benefits of home-based peritoneal dialysis. *Int J*  
41 *Nephrol Renovasc Dis* 2014;7:447-55. doi: 10.2147/IJNRD.S50527
- 42 17. Marshall MR, Polkinghorne KR, Kerr PG, et al. Temporal Changes in Mortality Risk by  
43 Dialysis Modality in the Australian and New Zealand Dialysis Population. *American*  
44 *Journal of Kidney Diseases* 2015;66(3):489-98. doi:  
45 <https://doi.org/10.1053/j.ajkd.2015.03.014>
- 46 18. Walker RC, Howard K, Morton RL. Home hemodialysis: a comprehensive review of  
47 patient-centered and economic considerations. *Clinicoecon Outcomes Res* 2017;9:149-  
48 61. doi: 10.2147/CEOR.S69340
- 49 19. Higgins JPT TJ, Chandler J, Cumpston M, Li T, Page MJ, Welch VA (editors). *Cochrane*  
50 *Handbook for Systematic Reviews of Interventions* version 6.2 (updated February

- 2021); Cochrane; 2021 [cited 2021 12.09]. Available from:  
www.training.cochrane.org/handbook.
20. PRISMA transparent reporting of systematic reviews and meta-analyses [cited 2021 08.11]. Available from: <http://www.prisma-statement.org/>.
21. Straus SE, Glasziou P, Richardson WS, et al. Evidence-based medicine E-book: How to practice and teach EBM: Elsevier Health Sciences 2018.
22. Tonelli M, Wiebe N, Guthrie B, et al. Comorbidity as a driver of adverse outcomes in people with chronic kidney disease. *Kidney International* 2015;88(4):859-66. doi: <https://doi.org/10.1038/ki.2015.228>
23. Wells GA, Shea B, O'Connell D, et al. The Newcastle-Ottawa Scale (NOS) for assessing the quality of nonrandomised studies in meta-analyses: The Ottawa hospital research institute; [cited 2021 21.10]. Available from:  
[http://www.ohri.ca/programs/clinical\\_epidemiology/oxford.asp](http://www.ohri.ca/programs/clinical_epidemiology/oxford.asp)
24. Cochrane RevMan Cochrane Training [updated Latest version of RevMan 5.4.1. from September 2020; cited 2021 10.10]. Available from:  
<https://training.cochrane.org/online-learning/core-software-cochrane-reviews/revman>.
25. GRADE: The GRADE Working Group; 2004-2021 [cited 2021 21.10]. Available from:  
<https://www.gradeworkinggroup.org/>
26. Campbell M, McKenzie JE, Sowden A, et al. Synthesis without meta-analysis (SWiM) in systematic reviews: reporting guideline. *BMJ* 2020;368:l6890. doi: 10.1136/bmj.l6890
27. Cao F, Li L, Lin M, et al. Application of instant messaging software in the follow-up of patients using peritoneal dialysis, a randomised controlled trial. *Journal of Clinical Nursing* 2018;27(15-16):3001-07. doi: <https://doi.org/10.1111/jocn.14487>
28. Chaudhuri S, Han H, Muchiutti C, et al. Remote Treatment Monitoring on Hospitalization and Technique Failure Rates in Peritoneal Dialysis Patients. *Kidney360* 2020;1(3):191-202. doi: 10.34067/kid.0000302019
29. Corzo L, Wilkie M, Vesga JI, et al. Technique failure in remote patient monitoring program in patients undergoing automated peritoneal dialysis: A retrospective cohort study. *Perit Dial Int* 2020;896860820982223. doi: 10.1177/0896860820982223 [published Online First: 2021/01/01]
30. Jung HY, Jeon Y, Kim YS, et al. Outcomes of Remote Patient Monitoring for Automated Peritoneal Dialysis: A Randomized Controlled Trial. *Nephron* 2021 doi: 10.1159/000518364
31. Milan Manani S, Baretta M, Giuliani A, et al. Remote monitoring in peritoneal dialysis: benefits on clinical outcomes and on quality of life. *Journal of Nephrology* 2020;33(6):1301-08.
32. Sanabria M, Buitrago G, Lindholm B, et al. Remote Patient Monitoring Program in Automated Peritoneal Dialysis: Impact on Hospitalizations. *Perit Dial Int* 2019;39(5):472-78. doi: 10.3747/pdi.2018.00287 [published Online First: 2019/07/25]
33. Weinhandl ED, Collins AJ. Relative risk of home hemodialysis attrition in patients using a telehealth platform. *Hemodial Int* 2018;22(3):318-27. doi: 10.1111/hdi.12621 [published Online First: 2017/12/07]
34. Wong FK, Chow SK, Chan TM. Evaluation of a nurse-led disease management programme for chronic kidney disease: a randomized controlled trial. *International Journal of Nursing Studies* 2010;47(3):268-78. doi: 10.1016/j.ijnurstu.2009.07.001
35. Kidney Disease Quality of Life Instrument (KDQOL): The RAND Corporation; [cited 2021 14.10]. Available from: [https://www.rand.org/health-care/surveys\\_tools/kdqol.html](https://www.rand.org/health-care/surveys_tools/kdqol.html)

- 1  
2  
3 1 36. Cartwright EJ, Z ZSG, Foo M, et al. eHealth interventions to support patients in delivering  
4 2 and managing peritoneal dialysis at home: A systematic review. *Peritoneal Dialysis*  
5 3 *International* 2021;41(1):32-41.  
6 4  
7 4 37. Stevenson JK, Campbell ZC, Webster AC, et al. eHealth interventions for people with  
8 5 chronic kidney disease. *Cochrane Database of Systematic Reviews* 2019(8) doi:  
9 6 10.1002/14651858.CD012379.pub2  
10 7  
11 7 38. Magnus M, Sikka N, Cherian T, et al. Satisfaction and Improvements in Peritoneal  
12 8 Dialysis Outcomes Associated with Telehealth. *Appl Clin Inform* 2017;8(1):214-25.  
13 9 doi: 10.4338/aci-2016-09-ra-0154 [published Online First: 2017/03/02]  
14 10  
15 10 39. Manera KE, Johnson DW, Craig JC, et al. Patient and Caregiver Priorities for Outcomes  
16 11 in Peritoneal Dialysis. *Multinational Nominal Group Technique Study* 2019;14(1):74-  
17 12 83. doi: 10.2215/cjn.05380518  
18 13  
19 13 40. Evangelidis N, Tong A, Manns B, et al. Developing a Set of Core Outcomes for Trials in  
20 14 Hemodialysis: An International Delphi Survey. *American Journal of Kidney Diseases*  
21 15 2017;70(4):464-75. doi: 10.1053/j.ajkd.2016.11.029  
22 16  
23 16 41. Ariza JG, Walton SM, Sanabria M, et al. Evaluating a remote patient monitoring program  
24 17 for automated peritoneal dialysis. *Perit Dial Int* 2020;40(4):377-83. doi:  
25 18 10.1177/0896860819896880 [published Online First: 2020/02/18]  
26 19  
27 19 42. Sanyal C, Stolee P, Juzwishin D, et al. Economic evaluations of eHealth technologies: A  
28 20 systematic review. *PLoS One* 2018;13(6):e0198112. doi:  
29 21 10.1371/journal.pone.0198112 [published Online First: 2018/06/14]  
30 22  
31 22 43. Gallar P, Vigil A, Rodriguez I, et al. Two-year experience with telemedicine in the  
32 23 follow-up of patients in home peritoneal dialysis. *Journal of Telemedicine & Telecare*  
33 24 2007;13(6):288-92. doi: 10.1258/135763307781644906  
34 25  
35 25 44. SONG. Standardised outcomes in nephrology [cited 2022 23.04]. Available from:  
36 26 <https://songinitiative.org/>  
37 27

35 28 **Figure legend:**

36 29 **Figure 1:** Prisma flow diagram for selection of studies

37 30 **Figure 2:** Metaanalyses of outcomes disease specific hospitalisations and technical failure

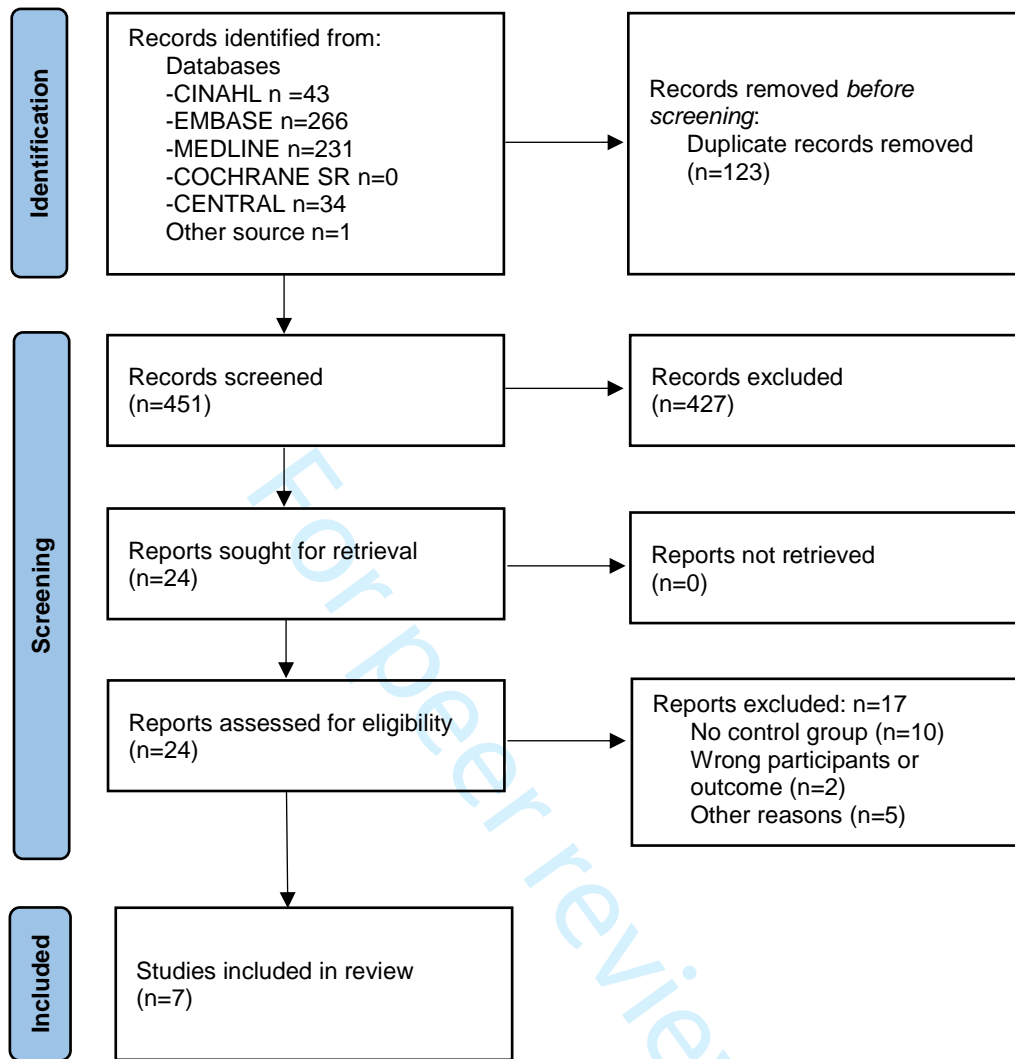

## (a) Disease specific hospitalisations



## (b) Technical failure



**Supplemental Appendix 1: Search strategies**

Date: 23.08.2021

Searches conducted by: Lien Nguyen

Search strategies peer reviewed by: Elisabet Hafstad

| Database                                                         | Number of hits |
|------------------------------------------------------------------|----------------|
| Embase <1974 to 2021 August 20> (OVID)                           | 266            |
| Ovid MEDLINE(R) ALL <1946 to August 20, 2021>                    | 231            |
| Cochrane Library of Systematic Reviews (Cochrane Library; Wiley) | 0              |
| CENTRAL(Cochrane Library; Wiley)                                 | 34             |
| CINAHL (EBSCO)                                                   | 43             |
| Total number of references                                       | 574            |
| Total after duplicate removal                                    | 451            |

**Database: Embase****Search interface: Advanced Search**

- 1 exp telehealth/ 60896
- 2 exp telecommunication/ 87729
- 3 exp health care delivery/ 3564027
- 4 2 and 3 65304
- 5 (telecare\* or teleconsult\* or telefollow\* or telehealth\* or telehome\* or telemanag\* or telemedicine or telemonitor\* or telenurs\* or telepatient\* or telesupport\*).ti,ab,kw,bt. 33953
- 6 ((tele or telemedical\* or tele medical\*) adj (care\* or checkup\* or check up\* or consult\* or followup\* or follow up\* or health\* or home\* or manag\* or medicine\* or monitor\* or nurs\* or patient\* or support\*)).ti,ab,kw,bt. 1853
- 7 (ecare or econsult\* or ehealth or emedicine\* or enurs\* or mcare or mconsult\* or mhealth or mnurse or mcare or mnursing or mconsult\* or mnurs\*).ti,ab,kw,bt. 10706
- 8 ((e or m or mobile or digital) adj (care or consult\* or health\* or nurs\*)).ti,ab,kw,bt. 15428
- 9 (remote adj2 (care\* or checkup\* or check up\* or consult\* or followup\* or follow up\* or health\* or home\* or manag\* or medicine\* or monitor\* or nursing or patient\* or self)).ti,ab,kw,bt. 12293
- 10 1 or 4 or 5 or 6 or 7 or 8 or 9 92070
- 11 hemodialysis/ 115843
- 12 exp peritoneal dialysis/ 44307
- 13 home dialysis/ 2966
- 14 (((dialysis or hemodialysis or haemodialysis) adj4 home?) or peritoneal dialysis).ti,ab,kw,bt. 37655

1  
2  
3 15 (CAPD or APD or HHD).ti. 3524  
4  
5 16 or/11-15 151629  
6  
7 17 10 and 16 534  
8  
9 18 limit 17 to yr=2000-current 516  
10  
11 19 (exp animals/ or exp invertebrate/ or animal experiment/ or animal model/ or animal tissue/  
12 or animal cell/ or nonhuman/) not (human/ or normal human/ or human cell/) 6724645  
13  
14 20 editorial.pt. 699530  
15  
16 21 18 not (19 or 20) 494  
17  
18 22 limit 21 to embase 270  
19  
20 23 remove duplicates from 22 266  
21  
22

23 **Database: OVID MEDLINE**

24 **Search interface: Advanced Search**

25  
26  
27  
28  
29 1 Telemedicine/ 29751  
30  
31 2 Telenursing/ 232  
32  
33 3 Remote Consultation/ 5273  
34  
35 4 or/1-3 34165  
36  
37 5 exp Telecommunications/ 108428  
38  
39 6 (care or healthcare).hw. 1324775  
40  
41 7 5 and 6 19771  
42  
43 8 4 or 7 42042  
44  
45 9 (telecare\* or teleconsult\* or telefollow\* or telehealth\* or telehome\* or telemanag\* or  
46 telemedicine or telemonitor\* or telenurs\* or telepatient\* or telesupport\*).ti,ab,kf,bt. 26067  
47  
48 10 ((tele or telemedical\* or tele medical\*) adj (care\* or checkup\* or check up\* or consult\* or  
49 followup\* or follow up\* or health\* or home\* or manag\* or medicine\* or monitor\* or nurs\*  
50 or patient\* or support\*)).ti,ab,kf,bt. 1020  
51  
52 11 (ecare or econsult\* or ehealth or emedicine\* or enurs\* or mcare or mconsult\* or mhealth or  
53 mnurse or mcare or mnursing or mconsult\* or mnurs\*).ti,ab,kf,bt. 10618  
54  
55 12 ((e or m or mobile or digital) adj (care or consult\* or health\* or nurs\*)).ti,ab,kf,bt. 13372  
56  
57 13 (remote adj2 (care\* or checkup\* or check up\* or consult\* or followup\* or follow up\* or  
58 health\* or home\* or manag\* or medicine\* or monitor\* or nursing or patient\* or  
59 self)).ti,ab,kf,bt. 8231  
60  
61 14 or/8-13 69186

1  
2  
3 15 Renal Dialysis/ 94819  
4  
5 16 Hemodialysis, Home/ 2013  
6  
7 17 exp Peritoneal Dialysis/ 26840  
8  
9 18 (((dialysis or hemodialysis or haemodialysis) adj4 home?) or peritoneal dialysis).ti,ab,kf,bt.  
10 28202  
11  
12 19 (CAPD or APD or HHD).ti. 2685  
13  
14 20 or/15-19 121750  
15  
16 21 14 and 20 271  
17  
18 22 limit 21 to yr=2000-current 243  
19  
20 23 exp animals/ not humans/ 4877030  
21  
22 24 (news or editorial or comment).pt. 1512750  
23  
24 25 22 not (23 or 24) 231  
25  
26 26 remove duplicates from 25 231

27  
28  
29 **Database: Cochrane Database of Systematic Review & CENTRAL**

30 **Search interface: Advanced Search > Search Manager**

31  
32  
33  
34 ID Search Hits  
35  
36 #1 [mh ^telemedicine] 2414  
37  
38 #2 [mh ^telenursing] 31  
39  
40 #3 [mh ^"remote consultation"] 381  
41  
42 #4 #1 or #2 or #3 2777  
43  
44 #5 [mh telecommunications] 7362  
45  
46 #6 [mh ^"delivery of health care"] 806  
47  
48 #7 [mh ^"health services"] 458  
49  
50 #8 #5 and (#6 or #7) 139  
51  
52 #9 #4 or #8 2838  
53  
54 #10 (telecare\* or teleconsult\* or telefollow\* or telehealth\* or telehome\* or telemanag\* or  
55 telemedicine or telemonitor\* or telenurs\* or telepatient\* or telesupport\*):ti,ab,kw 7370  
56  
57 #11 ((tele or telemedical\* or tele-medical\*) NEXT (care\* or checkup\* or check-up\* or consult\* or  
58 followup\* or follow-up\* or health\* or home\* or manag\* or medicine\* or monitor\* or nurs\*  
59 or patient\* or support\*)):ti,ab,kw 446  
60



- 1  
2  
3 #12 (ecare or econsult\* or ehealth or emedicine\* or enurs\* or mcare or mconsult\* or mhealth or  
4 mnurse or mcare or mnursing or mconsult\* or mnurs\*):ti,ab,kw 2547  
5  
6 #13 ((e or m or mobile or digital) NEXT (care or consult\* or health\* or nurs\*)):ti,ab,kw 3725  
7  
8 #14 (remote NEAR/2 (care\* or checkup\* or check-up\* or consult\* or followup\* or follow-up\* or  
9 health\* or home\* or manag\* or medicine\* or monitor\* or nursing or patient\* or  
10 self)):ti,ab,kw 1743  
11  
12 #15 {or #9-#14} 11340  
13  
14 #16 [mh ^"Renal Dialysis"] 4322  
15  
16 #17 [mh ^"hemodialysis, home"] 43  
17  
18 #18 [mh "Peritoneal Dialysis"] 900  
19  
20 #19 (((dialysis or hemodialysis or haemodialysis) NEAR/4 home?) or "peritoneal dialysis"):ti,ab,kw  
21 2491  
22  
23 #20 (CAPD or APD or HHD):ti 409  
24  
25 #21 {or #16-#20} 6775  
26  
27 #22 #15 and #21 with Cochrane Library publication date Between Jan 2000 and Aug 2021, in  
28 Cochrane Reviews 0  
29  
30 #23 #15 and #21 with Publication Year from 2000 to 2021, in Trials 34  
31  
32  
33  
34  
35  
36  
37  
38  
39  
40  
41  
42  
43  
44  
45  
46  
47  
48  
49  
50  
51  
52  
53  
54  
55  
56  
57  
58  
59  
60

**Database: CINAHL**

**Search interface: Advanced Search**

## Supplemental Appendix 2: Excluded studies read in full text

| Excluded studies read in full text (n=17)                                                                                                                                                                                                                                                                                                                                                                                                                          | Justifications for exclusion                                       |
|--------------------------------------------------------------------------------------------------------------------------------------------------------------------------------------------------------------------------------------------------------------------------------------------------------------------------------------------------------------------------------------------------------------------------------------------------------------------|--------------------------------------------------------------------|
| Dey V, Jones A, Spalding EM. Telehealth: Acceptability, clinical interventions and quality of life in peritoneal dialysis. SAGE Open Med. 2016;4:2050312116670188.                                                                                                                                                                                                                                                                                                 | No control group                                                   |
| El Shamy O, Tran H, Sharma S, Ronco C, Narayanan M, Uribarri J, et al. Telenephrology with Remote Peritoneal Dialysis Monitoring during Coronavirus Disease 19. Karger AG; 2020. p. 480-2.                                                                                                                                                                                                                                                                         | Letter about Covid-19 and the impact in kidney care/review         |
| Harnett P, Jones M, Almond M, Ballasubramaniam G, Kunnath V. A virtual clinic to improve long-term outcomes in chronic kidney disease. Clinical Medicine, Journal of the Royal College of Physicians of London. 2018;18(5):356-63.                                                                                                                                                                                                                                 | Not home dialysis patients                                         |
| Huang R, Liu N, Nicdao MA, Mikaheal M, Baldacchino T, Albeos A, et al. Emotion sharing in remote patient monitoring of patients with chronic kidney disease. J Am Med Inform Assoc. 2020;27(2):185-93.                                                                                                                                                                                                                                                             | No control group and wrong outcome                                 |
| Kiberd J, Khan U, Stockman C, Radhakrishnan A, Phillips M, Kiberd BA, et al. Effectiveness of a Web-Based eHealth Portal for Delivery of Care to Home Dialysis Patients: A Single-Arm Pilot Study. Can J Kidney Health Dis. 2018;5:2054358118794415.                                                                                                                                                                                                               | No control group                                                   |
| Milan Manani S, Crepaldi C, Giuliani A, Virzi GM, Garzotto F, Riello C, et al. Remote Monitoring of Automated Peritoneal Dialysis Improves Personalization of Dialytic Prescription and Patient's Independence. Blood Purification. 2018;46(2):111-7.                                                                                                                                                                                                              | No control group                                                   |
| Milan Manani S, Rosner MH, Virzi GM, Giuliani A, Berti S, Crepaldi C, et al. Longitudinal Experience with Remote Monitoring for Automated Peritoneal Dialysis Patients. Nephron. 2019;142(1):1-9.                                                                                                                                                                                                                                                                  | No control group                                                   |
| Musso CG, Plazzotta F, Otero C, Aguilera J, Campos F, Diez GR, et al. Informatic nephrology: 17 years of one-center experience. International Urology and Nephrology. 2015;47(9):1587-8.                                                                                                                                                                                                                                                                           | Letter (not empirical study)                                       |
| Nayak KS, Ronco C, Karopadi AN, Rosner MH. Telemedicine and Remote Monitoring: Supporting the Patient on Peritoneal Dialysis. Perit Dial Int. 2016;36(4):362-6.                                                                                                                                                                                                                                                                                                    | No control group: summary from three different studies             |
| Patterson P. Telehealth for Home Dialysis Therapies. Nephrol Nurs J. 2017;44(6):545-8.                                                                                                                                                                                                                                                                                                                                                                             | An interview with a doctor                                         |
| Polanco E, Aquey M, Collado J, Campos E, Guzman J, Cuevas-Budhart MA, et al. A COVID-19 pandemic-specific, structured care process for Peritoneal Dialysis patients facilitated by Telemedicine: therapy continuity, prevention and complications management. Therapeutic apheresis and dialysis : official peer-reviewed journal of the International Society for Apheresis, the Japanese Society for Apheresis, the Japanese Society for Dialysis Therapy. 2021. | No control group                                                   |
| Ronco C, Manani SM, Giuliani A, Tantillo I, Reis T, Brown EA. Remote patient management of peritoneal dialysis during COVID-19 pandemic. Perit Dial Int. 2020;40(4):363-7.                                                                                                                                                                                                                                                                                         | Review                                                             |
| Scarpioni R, Manini A, Chiappini P. Remote patient monitoring in peritoneal dialysis helps reduce risk of hospitalization during Covid-19 pandemic. J Nephrol. 2020;33(6):1123-4.                                                                                                                                                                                                                                                                                  | There are patients with RPM and without, but they are not compared |
| Tangaro S, Fanizzi A, Amoroso N, Corciulo R, Garuccio E, Gesualdo L, et al. Computer aided detection system for prediction of the malaise during hemodialysis. Computational and Mathematical Methods in Medicine. 2016;2016 (no pagination).                                                                                                                                                                                                                      | No control group without TM                                        |
| Viglino G, Neri L, Barbieri S, Tortone C. Videodialysis: a pilot experience of telecare for assisted peritoneal dialysis. J Nephrol. 2020;33(1):177-82.                                                                                                                                                                                                                                                                                                            | No relevant outcomes                                               |
| Wood E, McCarthy K, Roper M. Remote monitoring of peritoneal dialysis: evaluating the impact of the Claria Sharesource system. Journal of Kidney Care. 2019;4(1):16-24.                                                                                                                                                                                                                                                                                            | No control group                                                   |

1  
2  
3  
4  
5  
6  
7  
8  
9  
10  
11  
12  
13  
14  
15  
16  
17  
18  
19  
20  
21  
22  
23  
24  
25  
26  
27  
28  
29  
30  
31  
32  
33  
34  
35  
36  
37  
38  
39  
40  
41  
42  
43  
44  
45  
46  
47  
48  
49  
50  
51  
52  
53  
54  
55  
56  
57  
58  
59  
60

|                                                                                                                                                                                                       |                                |
|-------------------------------------------------------------------------------------------------------------------------------------------------------------------------------------------------------|--------------------------------|
| Yeter HH, Karacalik C, Eraslan E, Akcay OF, Derici U, Ronco C. Effect of remote patient management in peritoneal dialysis on haemodynamic and volume control. <i>Nephrology</i> . 2020;25(11):856-64. | No pre-intervention assessment |
|-------------------------------------------------------------------------------------------------------------------------------------------------------------------------------------------------------|--------------------------------|

For peer review only

**Supplemental Appendix 3:** Description of the studies' risk of bias, variables adjusted for in the analyses and sources of funding

**Risk of bias for the RCTs**

|           | Random sequence generation (selection bias) | Allocation concealment (selection bias) | Blinding of participants and personnel (performance bias) | Blinding of outcome assessment (detection bias) | Incomplete outcome data (attrition bias) | Selective reporting (reporting bias) | Other bias |
|-----------|---------------------------------------------|-----------------------------------------|-----------------------------------------------------------|-------------------------------------------------|------------------------------------------|--------------------------------------|------------|
| Cao 2018  | +                                           | ?                                       | ?                                                         | ?                                               | +                                        | ?                                    | +          |
| Jung 2021 | +                                           | ?                                       | -                                                         | -                                               | +                                        | +                                    | +          |

**Risk of bias for the retrospective cohort studies**

| Study                 | Selection |     |     |    | Comparability | Outcome |     |     | Stars:<br>Quality |
|-----------------------|-----------|-----|-----|----|---------------|---------|-----|-----|-------------------|
|                       | 1         | 2   | 3   | 4  |               | 1       | 2   | 3   |                   |
| <b>Chaudhuri 2020</b> | 1b*       | 2a* | 3a* | 4b | 1ab**         | 1b*     | 2a* | 3d  | 7: Good           |
| <b>Corzo 2020</b>     | 1b*       | 2a* | 3a* | 4b | 1ab**         | 1b*     | 2a* | 3b* | 9: Good           |
| <b>Milan 2020</b>     | 1c        | 2a* | 3a* | 4b | 1-            | 1b*     | 2a* | 3b* | 6: Fair           |
| <b>Sanabrina 2019</b> | 1b*       | 2a* | 3a* | 4b | 1ab           | 1b*     | 2a* | 3b* | 9: Good           |
| <b>Weinhandl 2018</b> | 1b*       | 2a* | 3a* | 4b | 1ab**         | 1b*     | 2a* | 3d  | 7: Good           |

### Variables adjusted for in the analyses

|                       | <b>Hospitalisations</b>                                                                                                                                                  | <b>Technical failure</b>                                                                                             | <b>QoL</b>                                  |
|-----------------------|--------------------------------------------------------------------------------------------------------------------------------------------------------------------------|----------------------------------------------------------------------------------------------------------------------|---------------------------------------------|
| <b>Chaudhuri 2020</b> | User group, Age, Gender, Race/ethnicity, Comorbidity, Laboratory measures, Education, Alcohol dependency, Urbanicity                                                     | User group, Age, Gender, Race/ethnicity, Comorbidity, Laboratory measures, Education, Alcohol dependency, Urbanicity |                                             |
| <b>Corzo 2020</b>     |                                                                                                                                                                          | Death, Kidney transplant                                                                                             |                                             |
| <b>Jung 2021</b>      |                                                                                                                                                                          |                                                                                                                      | Age, Diabetes, Serum albumin concentrations |
| <b>Sanabria 2019</b>  | Age, Gender, Education, CKD cause, Comorbidity index, Hemoglobin, Albumin, Phosphorus, Diuresis, Peritoneal equilibration test %, City, Follow-up time, Cause of censure |                                                                                                                      |                                             |
| <b>Weinhandl 2018</b> |                                                                                                                                                                          | Age, Sex, Race, Vascular access modality                                                                             |                                             |

### Sources of funding

**Cao 2018:** *“This project is supported by the 2014 Appropriate Technology Promotion Funding Plan for primary organizations and cities by the Fujian Provincial Health and Family Planning Commission and key Clinical Specialty Discipline Construction Program of Fujian, P.R.C.”*

**Jung 2021:** *“This research was supported by a grant from the Korea Health Technology R&D Project through the Korea Health Industry Development Institute, funded by the Ministry of Health & Welfare, Republic of Korea (HC15C1129). The sponsor of this study had no role in the study design collection, data management, data analysis, interpretation of data, writing of the report, and the decision to submit the report for publication”*

**Chaudhuri 2020:** *“Analysis was supported by Fresenius Medical Care”*

**Corzo 2020:** *“This work was funded by Renal Therapy Services, Colombia”*

**Milan 2020:** *“The authors did not use funding sources”*

**Sanabria 2019:** *“The study was supported by Baxter Renal Care Services Colombia, an independent entity owned by Baxter International, Inc. Funding to support the preparation of this manuscript was provided by Baxter Healthcare Corporation, Deerfield, Illinois. Baxter Healthcare Corporation participated in reviewing the manuscript for scientific accuracy”*

1  
2  
3 **Weinhandl 2018:** *“Conflict of Interest: Dr Weinhandl and Dr Collins are both employees of*  
4 *NxStage Medical. Disclosure of grants or other funding: The authors are solely responsible*  
5 *for the design of the study and the content of the manuscript. The content of the manuscript*  
6 *was reviewed by other NxStage Medical employees only for the verification of compliance*  
7 *with product labeling.”*  
8  
9  
10  
11  
12  
13  
14  
15  
16  
17  
18  
19  
20  
21  
22  
23  
24  
25  
26  
27  
28  
29  
30  
31  
32  
33  
34  
35  
36  
37  
38  
39  
40  
41  
42  
43  
44  
45  
46  
47  
48  
49  
50  
51  
52  
53  
54  
55  
56  
57  
58  
59  
60

For peer review only



## PRISMA 2020 Checklist

| Section and Topic             | Item # | Checklist item                                                                                                                                                                                                                                                                                       | Location where item is reported |
|-------------------------------|--------|------------------------------------------------------------------------------------------------------------------------------------------------------------------------------------------------------------------------------------------------------------------------------------------------------|---------------------------------|
| <b>TITLE</b>                  |        |                                                                                                                                                                                                                                                                                                      |                                 |
| Title                         | 1      | Identify the report as a systematic review.                                                                                                                                                                                                                                                          | p. 1                            |
| <b>ABSTRACT</b>               |        |                                                                                                                                                                                                                                                                                                      |                                 |
| Abstract                      | 2      | See the PRISMA 2020 for Abstracts checklist.                                                                                                                                                                                                                                                         | p. 2                            |
| <b>INTRODUCTION</b>           |        |                                                                                                                                                                                                                                                                                                      |                                 |
| Rationale                     | 3      | Describe the rationale for the review in the context of existing knowledge.                                                                                                                                                                                                                          | p. 3-4                          |
| Objectives                    | 4      | Provide an explicit statement of the objective(s) or question(s) the review addresses.                                                                                                                                                                                                               | p. 4                            |
| <b>METHODS</b>                |        |                                                                                                                                                                                                                                                                                                      |                                 |
| Eligibility criteria          | 5      | Specify the inclusion and exclusion criteria for the review and how studies were grouped for the syntheses.                                                                                                                                                                                          | p. 4-6                          |
| Information sources           | 6      | Specify all databases, registers, websites, organisations, reference lists and other sources searched or consulted to identify studies. Specify the date when each source was last searched or consulted.                                                                                            | p. 4 & supplement file 1        |
| Search strategy               | 7      | Present the full search strategies for all databases, registers and websites, including any filters and limits used.                                                                                                                                                                                 | Supplement file 1               |
| Selection process             | 8      | Specify the methods used to decide whether a study met the inclusion criteria of the review, including how many reviewers screened each record and each report retrieved, whether they worked independently, and if applicable, details of automation tools used in the process.                     | p. 5                            |
| Data collection process       | 9      | Specify the methods used to collect data from reports, including how many reviewers collected data from each report, whether they worked independently, any processes for obtaining or confirming data from study investigators, and if applicable, details of automation tools used in the process. | p. 6                            |
| Data items                    | 10a    | List and define all outcomes for which data were sought. Specify whether all results that were compatible with each outcome domain in each study were sought (e.g. for all measures, time points, analyses), and if not, the methods used to decide which results to collect.                        | p. 5-6                          |
|                               | 10b    | List and define all other variables for which data were sought (e.g. participant and intervention characteristics, funding sources). Describe any assumptions made about any missing or unclear information.                                                                                         | p. 6                            |
| Study risk of bias assessment | 11     | Specify the methods used to assess risk of bias in the included studies, including details of the tool(s) used, how many reviewers assessed each study and whether they worked independently, and if applicable, details of automation tools used in the process.                                    | p. 5-6                          |
| Effect measures               | 12     | Specify for each outcome the effect measure(s) (e.g. risk ratio, mean difference) used in the synthesis or presentation of results.                                                                                                                                                                  | p. 6                            |
| Synthesis methods             | 13a    | Describe the processes used to decide which studies were eligible for each synthesis (e.g. tabulating the study intervention characteristics and comparing against the planned groups for each synthesis (item #5)).                                                                                 | p. 6                            |
|                               | 13b    | Describe any methods required to prepare the data for presentation or synthesis, such as handling of missing summary statistics, or data conversions.                                                                                                                                                | NA                              |
|                               | 13c    | Describe any methods used to tabulate or visually display results of individual studies and syntheses.                                                                                                                                                                                               | p. 6                            |
|                               | 13d    | Describe any methods used to synthesize results and provide a rationale for the choice(s). If meta-analysis was performed, describe the model(s), method(s) to identify the presence and extent of statistical heterogeneity, and software package(s) used.                                          | p. 6                            |
|                               | 13e    | Describe any methods used to explore possible causes of heterogeneity among study results (e.g. subgroup analysis, meta-regression).                                                                                                                                                                 | NA                              |
|                               | 13f    | Describe any sensitivity analyses conducted to assess robustness of the synthesized results.                                                                                                                                                                                                         | NA                              |
| Reporting bias assessment     | 14     | Describe any methods used to assess risk of bias due to missing results in a synthesis (arising from reporting biases).                                                                                                                                                                              | NA                              |

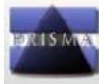

## PRISMA 2020 Checklist

| Section and Topic                              | Item # | Checklist item                                                                                                                                                                                                                                                                       | Location where item is reported |
|------------------------------------------------|--------|--------------------------------------------------------------------------------------------------------------------------------------------------------------------------------------------------------------------------------------------------------------------------------------|---------------------------------|
| Certainty assessment                           | 15     | Describe any methods used to assess certainty (or confidence) in the body of evidence for an outcome.                                                                                                                                                                                | p. 6                            |
| <b>RESULTS</b>                                 |        |                                                                                                                                                                                                                                                                                      |                                 |
| Study selection                                | 16a    | Describe the results of the search and selection process, from the number of records identified in the search to the number of studies included in the review, ideally using a flow diagram.                                                                                         | Figure 1 & p. 7                 |
|                                                | 16b    | Cite studies that might appear to meet the inclusion criteria, but which were excluded, and explain why they were excluded.                                                                                                                                                          | p. 7                            |
| Study characteristics                          | 17     | Cite each included study and present its characteristics.                                                                                                                                                                                                                            | Table 1 & p. 7                  |
| Risk of bias in studies                        | 18     | Present assessments of risk of bias for each included study.                                                                                                                                                                                                                         | Supplement file 2               |
| Results of individual studies                  | 19     | For all outcomes, present, for each study: (a) summary statistics for each group (where appropriate) and (b) an effect estimate and its precision (e.g. confidence/credible interval), ideally using structured tables or plots.                                                     | Figure 2 & table 2              |
| Results of syntheses                           | 20a    | For each synthesis, briefly summarise the characteristics and risk of bias among contributing studies.                                                                                                                                                                               | p. 9                            |
|                                                | 20b    | Present results of all statistical syntheses conducted. If meta-analysis was done, present for each the summary estimate and its precision (e.g. confidence/credible interval) and measures of statistical heterogeneity. If comparing groups, describe the direction of the effect. | p. 9 & Figure 2                 |
|                                                | 20c    | Present results of all investigations of possible causes of heterogeneity among study results.                                                                                                                                                                                       | NA                              |
|                                                | 20d    | Present results of all sensitivity analyses conducted to assess the robustness of the synthesized results.                                                                                                                                                                           | NA                              |
| Reporting biases                               | 21     | Present assessments of risk of bias due to missing results (arising from reporting biases) for each synthesis assessed.                                                                                                                                                              | NA                              |
| Certainty of evidence                          | 22     | Present assessments of certainty (or confidence) in the body of evidence for each outcome assessed.                                                                                                                                                                                  | Table 3                         |
| <b>DISCUSSION</b>                              |        |                                                                                                                                                                                                                                                                                      |                                 |
| Discussion                                     | 23a    | Provide a general interpretation of the results in the context of other evidence.                                                                                                                                                                                                    | p. 10-11                        |
|                                                | 23b    | Discuss any limitations of the evidence included in the review.                                                                                                                                                                                                                      | p. 11-12                        |
|                                                | 23c    | Discuss any limitations of the review processes used.                                                                                                                                                                                                                                | p. 11-12                        |
|                                                | 23d    | Discuss implications of the results for practice, policy, and future research.                                                                                                                                                                                                       | p. 11                           |
| <b>OTHER INFORMATION</b>                       |        |                                                                                                                                                                                                                                                                                      |                                 |
| Registration and protocol                      | 24a    | Provide registration information for the review, including register name and registration number, or state that the review was not registered.                                                                                                                                       | p. 2 & 4                        |
|                                                | 24b    | Indicate where the review protocol can be accessed, or state that a protocol was not prepared.                                                                                                                                                                                       | p. 2 & 4                        |
|                                                | 24c    | Describe and explain any amendments to information provided at registration or in the protocol.                                                                                                                                                                                      | p. 6                            |
| Support                                        | 25     | Describe sources of financial or non-financial support for the review, and the role of the funders or sponsors in the review.                                                                                                                                                        | No support for review           |
| Competing interests                            | 26     | Declare any competing interests of review authors.                                                                                                                                                                                                                                   | No conflicts to declare         |
| Availability of data, code and other materials | 27     | Report which of the following are publicly available and where they can be found: template data collection forms; data extracted from included studies; data used for all analyses; analytic code; any other materials used in the review.                                           | Available on request            |





# PRISMA 2020 Checklist

- 1
- 2
- 3
- 4
- 5
- 6
- 7
- 8
- 9
- 10
- 11
- 12
- 13
- 14
- 15
- 16
- 17
- 18
- 19
- 20
- 21
- 22
- 23
- 24
- 25
- 26
- 27
- 28
- 29
- 30
- 31
- 32
- 33
- 34
- 35
- 36
- 37
- 38
- 39
- 40
- 41
- 42
- 43
- 44
- 45
- 46
- 47

From: Page MJ, McKenzie JE, Bossuyt PM, Boutron I, Hoffmann TC, Mulrow CD, et al. The PRISMA 2020 statement: an updated guideline for reporting systematic reviews. *BMJ* 2021;372:n71. doi: 10.1136/bmj.n71  
 For more information, visit: <http://www.prisma-statement.org/>

For peer review only
