# Supplementary material for: Effect of remote patient monitoring for patients with chronic kidney disease who perform dialysis at home: a systematic review
Source: PubMed Central journal article supplement — BMJ Open. 2022 Dec 7;12(12):e061772. doi: 10.1136/bmjopen-2022-061772 (PMC9730362; doi:10.1136/bmjopen-2022-061772), 2022-12-07
Supplement: bmjopen-2022-061772supp001.pdf [file bmjopen-2022-061772supp001.pdf]

**Supplemental Appendix 1: Search strategies**

Date: 23.08.2021

Searches conducted by: Lien Nguyen

Search strategies peer reviewed by: Elisabet Hafstad

| Database                                                         | Number of hits |
|------------------------------------------------------------------|----------------|
| Embase <1974 to 2021 August 20> (OVID)                           | 266            |
| Ovid MEDLINE(R) ALL <1946 to August 20, 2021>                    | 231            |
| Cochrane Library of Systematic Reviews (Cochrane Library; Wiley) | 0              |
| CENTRAL(Cochrane Library; Wiley)                                 | 34             |
| CINAHL (EBSCO)                                                   | 43             |
|                                                                  |                |
| Total number of references                                       | 574            |
| Total after duplicate removal                                    | 451            |

**Database: Embase****Search interface: Advanced Search**

- 1 exp telehealth/ 60896
- 2 exp telecommunication/ 87729
- 3 exp health care delivery/ 3564027
- 4 2 and 3 65304
- 5 (telecare\* or teleconsult\* or telefollow\* or telehealth\* or telehome\* or telemanag\* or telemedicine or telemonitor\* or telenurs\* or telepatient\* or telesupport\*).ti,ab,kw,bt. 33953
- 6 ((tele or telemedical\* or tele medical\*) adj (care\* or checkup\* or check up\* or consult\* or followup\* or follow up\* or health\* or home\* or manag\* or medicine\* or monitor\* or nurs\* or patient\* or support\*)).ti,ab,kw,bt. 1853
- 7 (ecare or econsult\* or ehealth or emedicine\* or enurs\* or mcare or mconsult\* or mhealth or mnurse or mcare or mnursing or mconsult\* or mnurs\*).ti,ab,kw,bt. 10706
- 8 ((e or m or mobile or digital) adj (care or consult\* or health\* or nurs\*)).ti,ab,kw,bt. 15428
- 9 (remote adj2 (care\* or checkup\* or check up\* or consult\* or followup\* or follow up\* or health\* or home\* or manag\* or medicine\* or monitor\* or nursing or patient\* or self)).ti,ab,kw,bt. 12293
- 10 1 or 4 or 5 or 6 or 7 or 8 or 9 92070
- 11 hemodialysis/ 115843
- 12 exp peritoneal dialysis/ 44307
- 13 home dialysis/ 2966
- 14 (((dialysis or hemodialysis or haemodialysis) adj4 home?) or peritoneal dialysis).ti,ab,kw,bt. 37655

|    |                                                                                                                                                                        |         |
|----|------------------------------------------------------------------------------------------------------------------------------------------------------------------------|---------|
| 15 | (CAPD or APD or HHD).ti.                                                                                                                                               | 3524    |
| 16 | or/11-15                                                                                                                                                               | 151629  |
| 17 | 10 and 16                                                                                                                                                              | 534     |
| 18 | limit 17 to yr=2000-current                                                                                                                                            | 516     |
| 19 | (exp animals/ or exp invertebrate/ or animal experiment/ or animal model/ or animal tissue/ or animal cell/ or nonhuman/) not (human/ or normal human/ or human cell/) | 6724645 |
| 20 | editorial.pt.                                                                                                                                                          | 699530  |
| 21 | 18 not (19 or 20)                                                                                                                                                      | 494     |
| 22 | limit 21 to embase                                                                                                                                                     | 270     |
| 23 | remove duplicates from 22                                                                                                                                              | 266     |

**Database: OVID MEDLINE****Search interface: Advanced Search**

|    |                                                                                                                                                                                                                            |         |
|----|----------------------------------------------------------------------------------------------------------------------------------------------------------------------------------------------------------------------------|---------|
| 1  | Telemedicine/                                                                                                                                                                                                              | 29751   |
| 2  | Telenursing/                                                                                                                                                                                                               | 232     |
| 3  | Remote Consultation/                                                                                                                                                                                                       | 5273    |
| 4  | or/1-3                                                                                                                                                                                                                     | 34165   |
| 5  | exp Telecommunications/                                                                                                                                                                                                    | 108428  |
| 6  | (care or healthcare).hw.                                                                                                                                                                                                   | 1324775 |
| 7  | 5 and 6                                                                                                                                                                                                                    | 19771   |
| 8  | 4 or 7                                                                                                                                                                                                                     | 42042   |
| 9  | (telecare* or teleconsult* or telefollow* or telehealth* or telehome* or telemanag* or telemedicine or telemonitor* or telenurs* or telepatient* or telesupport*).ti,ab,kf,bt.                                             | 26067   |
| 10 | ((tele or telemedical* or tele medical*) adj (care* or checkup* or check up* or consult* or followup* or follow up* or health* or home* or manag* or medicine* or monitor* or nurs* or patient* or support*)).ti,ab,kf,bt. | 1020    |
| 11 | (ecare or econsult* or ehealth or emedicine* or enurs* or mcare or mconsult* or mhealth or mnurse or mcare or mnursing or mconsult* or mnurs*).ti,ab,kf,bt.                                                                | 10618   |
| 12 | ((e or m or mobile or digital) adj (care or consult* or health* or nurs*)).ti,ab,kf,bt.                                                                                                                                    | 13372   |
| 13 | (remote adj2 (care* or checkup* or check up* or consult* or followup* or follow up* or health* or home* or manag* or medicine* or monitor* or nursing or patient* or self)).ti,ab,kf,bt.                                   | 8231    |
| 14 | or/8-13                                                                                                                                                                                                                    | 69186   |

|    |                                                                                               |         |  |
|----|-----------------------------------------------------------------------------------------------|---------|--|
| 15 | Renal Dialysis/                                                                               | 94819   |  |
| 16 | Hemodialysis, Home/                                                                           | 2013    |  |
| 17 | exp Peritoneal Dialysis/                                                                      | 26840   |  |
| 18 | ((dialysis or hemodialysis or haemodialysis) adj4 home?) or peritoneal dialysis).ti,ab,kf,bt. | 28202   |  |
| 19 | (CAPD or APD or HHD).ti.                                                                      | 2685    |  |
| 20 | or/15-19                                                                                      | 121750  |  |
| 21 | 14 and 20                                                                                     | 271     |  |
| 22 | limit 21 to yr=2000-current                                                                   | 243     |  |
| 23 | exp animals/ not humans/                                                                      | 4877030 |  |
| 24 | (news or editorial or comment).pt.                                                            | 1512750 |  |
| 25 | 22 not (23 or 24)                                                                             | 231     |  |
| 26 | remove duplicates from 25                                                                     | 231     |  |

#### Database: Cochrane Database of Systematic Review & CENTRAL

#### Search interface: Advanced Search > Search Manager

| ID  | Search Hits                                                                                                                                                                                                             |      |
|-----|-------------------------------------------------------------------------------------------------------------------------------------------------------------------------------------------------------------------------|------|
| #1  | [mh ^telemedicine]                                                                                                                                                                                                      | 2414 |
| #2  | [mh ^telenursing]                                                                                                                                                                                                       | 31   |
| #3  | [mh ^"remote consultation"]                                                                                                                                                                                             | 381  |
| #4  | #1 or #2 or #3                                                                                                                                                                                                          | 2777 |
| #5  | [mh telecommunications]                                                                                                                                                                                                 | 7362 |
| #6  | [mh ^"delivery of health care"]                                                                                                                                                                                         | 806  |
| #7  | [mh ^"health services"]                                                                                                                                                                                                 | 458  |
| #8  | #5 and (#6 or #7)                                                                                                                                                                                                       | 139  |
| #9  | #4 or #8                                                                                                                                                                                                                | 2838 |
| #10 | (telecare* or teleconsult* or telefollow* or telehealth* or telehome* or telemanag* or telemedicine or telemonitor* or telenurs* or telepatient* or telesupport*):ti,ab,kw                                              | 7370 |
| #11 | ((tele or telemedical* or tele-medical*) NEXT (care* or checkup* or check-up* or consult* or followup* or follow-up* or health* or home* or manag* or medicine* or monitor* or nurs* or patient* or support*)):ti,ab,kw | 446  |

- #12 (ecare or econsult\* or ehealth or emedicine\* or enurs\* or mcare or mconsult\* or mhealth or mnurse or mcare or mnursing or mconsult\* or mnurs\*):ti,ab,kw 2547
- #13 ((e or m or mobile or digital) NEXT (care or consult\* or health\* or nurs\*)):ti,ab,kw 3725
- #14 (remote NEAR/2 (care\* or checkup\* or check-up\* or consult\* or followup\* or follow-up\* or health\* or home\* or manag\* or medicine\* or monitor\* or nursing or patient\* or self)):ti,ab,kw 1743
- #15 {or #9-#14} 11340
- #16 [mh ^"Renal Dialysis"] 4322
- #17 [mh ^"hemodialysis, home"] 43
- #18 [mh "Peritoneal Dialysis"] 900
- #19 (((dialysis or hemodialysis or haemodialysis) NEAR/4 home?) or "peritoneal dialysis"):ti,ab,kw 2491
- #20 (CAPD or APD or HHD):ti 409
- #21 {or #16-#20} 6775
- #22 #15 and #21 with Cochrane Library publication date Between Jan 2000 and Aug 2021, in Cochrane Reviews 0
- #23 #15 and #21 with Publication Year from 2000 to 2021, in Trials 34

**Database: CINAHL**

**Search interface: Advanced Search**
