# Supplementary material for: Effect of remote patient monitoring for patients with chronic kidney disease who perform dialysis at home: a systematic review
Source: PubMed Central journal article supplement — BMJ Open. 2022 Dec 7;12(12):e061772. doi: 10.1136/bmjopen-2022-061772 (PMC9730362; doi:10.1136/bmjopen-2022-061772), 2022-12-07
Supplement: bmjopen-2022-061772supp002.pdf [file bmjopen-2022-061772supp002.pdf]

**Supplemental Appendix 2: Excluded studies read in full text**

| Excluded studies read in full text (n=17)                                                                                                                                                                                                                                                                                                                                                                                                                                 | Justifications for exclusion                                       |
|---------------------------------------------------------------------------------------------------------------------------------------------------------------------------------------------------------------------------------------------------------------------------------------------------------------------------------------------------------------------------------------------------------------------------------------------------------------------------|--------------------------------------------------------------------|
| Dey V, Jones A, Spalding EM. Telehealth: Acceptability, clinical interventions and quality of life in peritoneal dialysis. <i>SAGE Open Med.</i> 2016;4:2050312116670188.                                                                                                                                                                                                                                                                                                 | No control group                                                   |
| El Shamy O, Tran H, Sharma S, Ronco C, Narayanan M, Uribarri J, et al. Teleneurology with Remote Peritoneal Dialysis Monitoring during Coronavirus Disease 19. <i>Karger AG</i> ; 2020. p. 480-2.                                                                                                                                                                                                                                                                         | Letter about Covid-19 and the impact in kidney care/review         |
| Harnett P, Jones M, Almond M, Ballasubramaniam G, Kunnath V. A virtual clinic to improve long-term outcomes in chronic kidney disease. <i>Clinical Medicine, Journal of the Royal College of Physicians of London.</i> 2018;18(5):356-63.                                                                                                                                                                                                                                 | Not home dialysis patients                                         |
| Huang R, Liu N, Nicdao MA, Mikaheal M, Baldacchino T, Albeos A, et al. Emotion sharing in remote patient monitoring of patients with chronic kidney disease. <i>J Am Med Inform Assoc.</i> 2020;27(2):185-93.                                                                                                                                                                                                                                                             | No control group and wrong outcome                                 |
| Kiberd J, Khan U, Stockman C, Radhakrishnan A, Phillips M, Kiberd BA, et al. Effectiveness of a Web-Based eHealth Portal for Delivery of Care to Home Dialysis Patients: A Single-Arm Pilot Study. <i>Can J Kidney Health Dis.</i> 2018;5:2054358118794415.                                                                                                                                                                                                               | No control group                                                   |
| Milan Manani S, Crepaldi C, Giuliani A, Virzi GM, Garzotto F, Riello C, et al. Remote Monitoring of Automated Peritoneal Dialysis Improves Personalization of Dialytic Prescription and Patient's Independence. <i>Blood Purification.</i> 2018;46(2):111-7.                                                                                                                                                                                                              | No control group                                                   |
| Milan Manani S, Rosner MH, Virzi GM, Giuliani A, Berti S, Crepaldi C, et al. Longitudinal Experience with Remote Monitoring for Automated Peritoneal Dialysis Patients. <i>Nephron.</i> 2019;142(1):1-9.                                                                                                                                                                                                                                                                  | No control group                                                   |
| Musso CG, Plazzotta F, Otero C, Aguilera J, Campos F, Diez GR, et al. Informatic nephrology: 17 years of one-center experience. <i>International Urology and Nephrology.</i> 2015;47(9):1587-8.                                                                                                                                                                                                                                                                           | Letter (not empirical study)                                       |
| Nayak KS, Ronco C, Karopadi AN, Rosner MH. Telemedicine and Remote Monitoring: Supporting the Patient on Peritoneal Dialysis. <i>Perit Dial Int.</i> 2016;36(4):362-6.                                                                                                                                                                                                                                                                                                    | No control group: summary from three different studies             |
| Patterson P. Telehealth for Home Dialysis Therapies. <i>Nephrol Nurs J.</i> 2017;44(6):545-8.                                                                                                                                                                                                                                                                                                                                                                             | An interview with a doctor                                         |
| Polanco E, Aquey M, Collado J, Campos E, Guzman J, Cuevas-Budhart MA, et al. A COVID-19 pandemic-specific, structured care process for Peritoneal Dialysis patients facilitated by Telemedicine: therapy continuity, prevention and complications management. <i>Therapeutic apheresis and dialysis : official peer-reviewed journal of the International Society for Apheresis, the Japanese Society for Apheresis, the Japanese Society for Dialysis Therapy.</i> 2021. | No control group                                                   |
| Ronco C, Manani SM, Giuliani A, Tantillo I, Reis T, Brown EA. Remote patient management of peritoneal dialysis during COVID-19 pandemic. <i>Perit Dial Int.</i> 2020;40(4):363-7.                                                                                                                                                                                                                                                                                         | Review                                                             |
| Scarpioni R, Manini A, Chiappini P. Remote patient monitoring in peritoneal dialysis helps reduce risk of hospitalization during Covid-19 pandemic. <i>J Nephrol.</i> 2020;33(6):1123-4.                                                                                                                                                                                                                                                                                  | There are patients with RPM and without, but they are not compared |
| Tangaro S, Fanizzi A, Amoroso N, Corciulo R, Garuccio E, Gesualdo L, et al. Computer aided detection system for prediction of the malaise during hemodialysis. <i>Computational and Mathematical Methods in Medicine.</i> 2016;2016 (no pagination).                                                                                                                                                                                                                      | No control group without TM                                        |
| Viglino G, Neri L, Barbieri S, Tortone C. Videodialysis: a pilot experience of telecare for assisted peritoneal dialysis. <i>J Nephrol.</i> 2020;33(1):177-82.                                                                                                                                                                                                                                                                                                            | No relevant outcomes                                               |
| Wood E, McCarthy K, Roper M. Remote monitoring of peritoneal dialysis: evaluating the impact of the Claria Sharesource system. <i>Journal of Kidney Care.</i> 2019;4(1):16-24.                                                                                                                                                                                                                                                                                            | No control group                                                   |

|                                                                                                                                                                                                       |                                |
|-------------------------------------------------------------------------------------------------------------------------------------------------------------------------------------------------------|--------------------------------|
| Yeter HH, Karacalik C, Eraslan E, Akcay OF, Derici U, Ronco C. Effect of remote patient management in peritoneal dialysis on haemodynamic and volume control. <i>Nephrology</i> . 2020;25(11):856-64. | No pre-intervention assessment |
|-------------------------------------------------------------------------------------------------------------------------------------------------------------------------------------------------------|--------------------------------|
