# Supplementary material for: Effect of remote patient monitoring for patients with chronic kidney disease who perform dialysis at home: a systematic review
Source: PubMed Central journal article supplement — BMJ Open. 2022 Dec 7;12(12):e061772. doi: 10.1136/bmjopen-2022-061772 (PMC9730362; doi:10.1136/bmjopen-2022-061772), 2022-12-07
Supplement: bmjopen-2022-061772supp003.pdf [file bmjopen-2022-061772supp003.pdf]

### Supplemental Appendix 3: Description of the studies' risk of bias, variables adjusted for in the analyses and sources of funding

#### Risk of bias for the RCTs

|           | Random sequence generation (selection bias) | Allocation concealment (selection bias) | Blinding of participants and personnel (performance bias) | Blinding of outcome assessment (detection bias) | Incomplete outcome data (attrition bias) | Selective reporting (reporting bias) | Other bias |
|-----------|---------------------------------------------|-----------------------------------------|-----------------------------------------------------------|-------------------------------------------------|------------------------------------------|--------------------------------------|------------|
| Cao 2018  | +                                           | ?                                       | ?                                                         | ?                                               | +                                        | ?                                    | +          |
| Jung 2021 | +                                           | ?                                       | -                                                         | -                                               | +                                        | +                                    | +          |

#### Risk of bias for the retrospective cohort studies

| Study                 | Selection |     |     |    | Comparability | Outcome |     |     | Stars:<br>Quality |
|-----------------------|-----------|-----|-----|----|---------------|---------|-----|-----|-------------------|
|                       | 1         | 2   | 3   | 4  |               | 1       | 2   | 3   |                   |
| <b>Chaudhuri 2020</b> | 1b*       | 2a* | 3a* | 4b | 1ab**         | 1b*     | 2a* | 3d  | 7: Good           |
| <b>Corzo 2020</b>     | 1b*       | 2a* | 3a* | 4b | 1ab**         | 1b*     | 2a* | 3b* | 9: Good           |
| <b>Milan 2020</b>     | 1c        | 2a* | 3a* | 4b | 1-            | 1b*     | 2a* | 3b* | 6: Fair           |
| <b>Sanabrina 2019</b> | 1b*       | 2a* | 3a* | 4b | 1ab           | 1b*     | 2a* | 3b* | 9: Good           |
| <b>Weinhandl 2018</b> | 1b*       | 2a* | 3a* | 4b | 1ab**         | 1b*     | 2a* | 3d  | 7: Good           |

**Variables adjusted for in the analyses**

|                       | <b>Hospitalisations</b>                                                                                                                                                  | <b>Technical failure</b>                                                                                             | <b>QoL</b>                                  |
|-----------------------|--------------------------------------------------------------------------------------------------------------------------------------------------------------------------|----------------------------------------------------------------------------------------------------------------------|---------------------------------------------|
| <b>Chaudhuri 2020</b> | User group, Age, Gender, Race/ethnicity, Comorbidity, Laboratory measures, Education, Alcohol dependency, Urbanicity                                                     | User group, Age, Gender, Race/ethnicity, Comorbidity, Laboratory measures, Education, Alcohol dependency, Urbanicity |                                             |
| <b>Corzo 2020</b>     |                                                                                                                                                                          | Death, Kidney transplant                                                                                             |                                             |
| <b>Jung 2021</b>      |                                                                                                                                                                          |                                                                                                                      | Age, Diabetes, Serum albumin concentrations |
| <b>Sanabria 2019</b>  | Age, Gender, Education, CKD cause, Comorbidity index, Hemoglobin, Albumin, Phosphorus, Diuresis, Peritoneal equilibration test %, City, Follow-up time, Cause of censure |                                                                                                                      |                                             |
| <b>Weinhandl 2018</b> |                                                                                                                                                                          | Age, Sex, Race, Vascular access modality                                                                             |                                             |

**Sources of funding**

**Cao 2018:** “This project is supported by the 2014 Appropriate Technology Promotion Funding Plan for primary organizations and cities by the Fujian Provincial Health and Family Planning Commission and key Clinical Specialty Discipline Construction Program of Fujian, P.R.C.”

**Jung 2021:** “This research was supported by a grant from the Korea Health Technology R&D Project through the Korea Health Industry Development Institute, funded by the Ministry of Health & Welfare, Republic of Korea (HC15C1129). The sponsor of this study had no role in the study design collection, data management, data analysis, interpretation of data, writing of the report, and the decision to submit the report for publication”

**Chaudhuri 2020:** “Analysis was supported by Fresenius Medical Care“

**Corzo 2020:** “This work was funded by Renal Therapy Services, Colombia”

**Milan 2020:** “The authors did not use funding sources”

**Sanabria 2019:** “The study was supported by Baxter Renal Care Services Colombia, an independent entity owned by Baxter International, Inc. Funding to support the preparation of this manuscript was provided by Baxter Healthcare Corporation, Deerfield, Illinois. Baxter Healthcare Corporation participated in reviewing the manuscript for scientific accuracy”

**Weinhandl 2018:** *“Conflict of Interest: Dr Weinhandl and Dr Collins are both employees of NxStage Medical. Disclosure of grants or other funding: The authors are solely responsible for the design of the study and the content of the manuscript. The content of the manuscript was reviewed by other NxStage Medical employees only for the verification of compliance with product labeling.”*
